# Supplementary material for: Is adequate pain relief and time to analgesia associated with emergency department length of stay? A retrospective study
Source: PubMed Central journal article supplement — BMJ Open. 2014 Mar 25;4(3):e004288. doi: 10.1136/bmjopen-2013-004288 (PMC3975786; doi:10.1136/bmjopen-2013-004288), 2014-03-25
Supplement: bmjopen-2013-004288.draft_revisions.pdf [file bmjopen-2013-004288.draft_revisions.pdf]

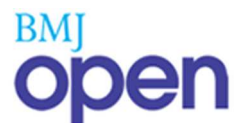

**Rapid analgesia administration rather than adequate pain relief reduces emergency department length of stay.**

|                                 |                                                                                                                                                                                                                                                          |
|---------------------------------|----------------------------------------------------------------------------------------------------------------------------------------------------------------------------------------------------------------------------------------------------------|
| Journal:                        | <i>BMJ Open</i>                                                                                                                                                                                                                                          |
| Manuscript ID:                  | bmjopen-2013-004288                                                                                                                                                                                                                                      |
| Article Type:                   | Research                                                                                                                                                                                                                                                 |
| Date Submitted by the Author:   | 23-Oct-2013                                                                                                                                                                                                                                              |
| Complete List of Authors:       | Sokoloff, Catalina; Hôpital Sacré-Coeur de Montréal, Emergency<br>Paquet, Jean; Hôpital Sacré-Coeur de Montréal, Emergency<br>Chauny, Jean-Marc; Hôpital Sacré-Coeur de Montréal, Emergency<br>Daoust, Raoul; Hôpital Sacré-Coeur de Montréal, Emergency |
| <b>Primary Subject Heading</b>: | Emergency medicine                                                                                                                                                                                                                                       |
| Secondary Subject Heading:      | Emergency medicine, Health services research                                                                                                                                                                                                             |
| Keywords:                       | Pain management < ANAESTHETICS, ACCIDENT & EMERGENCY MEDICINE,<br>Organisation of health services < HEALTH SERVICES ADMINISTRATION &<br>MANAGEMENT                                                                                                       |
|                                 |                                                                                                                                                                                                                                                          |

SCHOLARONE™  
Manuscripts

1  
2  
3 **Rapid analgesia administration rather than adequate pain relief reduces emergency**  
4 **department length of stay.**  
5  
6  
7

8  
9 **Corresponding author:** Raoul Daoust  
10 5400 boul. Gouin Ouest,  
11 Montréal, Québec, Canada,  
12 H4J 1C5.  
13 T: 514-338-2222#3318  
14 Fax : 514-338-3513  
15 [raoul.daoust@videotron.ca](mailto:raoul.daoust@videotron.ca)  
16  
17  
18  
19  
20

21 Catalina Sokoloff, MD,<sup>a,b</sup>, Jean Paquet, PhD<sup>a,c</sup>, Jean-Marc Chauny, MD, MSc<sup>a,b</sup>, Raoul  
22 Daoust, MD, MSc<sup>a,b</sup>,  
23  
24  
25  
26

27 <sup>a</sup>Department of Emergency Medicine, Research Centre, Hôpital du Sacré-Cœur de  
28 Montréal, Montréal, Québec, Canada  
29

30 <sup>b</sup>Faculty of Medicine, Université de Montréal, Montréal, Québec, Canada  
31

32 <sup>c</sup>Centre for Advanced Research in Sleep Medicine and Department of Surgery, Hôpital du  
33 Sacré-Coeur de Montréal, Montreal, Quebec, Canada  
34  
35  
36  
37

38 **Keywords :** Analgesia, Length of Stay, Emergency department, Pain relief  
39  
40  
41  
42  
43

44 **Word count (excluding abstract):** 2 129  
45  
46  
47  
48  
49  
50  
51  
52  
53  
54  
55  
56  
57  
58  
59  
60

## ABSTRACT

**Objectives:** Evaluate the influence of adequate analgesia and time to analgesic treatment on emergency department (ED) length of stay (LOS).

**Setting and Design:** Post-hoc analysis of real time archived data.

**Participants:** We included all consecutive ED patients  $\geq 18$  years with pain intensity  $>6$  (verbal numerical scale from 0 to 10), assigned to an ED bed, and whose pain was re-evaluated less than 1 hour after receiving analgesic treatment.

**Outcome measures:** The main outcome was ED-LOS in patients who had adequate pain relief (AR =  $\downarrow 50\%$  pain intensity) compared to those who did not have such relief (NR).

**Results:** A total of 2,033 patients (mean age 49.5 years; 51% men) met our inclusion criteria; 58.3% were discharged, and 41.7% were admitted. Among patients discharged or admitted, there was no significant difference in ED-LOS between those with AR (median=9.6 hours, interquartile range: (IQR) 8.5, and 18.2 hours, IQR: 14.1, respectively) and NR (median=9.6 hours, IQR: 9.4, and 17.4 hours, IQR: 15.4, respectively). After controlling for confounding factors, only rapid time to analgesia (and not adequate pain relief) was associated with shorter ED-LOS of both discharged and admitted patients ( $p < 0.001$  and  $p < 0.05$  respectively). When adjusting for confounding variables, ED-LOS is shortened by 1.2 hour when delay to receive analgesic is  $<90$  min compared to  $>90$  min for discharged and by 1.1 hour for admitted patients.

**Conclusions:** In our study, adequate pain relief was not linked with short ED-LOS. Only rapid administration of analgesia was coupled with short ED-LOS.

## ARTICLE SUMMARY

### Strengths and limitations of this study

-This is a rare study that examines the relationship between pain relief and length of stay controlling for multiple confounding variables in a large cohort of emergency department patients.

-The main limitation of our study is its post hoc design and pre-formed database from a single-centre study in an academic hospital.

## INTRODUCTION

Emergency department (ED) overcrowding has been a concern for many years, and Canada is no exception, with nearly 60% of EDs reporting that problem in 2007.<sup>1</sup> The phenomenon of “boarding” is one of the principal factors identified as its cause.<sup>2,3</sup> “Boarding” (or “access block”) refers to situations where bedridden emergency patients wait for the allocation of a bed on the ward for an unreasonably long time period (prolong ED length of stay) with consequent patient overflow in EDs. However, a recent retrospective study revealed that among patients waiting more than 6 hours in the ED, 50% were finally admitted while the other 50% were discharged,<sup>4</sup> indicating that non-boarding patients length of stay (LOS) also contribute to overcrowding. It has been shown to be a strong predictor of low satisfaction among patients<sup>5</sup> and healthcare workers.<sup>1</sup> It is also associated with long hospital LOS,<sup>6,7</sup> and high short- and medium-term mortality rates.<sup>8-10</sup> Furthermore, overcrowding is linked with reduced timeliness and quality of interventions and treatments,<sup>11-13</sup> including delayed analgesic administration,<sup>14,15</sup> particularly when pain is severe,<sup>16</sup> all of which contribute to the snowball effect of cumulating waits.

1  
2  
3 Pain represents more than 40% of consultations in EDs.<sup>17</sup> In large studies of  
4  
5 patients with moderate to severe pain, only 21 to 68%<sup>18-27</sup> received analgesics, and 50 to  
6  
7 74% still had moderate to severe pain at discharge.<sup>17</sup> Severe, persistent pain may also  
8  
9 lead to unwanted physiological responses, namely, increased adrenergic tone, augmented  
10  
11 oxygen consumption, predisposition to hypercoagulability, decreased immune function,  
12  
13 and heightened risk of delirium.<sup>28,29</sup> Moreover, adequate and timely treatment of acute  
14  
15 pain could reduce the risk of chronic pain.<sup>17</sup> The relationship between pain management  
16  
17 and LOS has not been studied as a primary outcome. However, a study of intermittent  
18  
19 injection vs patient-controlled analgesia (PCA) for sickle cell crisis pain in the ED,  
20  
21 established that PCA was associated with a significant reduction in length of ED stay,  
22  
23 although there was no difference in initial or final pain intensity score<sup>30</sup>.  
24  
25  
26  
27  
28

29  
30 Recent studies have attempted to identify the factors contributing to prolonged  
31  
32 ED-LOS. Many of them have already been recognized, namely, number of laboratory  
33  
34 examinations required, having to undergo X-ray or scan, the need for more than 3  
35  
36 medications, and number of consultants.<sup>10,31</sup> To the best of our knowledge, the adequacy  
37  
38 and effectiveness of pain management have never been investigated in this regard. We  
39  
40 sought to evaluate which component of initial pain management was associated with ED-  
41  
42 LOS reduction. We hypothesized that ED-LOS would be lessened in patients with  
43  
44 significant pain relief.  
45  
46  
47  
48  
49  
50

## 51 MATERIALS AND METHODS

### 52 53 Study design

1  
2  
3 We conducted *post hoc* analysis of real time archived data on all consecutive  
4 patients presenting with severe pain at our ED between March 2008 and February 2011.  
5  
6 The aim of our study was to assess if pain relief was associated with ED-LOS reduction.  
7  
8 As a secondary objective, we evaluated if time to receiving analgesic treatment was  
9  
10 linked with lessened ED-LOS.  
11  
12  
13  
14  
15  
16  
17

### 18 **Setting**

19  
20 Hôpital du Sacré-Cœur de Montreal is an urban, adult, level I trauma centre with  
21  
22 540 inpatient beds and 60,000 ED visits per year. It sustains 22,000 hospitalizations  
23  
24 annually, of which 51% are admitted through the ED. The study was approved by the  
25  
26 institutional review board.  
27  
28  
29  
30  
31

### 32 **Selection of participants**

33  
34 Patients 18 years or older were included if they were assigned to an ED treatment  
35  
36 bed, had severe pain at triage (defined as  $>6$  on an 11-point verbal numerical scale from 0  
37  
38 to 10),<sup>32-34</sup> received an analgesic, and had their pain intensity re-evaluated in less than 1  
39  
40 hour after such medication.  
41  
42

43  
44 Patients were excluded if they died during their ED stay, were pregnant or had  
45  
46 been transferred from another hospital. We also excluded patients with altered mental  
47  
48 status, intoxicated subjects, and anyone with chest pain necessitating emergent PCI,  
49  
50 because their LOS could be determined by treatments other than pain management.  
51  
52  
53  
54

### 55 **Data collection**

1  
2  
3 Data were extracted from computerized information and nursing records in our  
4 ED (MedUrge™, MediaMed Technologies, Mont-Saint-Hilaire, Québec, Canada). This  
5 system is an integrated and mandatory working tool for all physicians, nursing staff, and  
6 any employee involved in the ED healthcare process. It contains all demographic data,  
7 triage information (including vital signs, purpose of consultation, and pain level when  
8 relevant) as well as any pertinent data collected in real time by nurses during their re-  
9 evaluation rounds, including medication administration, and pain intensity.  
10  
11  
12  
13  
14  
15  
16  
17  
18  
19  
20  
21

## 22 **Data processing**

23  
24 The cut-off of >6 on 10 was chosen because it was felt that lower pain intensity is  
25 less likely to warrant observation in itself. ED-LOS was measured in hours from the time  
26 of arrival at the ED to discharge or admission to a ward. We defined adequate pain relief  
27 (AR) as reduction of 50% or more of the initial pain level scored on the numerical scale  
28 within 1 hour after receiving the first analgesic. The 50% reduction and the 1-hour  
29 threshold are based on previous literature suggesting that they represent a meaningful  
30 decline<sup>35,36</sup> and acceptable delay in managing severe pain.<sup>34,37,38</sup> Initial pain was the one  
31 reported on the triage form. Time between arrival and analgesic administration was  
32 dichotomized into ≤90 minutes versus >90 minutes. We selected a 90-minute threshold  
33 because it is the median time to analgesia reported in many EDs with a pain scale  
34 integrated in their triage assessment.<sup>19,39,40</sup>  
35  
36  
37  
38  
39  
40  
41  
42  
43  
44  
45  
46  
47  
48  
49

50 Our primary outcome was ED-LOS of patients with and without adequate pain  
51 relief. Our secondary outcome was ED-LOS of patients who received their medication in  
52 ≤90 minutes compared to those who received it after a longer time period.  
53  
54  
55  
56  
57  
58  
59  
60

## Data analysis

Median LOS between groups of patients was compared by the Mann-Whitney U test and relationship among LOS and continuous predictors by Spearman rank-order correlations. To examine the relative influence of adequate pain relief and time to analgesia on LOS, multiple linear regression was undertaken for patients discharged from the ED and those admitted to a ward, controlling for age, gender, route of administration (IV vs other), type of arrival at ED (ambulance or alone), triage priority (high vs low), crowding defined as number of patients in ED beds at the time of arrival, time between arrival and physician's first assessment, number of examinations, number of specialty consultations, trauma versus non-trauma, abdominal pain versus other, need for oxygen and for isolation. The Canadian healthcare system being public and free, the presence or absence of insurance was not analyzed. For multivariate analysis, LOS was log-transformed to normalize distribution. Alpha level was set at 0.05 for all statistical tests. All data were analyzed with SPSS version 20 (IBM, Somers, NY).

## RESULTS

A total of 2,033 patients met our inclusion and exclusion criteria. Of these patients, about 50% were male, 2/3 arrived on foot, 1,186 (58.3%) were finally discharged, and 847 were admitted (Table 1).

Among patients who were discharged from the ED, 45.7% had AR compared to 40.3% of admitted patients. There was no significant difference in ED-LOS between patients with AR compared to those without adequate relief (NR) ( $p=0.41$  for discharged patients and  $p=0.87$  for admitted patients) (Figure 1).



Table 1. Patient characteristics of the whole sample

| Characteristics                                                          | Total (N=2,033) |
|--------------------------------------------------------------------------|-----------------|
| Mean age ( $\pm$ SD)                                                     | 49.5 (17.0)     |
| % male                                                                   | 51.0            |
| % Triage priority                                                        |                 |
| -high (1-2)                                                              | 45.3            |
| -low (3-4-5)                                                             | 54.7            |
| % Arrival                                                                |                 |
| -ambulance                                                               | 29.2            |
| -standing                                                                | 70.8            |
| % -admitted                                                              | 41.7            |
| -returning home                                                          | 58.3            |
| % -treated with opiates only                                             | 66.7            |
| -treated with non-opiates only                                           | 11.1            |
| -treated with combination                                                | 22.2            |
| % Route of administration                                                |                 |
| -IV                                                                      | 62.0            |
| -other                                                                   | 38.0            |
| Mean ( $\pm$ SD) baseline pain intensity score                           | 8.8 (1.1)       |
| Mean ( $\pm$ SD) final pain intensity score                              | 5.1 (3.0)       |
| Median LOS in hours (IQR)                                                | 12.3 (12.6)     |
| Median time between arrival at ED and analgesic treatment in hours (IQR) | 1.8 (2.1)       |
| Median time to patient care by physician in hours (IQR)                  | 0.72 (0.98)     |

LOS: length of stay; IQR: interquartile range

Among patients who were discharged from the ED, 533 (45%) received analgesia  $\leq$ 90 minutes, with ED-LOS reduction of 2.3 hours ( $p < 0.001$ ) compared to those with  $>$ 90 minutes. The same analysis was applied to patients being admitted: only 265 (31%)

1  
2  
3 received their medication in that interval, and their median ED-LOS reduction was 3.9  
4  
5 hours ( $p < 0.001$ ) (Figure 2).  
6  
7

8 Table 2 and 3 show the bivariate relations between LOS and all confounding  
9  
10 variables for discharged and admitted patients respectively. For discharged patients, only  
11  
12 type of arrival and crowding were not related to LOS while type of arrival, gender and  
13  
14 triage priority were not associated with LOS for admitted patients.  
15  
16

17  
18 Multivariate analysis showed that when controlling for confounding variables, a  
19  
20 brief time period ( $\leq 90$  minutes) before analgesic administration (and not adequate pain  
21  
22 relief) is associated with shortened ED-LOS for both discharged and admitted patients  
23  
24 ( $\beta = 0.07$ ; 95% confidence interval (95% CI): 0.04-0.10;  $p < 0.001$  and  $\beta = 0.04$ ; 95% CI:  
25  
26 0.006-0.08;  $p < 0.05$ , respectively). When adjusting for confounding variables, ED-LOS is  
27  
28 shortened by 1.2 hour when delay to receive analgesic is  $< 90$  min compared to  $> 90$  min  
29  
30 for discharged and by 1.1 hour for admitted patients.  
31  
32  
33  
34  
35

### 36 **LIMITATIONS**

37  
38 The main limitation of our study is its post hoc design and pre-formed database.  
39  
40 Potential confounding variables, such as ethnicity and linguistic barrier, which are not  
41  
42 recorded in demographic charts of our computerized system, could not be taken into  
43  
44 consideration. Time from pain onset, component of chronic pain and pharmacological or  
45  
46 non-pharmacological analgesia prior to arrival at the ED were also unknown. Case  
47  
48 complexity assessment was difficult, although we controlled for number of examinations,  
49  
50 number of consultants, need for oxygen and for isolation, which are markers of  
51  
52 complexity. Likewise, we do not know if some patients did not receive an analgesic nor  
53  
54  
55  
56  
57  
58  
59  
60

Table 2. Relationship between length of stay and all confounding variables for discharged patients.

| Confounding variables              | Length of stay in hour (N=1186) | P level             |
|------------------------------------|---------------------------------|---------------------|
| <b>Categorical confounders:</b>    |                                 |                     |
|                                    | Median (IQR)                    | Mann-Whitney U test |
| Gender: -male                      | 9.0 (7.8)                       | <0.001              |
| -female                            | 10.6 (10.2)                     |                     |
| Triage priority: -high (1-2)       | 9.5 (8.5)                       | <0.05               |
| -low (3-4-5)                       | 9.8 (9.2)                       |                     |
| Arrival: -ambulance                | 9.7 (10.1)                      | 0.55                |
| -standing                          | 9.6 (8.4)                       |                     |
| Route of administration: -IV       | 10.2 (8.6)                      | <0.001              |
| -other                             | 8.8 (8.3)                       |                     |
| Trauma injury: -Yes                | 6.8 (8.5)                       | <0.001              |
| -No                                | 9.8 (8.9)                       |                     |
| Abdominal pain: -Yes               | 11.2 (9.9)                      | <0.001              |
| -No                                | 9.1 (7.9)                       |                     |
| Blood test: -Yes                   | 17.5 (12.9)                     | <0.001              |
| -No                                | 9.5 (8.7)                       |                     |
| Heart-rate monitoring: -Yes        | 13.9 (16.6)                     | <0.001              |
| -No                                | 9.3 (8.5)                       |                     |
| Oxygen support: -Yes               | 13.0 (13.4)                     | <0.001              |
| -No                                | 9.5 (8.7)                       |                     |
| Isolation: -Yes                    | 22.7 (29.7)                     | <0.001              |
| -No                                | 9.5 (8.6)                       |                     |
| <b>Continuous confounders:</b>     |                                 |                     |
|                                    | Spearman rank-order correlation | P level             |
| Age:                               | 0.14                            | <0.001              |
| Crowding:                          | 0.004                           | 0.89                |
| Physician taking charge delay:     | 0.17                            | <0.001              |
| Number of exams:                   | 0.31                            | <0.001              |
| Number of specialist consultation: | 0.43                            | <0.001              |

IQR: interquartile range; IV: intravenous

Table 3. Relationship between length of stay and all confounding variables for **admitted** patients.

| Confounding variables              | Length of stay in hour (N=847)  | P level             |
|------------------------------------|---------------------------------|---------------------|
| <b>Categorical confounders:</b>    |                                 |                     |
|                                    | Median (IQR)                    | Mann-Whitney U test |
| Gender: -male                      | 17.0 (14.3)                     | 0.13                |
| -female                            | 18.6 (15.3)                     |                     |
| Triage priority: -high (1-2)       | 17.1 (15.1)                     | 0.07                |
| -low (3-4-5)                       | 18.2 (14.7)                     |                     |
| Arrival: -ambulance                | 18.5 (16.1)                     | 0.47                |
| -standing                          | 17.3 (14.2)                     |                     |
| Route of administration: -IV       | 16.7 (13.6)                     | <0.01               |
| -other                             | 19.4 (15.4)                     |                     |
| Trauma injury: -Yes                | 13.7 (15.8)                     | <0.05               |
| -No                                | 17.9 (14.6)                     |                     |
| Abdominal pain: -Yes               | 17.1 (12.8)                     | <0.05               |
| -No                                | 18.7 (16.3)                     |                     |
| Blood test: -Yes                   | 21.1 (17.6)                     | <0.01               |
| -No                                | 17.2 (14.2)                     |                     |
| Heart-rate monitoring: -Yes        | 27.1 (26.6)                     | <0.001              |
| -No                                | 16.5 (13.2)                     |                     |
| Oxygen support: -Yes               | 21.9 (21.8)                     | <0.001              |
| -No                                | 17.1 (13.9)                     |                     |
| Isolation: -Yes                    | 30.5 (34.8)                     | <0.001              |
| -No                                | 17.0 (13.6)                     |                     |
| <b>Continuous confounders:</b>     |                                 |                     |
|                                    | Spearman rank-order correlation | P level             |
| Age:                               | 0.18                            | <0.001              |
| Crowding:                          | 0.08                            | <0.05               |
| Physician taking charge delay:     | 0.14                            | <0.001              |
| Number of exams:                   | 0.33                            | <0.001              |
| Number of specialist consultation: | 0.33                            | <0.001              |

IQR: interquartile range; IV: intravenous

1  
2  
3 had suboptimal pain management because of refusal. However, it is doubtful that any of  
4  
5 these confounding variables would cause significant differential bias.  
6  
7

8 Although we controlled for crowding at the time of visit, we could not track how  
9  
10 many nurses were on duty during patient stay. Short-staffing could have been a factor in  
11  
12 the prolonged LOS and rate of re-assessment of some patients. However, our rate of pain  
13  
14 intensity re-assessment was similar to previously-reported performances (data not  
15  
16 shown).<sup>19</sup> Finally, our single-center study in an academic hospital might limit the  
17  
18 generalization of our results.  
19  
20  
21

## 22 23 24 25 **DISCUSSION**

26  
27 As far as we know, this is the first investigation to evaluate the impact of pain  
28  
29 relief on ED-LOS, and our results demonstrated that rapid administration of analgesia,  
30  
31 and not adequate pain relief, is associated with shorter ED-LOS. It has been reported that  
32  
33 patients expect to receive pain medication 25 to 30 minutes after their arrival,<sup>41</sup> which  
34  
35 coincides with the guidelines of our triage system (Canadian Emergency Department  
36  
37 Triage and Acuity Scale).<sup>42</sup> Unfortunately, this goal is far from being achieved in many  
38  
39 EDs, not only in Canada, but also around the world.<sup>19,27,41</sup> This is a persistent problem  
40  
41 that dates back to the late 1980s when Wilson and Pendleton first defined the term  
42  
43 “oligoanalgesia”.<sup>43</sup>  
44  
45  
46  
47

48 More recently, the Pain and Emergency Medicine Initiative study demonstrated that  
49  
50 patient satisfaction was associated more with the way ED physicians responded to their  
51  
52 complaints of pain than to the actual result of pain treatment.<sup>19</sup> Which components of this  
53  
54 response to pain were significant was not specified, but a possible part of it was the  
55  
56  
57  
58  
59  
60

1  
2  
3 promptness with which pain was addressed. Patients with severe pain probably associate  
4 receiving pain medication quickly with quality of care and are more inclined to accept a  
5 medical treatment plan, even if they do not get relief. This might explain why we  
6 observed improved ED-LOS with prompt analgesic administration in patients being  
7 discharged or admitted.  
8  
9

10  
11  
12  
13  
14  
15 In our study, the adjusted ED-LOS was 1.2 hours shorter in discharged patients  
16 who received their medication in  $\leq 90$  minutes than in those treated in  $> 90$  minutes. The  
17 rapid administration of analgesia, associated with shorter ED-LOS, could have a  
18 significant impact on ED overcrowding. For example, our center received an average of  
19 5,000 patients per year with severe pain on an ED bed. If we extrapolate the proportion of  
20 patient who received analgesia  $>90$  minutes after arrival and the time saved if received in  
21 less than 90 minutes from our study to this population, a bed could be available during  
22 9.4 hours every day. Such economy of beds would contribute to better throughput of  
23 patients and render our EDs more efficient, as espoused by Asplin et al. with their  
24 conceptual model of overcrowding in 2003.<sup>2</sup>  
25  
26  
27  
28  
29  
30  
31  
32  
33  
34  
35  
36  
37

38  
39 A recent consensus of the Canadian Association of Emergency Physicians has  
40 ranked “ED-LOS” and “Time to first dose of analgesic” in the top 12 priority indicators  
41 of quality care.<sup>44</sup> In the USA, the Joint Commission on Accreditation of Healthcare  
42 Organizations mentions “early intervention” as the first goal in the treatment of acute  
43 pain.<sup>37</sup> Similarly, the Australian National Institute of Clinical Studies ranked “reduced  
44 time to analgesia” as the top priority and is currently working on improving their  
45 numbers.<sup>41</sup>  
46  
47  
48  
49  
50  
51  
52  
53  
54  
55  
56  
57  
58  
59  
60

1  
2  
3  
4  
5  
6  
7  
8  
9  
10  
11  
12  
13  
14  
15  
16  
17  
18  
19  
20  
21  
22  
23  
24  
25  
26  
27  
28  
29  
30  
31  
32  
33  
34  
35  
36  
37  
38  
39  
40  
41  
42  
43  
44  
45  
46  
47  
48  
49  
50  
51  
52  
53  
54  
55  
56  
57  
58  
59  
60

New solutions are being proposed to improve the initial approach to pain management. For example, the simple act of making pain scoring mandatory at triage has been shown to reduce time to analgesia by 45 minutes.<sup>40</sup> Extension of this practice could also integrate pain treatment as early as triage to limit further delays. Such measures have been introduced in Australia where nurse-initiated pain protocols are currently being evaluated. A pediatric ED study has shown 50% reduction of time to analgesia with such a protocol.<sup>39</sup> Early administration of analgesics has been investigated in pre-hospital settings, and appears to be safe and effective, particularly with the use of intranasal Fentanyl.<sup>45,46</sup> Even if no study has yet shown a benefit of this practice in LOS, it certainly has promising advantages, and further investigations should be considered.

In summary, we found that shorter time to analgesia administration is associated with ED-LOS reduction. This observation supports recent interest in analgesia implementation as early as triage or in pre-hospital settings to improve the throughput component of the overcrowding phenomenon seen in EDs around the world.

**Contributors** CS, RD and JMC conceived the study and obtained research funding. JP mined and analyzed the data. CS drafted the manuscript, and all authors contributed substantially to its revision. CS takes responsibility for the paper as a whole. All co-authors have had the opportunity to review the final manuscript and have provided their permission to publish the manuscript.

**Funding** This study was supported by the Emergency Department Research Fund of Hôpital du Sacré-Coeur de Montréal.

**Competing interests** None.

1  
2  
3 **Ethics approval** The study was approved by the institutional review board.  
4  
5

6 **Provenance and peer review** Not commissioned; externally peer reviewed.  
7  
8  
9

## 10 **BIBLIOGRAPHY**

- 11 1. Bond K, Ospina MB, Blitz S, et al. Frequency, determinants and impact of  
12 overcrowding in emergency departments in Canada: a national survey. *Healthc Q*  
13 2007;10:32-40.  
14
- 15 2. Asplin BR, Magid DJ, Rhodes KV, et al. A conceptual model of emergency  
16 department crowding. *Ann Emerg Med* 2003;42:173-80.  
17
- 18 3. Health Technology Assessment – Strategies to reduce emergency department  
19 overcrowding, Alberta Heritage Foundation for Medical Research, 2006.  
20
- 21 4. Henneman PL, Nathanson BH, Li H, et al. Emergency department patients who  
22 stay more than 6 hours contribute to crowding. *J Emerg Med* 2010;39:105-12.  
23
- 24 5. Taylor C. Patient satisfaction in emergency medicine. *Emerg Med J* 2004;21:528-  
25 32.  
26
- 27 6. Bernstein SL, Aronsky D, Duseja R, et al. The effect of emergency department  
28 crowding on clinically oriented outcomes. *Acad Emerg Med* 2009;16:1-10.  
29
- 30 7. Richardson DB. The access-block effect: relationship between delay to reaching  
31 an inpatient bed and inpatient length of stay. *Med J Aust* 2002;177:492-5.  
32
- 33 8. Richardson DB. Increase in patient mortality at 10 days associated with  
34 emergency department overcrowding. *Med J Aust* 2006;184:213-6.  
35  
36  
37  
38  
39  
40  
41  
42  
43  
44  
45  
46  
47  
48  
49  
50  
51  
52  
53  
54  
55  
56  
57  
58  
59  
60



- 1  
2  
3 9. Sprivulis PC, Da Silva JA, Jacobs IG, et al. The association between hospital  
4 overcrowding and mortality among patients admitted via Western Australian  
5 emergency departments. *Med J Aust* 2006;184:208-12.  
6  
7
- 8  
9  
10 10. Mowery NT, Dougherty SD, Hildreth AN, et al. Emergency department length of  
11 stay is an independent predictor of hospital mortality in trauma activation patients.  
12 *J Trauma* 2011;70:1317-25.  
13  
14
- 15 11. Miró O, Antonio MT, Jiménez S, et al. Decreased health care quality associated  
16 with emergency department overcrowding. *Eur J Emerg Med* 1999;6:105-7.  
17  
18
- 19 12. Trzeciak S, Rivers EP. Emergency department overcrowding in the United  
20 States: an emerging threat to patient safety and public health. *Emerg Med J*  
21 2003;20:402-5.  
22  
23
- 24 13. Joint Commission on Accreditation Healthcare Organizations, Sentinel Event  
25 Alert - Delays in treatment. Issue 26, June 2002  
26  
27
- 28 14. Hwang U, Morrison R, Harris B, et al. The association of ED crowding factors  
29 with quality of pain management. *Acad Emerg Med* 2007;14:S54.  
30  
31
- 32 15. Hwang U, Richardson LD, Sonuyi TO, et al. The effect of emergency department  
33 crowding on the management of pain in older adults with hip fracture. *J Am*  
34 *Geriat Soc* 2006;54:270-5.  
35  
36
- 37 16. Pines JM, Hollander JE. Emergency department crowding is associated with poor  
38 care for patients with severe pain. *An Emerg Med* 2008;51:1-5.  
39  
40
- 41 17. Sinatra R. Causes and consequences of inadequate management of acute pain.  
42 *Pain Med* 2010;11:1859-71.  
43  
44  
45  
46  
47  
48  
49  
50  
51  
52  
53  
54  
55  
56  
57  
58  
59  
60

- 1  
2  
3 18. Selbst SM. Analgesic use in the emergency department. *Ann Emerg Med*  
4 1990;19:1010-13.  
5  
6
- 7  
8 19. Todd KH, Ducharme J, Choiniere M, et al. Pain in the emergency department:  
9 results of the pain and emergency medicine initiative (PEMI) multicenter study. *J*  
10 *Pain* 2007;8:460-6.  
11  
12
- 13 20. Todd KH, Sloan EP, Chen C, et al. Survey of pain etiology, management  
14 practices and patient satisfaction in two urban emergency departments. *CJEM*  
15 2002;4:252-6.  
16  
17
- 18 21. Silka PA. Pain scores improve analgesic administration patterns for trauma  
19 patients in the emergency department. *Acad Emerg Med* 2004;11:264-70.  
20  
21
- 22 22. Stalnikowicz R, Mahamid R, Kaspi S, et al. Undertreatment of acute pain in the  
23 emergency department: a challenge. *Int J Qual Health Care* 2005;17:173-6.  
24  
25
- 26 23. Chen EH, Shofer FS, Dean AJ, et al. Gender disparity in analgesic treatment of  
27 emergency department patients with acute abdominal pain. *Acad Emerg Med*  
28 2008;15:414-8.  
29  
30
- 31 24. Singer AJ, Garra G, Chohan JK, et al. Triage pain scores and the desire for and  
32 use of analgesics. *Ann Emerg Med* 2008;52:689-95.  
33  
34
- 35 25. Yakuna M, Soffer D, Halpern P, et al. An interventional study to improve the  
36 quality of analgesia in the emergency department. *CJEM* 2008;10:435-9.  
37  
38
- 39 26. Pines JM, Shofer FS, Isserman JA, et al. The effect of emergency department  
40 crowding on analgesia in patients with back pain in two hospitals. *Acad Emerg*  
41 *Med* 2010;17:276-83.  
42  
43
- 44 27. Grant PS. Analgesia delivery in the ED. *Am J Emerg Med* 2006;24:806-9.  
45  
46  
47  
48  
49  
50  
51  
52  
53  
54  
55  
56  
57  
58  
59  
60

- 1  
2  
3  
4  
5  
6  
7  
8  
9  
10  
11  
12  
13  
14  
15  
16  
17  
18  
19  
20  
21  
22  
23  
24  
25  
26  
27  
28  
29  
30  
31  
32  
33  
34  
35  
36  
37  
38  
39  
40  
41  
42  
43  
44  
45  
46  
47  
48  
49  
50  
51  
52  
53  
54  
55  
56  
57  
58  
59  
60
28. Dunwoody CJ, Krenzischek DA, Pasero C, et al. Assessment, physiological monitoring, and consequences of inadequately treated acute pain. *Pain Manag Nurs* 2008;9:11-21.
  29. Morrison RS, Magaziner J, Gilbert M, et al., Relationship between pain and opioid analgesics on the development of delirium following hip fracture. *J Gerontol A Biol Sci Med Sci* 2003;58:76-81.
  30. Gonzalez ER, Bahal N, Hansen LA, et al. Intermittent injection vs patient-controlled analgesia for sickle cell crisis pain. Comparison in patients in the emergency department. *Arch Intern Med* 1991;151:1373-78.
  31. Gardner RL, Sarkar U, Maselli JH, et al. Factors associated with longer ED lengths of stay. *Am J Emerg Med* 2007;25:643-50.
  32. Aubrun F, Langeron O, Quesnel C, et al. Relationships between measurement of pain using visual analog score and morphine requirements during postoperative intravenous morphine titration. *Anesthesiology* 2003;98:1415-21.
  33. Macintyre PE, Scott DA, Schug SA, et al. Acute Pain Management: Scientific Evidence, 3<sup>rd</sup> edition. Australian and New Zealand College of Anaesthetists. 2010; p. 491.
  34. Smith S, Radcliffe J. Guidelines for the management of pain in adults. Clinical Guidelines 2010.
  35. Moore A, McQuay H, Gavaghan D, et al. Deriving dichotomous outcome measures from continuous data in randomised controlled trials of analgesics. *Pain* 1996;66:229-37.

- 1  
2  
3  
4  
5  
6  
7  
8  
9  
10  
11  
12  
13  
14  
15  
16  
17  
18  
19  
20  
21  
22  
23  
24  
25  
26  
27  
28  
29  
30  
31  
32  
33  
34  
35  
36  
37  
38  
39  
40  
41  
42  
43  
44  
45  
46  
47  
48  
49  
50  
51  
52  
53  
54  
55  
56  
57  
58  
59  
60
36. Moore A, McQuay H, Gavaghan D, et al. Deriving dichotomous outcome measures from continuous data in randomised controlled trials of analgesics: verification from independent data. *Pain* 1997;69:127-30.
  37. Joint Commission on Accreditation Healthcare Organizations, Pain: current understanding of assessment, management, and treatments. 2001; p. 92.
  38. Carns P. Healthcare Guideline: Assessment and Management of Acute Pain, 6<sup>th</sup> edition. Institute for Clinical Systems Improvement. 2008; p. 58.
  39. Boyd RJ. The efficacy of structured assessment and analgesia provision in the paediatric emergency department. *Emerg Med J* 2005;22:30-2.
  40. Vazirani J, Knott JC. Mandatory pain scoring at triage reduces time to analgesia. *Ann Emerg Med* 2012;59:134-38.
  41. National Institute of Clinical Studies - National Emergency Department Collaborative Final Report, Melbourne Australia's, April 2004.
  42. Beveridge RC, Clarke B, Janes L, et al. Implementation guidelines for the Canadian Emergency Department Triage and Acuity Scale. Endorsed by the Canadian Association Of Emergency Physicians (CAEP), the National Emergency Nurses Affiliation of Canada (NENA), and L'association des médecins d'urgence du Québec (AMUQ). 1998; p. 1-32.
  43. Wilson JE, Pendleton JM. Oligoanalgesia in the emergency department. *Am J Emerg Med* 1989;7:620-3.
  44. Schull MJ, Guttman A, Leaver CA, et al. Prioritizing performance measurement for emergency department care: consensus on evidence-based quality of care indicators. *CJEM* 2011;13:300-9.

- 1  
2  
3  
4  
5  
6  
7  
8  
9  
10  
11  
12  
13  
14  
15  
16  
17  
18  
19  
20  
21  
22  
23  
24  
25  
26  
27  
28  
29  
30  
31  
32  
33  
34  
35  
36  
37  
38  
39  
40  
41  
42  
43  
44  
45  
46  
47  
48  
49  
50  
51  
52  
53  
54  
55  
56  
57  
58  
59  
60
45. Bendall JC, Simpson PM, Middleton PM, et al. Effectiveness of prehospital morphine, Fentanyl, and Methoxyflurane in pediatric patients. *Prehosp Emerg Care* 2011;15:158-65.
46. Krauss WC, Shah S, Shah S, et al. Fentanyl in the out-of-hospital setting: variables associated with hypotension and hypoxemia. *J Emerg Med* 2011;40:182-7.

## FIGURE LEGENDS

**Figure 1:** Median length of stay for subjects with adequate and inadequate pain relief in discharged and admitted patients.

**Figure 2:** Median length of stay for subjects receiving analgesia <90 min versus ≥90 min from arrival in discharged and admitted patients.

1  
2  
3  
4  
5  
6  
7  
8  
9  
10  
11  
12  
13  
14  
15  
16  
17  
18  
19  
20  
21  
22  
23  
24  
25  
26  
27  
28  
29  
30  
31  
32  
33  
34  
35  
36  
37  
38  
39  
40  
41  
42  
43  
44  
45  
46  
47  
48  
49  
50  
51  
52  
53  
54  
55  
56  
57  
58  
59  
60

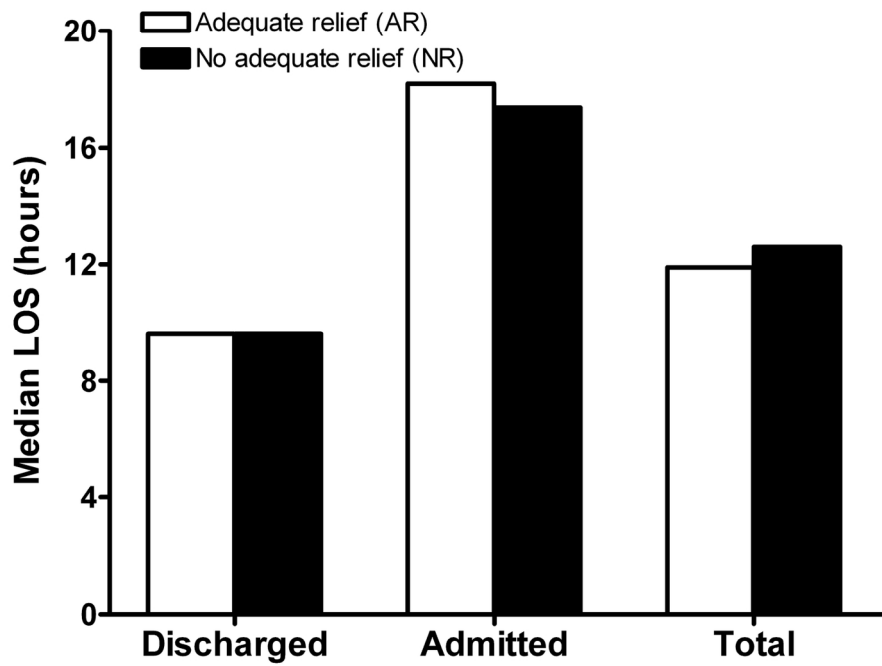

Figure 1: Median length of stay for subjects with adequate and inadequate pain relief in discharged and admitted patients.  
152x121mm (300 x 300 DPI)

1  
2  
3  
4  
5  
6  
7  
8  
9  
10  
11  
12  
13  
14  
15  
16  
17  
18  
19  
20  
21  
22  
23  
24  
25  
26  
27  
28  
29  
30  
31  
32  
33  
34  
35  
36  
37  
38  
39  
40  
41  
42  
43  
44  
45  
46  
47  
48  
49  
50  
51  
52  
53  
54  
55  
56  
57  
58  
59  
60

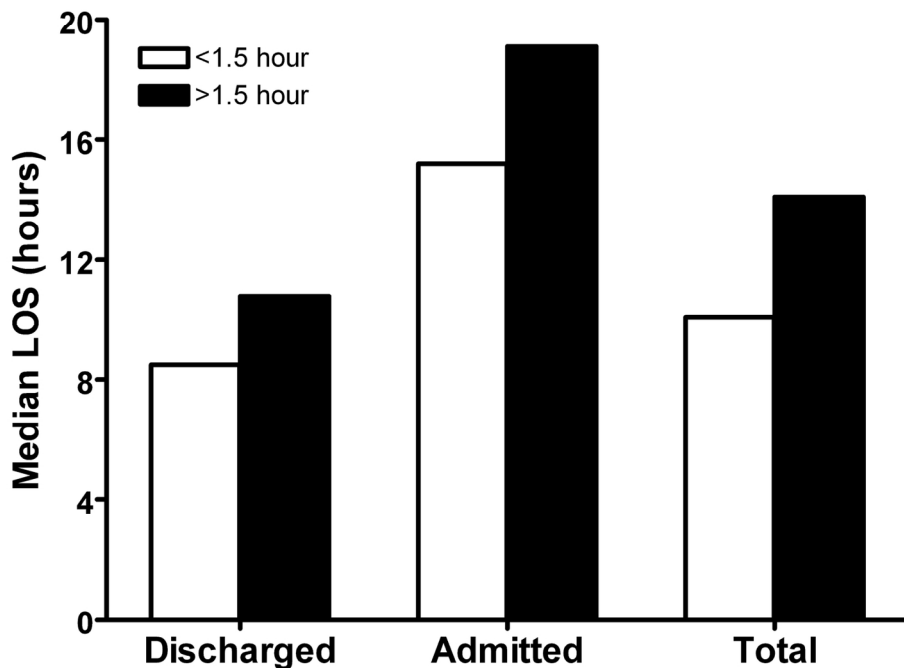

Figure 2: Median length of stay for subjects receiving analgesia <90 min versus >=90 min from arrival in discharged and admitted patients.  
148x118mm (300 x 300 DPI)

view only

## STROBE Statement—checklist of items that should be included in reports of observational studies

|                              | Item No | Recommendation                                                                                                                                                                                                                                                                                                                                                                                                                                                                                                                                                                                                                                                                                               |
|------------------------------|---------|--------------------------------------------------------------------------------------------------------------------------------------------------------------------------------------------------------------------------------------------------------------------------------------------------------------------------------------------------------------------------------------------------------------------------------------------------------------------------------------------------------------------------------------------------------------------------------------------------------------------------------------------------------------------------------------------------------------|
| <b>Title and abstract</b>    | 1       | (a) Indicate the study's design with a commonly used term in the title or the abstract<br><b>Done</b><br>(b) Provide in the abstract an informative and balanced summary of what was done and what was found <b>Done</b>                                                                                                                                                                                                                                                                                                                                                                                                                                                                                     |
| <b>Introduction</b>          |         |                                                                                                                                                                                                                                                                                                                                                                                                                                                                                                                                                                                                                                                                                                              |
| Background/rationale         | 2       | Explain the scientific background and rationale for the investigation being reported<br><b>Done</b>                                                                                                                                                                                                                                                                                                                                                                                                                                                                                                                                                                                                          |
| Objectives                   | 3       | State specific objectives, including any prespecified hypotheses <b>Done</b>                                                                                                                                                                                                                                                                                                                                                                                                                                                                                                                                                                                                                                 |
| <b>Methods</b>               |         |                                                                                                                                                                                                                                                                                                                                                                                                                                                                                                                                                                                                                                                                                                              |
| Study design                 | 4       | Present key elements of study design early in the paper <b>Done</b>                                                                                                                                                                                                                                                                                                                                                                                                                                                                                                                                                                                                                                          |
| Setting                      | 5       | Describe the setting, locations, and relevant dates, including periods of recruitment, exposure, follow-up, and data collection <b>Done</b>                                                                                                                                                                                                                                                                                                                                                                                                                                                                                                                                                                  |
| Participants                 | 6       | (a) <i>Cohort study</i> —Give the eligibility criteria, and the sources and methods of selection of participants. Describe methods of follow-up<br><i>Case-control study</i> —Give the eligibility criteria, and the sources and methods of case ascertainment and control selection. Give the rationale for the choice of cases and controls<br><i>Cross-sectional study</i> —Give the eligibility criteria, and the sources and methods of selection of participants <b>Done</b><br>(b) <i>Cohort study</i> —For matched studies, give matching criteria and number of exposed and unexposed<br><i>Case-control study</i> —For matched studies, give matching criteria and the number of controls per case |
| Variables                    | 7       | Clearly define all outcomes, exposures, predictors, potential confounders, and effect modifiers. Give diagnostic criteria, if applicable <b>Done</b>                                                                                                                                                                                                                                                                                                                                                                                                                                                                                                                                                         |
| Data sources/<br>measurement | 8*      | For each variable of interest, give sources of data and details of methods of assessment (measurement). Describe comparability of assessment methods if there is more than one group <b>Done</b>                                                                                                                                                                                                                                                                                                                                                                                                                                                                                                             |
| Bias                         | 9       | Describe any efforts to address potential sources of bias <b>Done</b>                                                                                                                                                                                                                                                                                                                                                                                                                                                                                                                                                                                                                                        |
| Study size                   | 10      | Explain how the study size was arrived at <b>Not applicable</b>                                                                                                                                                                                                                                                                                                                                                                                                                                                                                                                                                                                                                                              |
| Quantitative variables       | 11      | Explain how quantitative variables were handled in the analyses. If applicable, describe which groupings were chosen and why <b>Done</b>                                                                                                                                                                                                                                                                                                                                                                                                                                                                                                                                                                     |
| Statistical methods          | 12      | (a) Describe all statistical methods, including those used to control for confounding<br><b>Done</b><br>(b) Describe any methods used to examine subgroups and interactions <b>Not applicable</b><br>(c) Explain how missing data were addressed <b>Done</b><br>(d) <i>Cohort study</i> —If applicable, explain how loss to follow-up was addressed<br><i>Case-control study</i> —If applicable, explain how matching of cases and controls was addressed<br><i>Cross-sectional study</i> —If applicable, describe analytical methods taking account of sampling strategy<br>(e) Describe any sensitivity analyses <b>Not applicable</b>                                                                     |



Continued on next page

## Results

|                  |     |                                                                                                                                                                                                                                                                                                                                                                                                                                       |
|------------------|-----|---------------------------------------------------------------------------------------------------------------------------------------------------------------------------------------------------------------------------------------------------------------------------------------------------------------------------------------------------------------------------------------------------------------------------------------|
| Participants     | 13* | (a) Report numbers of individuals at each stage of study—eg numbers potentially eligible, examined for eligibility, confirmed eligible, included in the study, completing follow-up, and analysed <b>Done</b><br>(b) Give reasons for non-participation at each stage <b>Done</b><br>(c) Consider use of a flow diagram                                                                                                               |
| Descriptive data | 14* | (a) Give characteristics of study participants (eg demographic, clinical, social) and information on exposures and potential confounders <b>Done</b><br>(b) Indicate number of participants with missing data for each variable of interest <b>Done</b><br>(c) <i>Cohort study</i> —Summarise follow-up time (eg, average and total amount)                                                                                           |
| Outcome data     | 15* | <i>Cohort study</i> —Report numbers of outcome events or summary measures over time<br><i>Case-control study</i> —Report numbers in each exposure category, or summary measures of exposure<br><i>Cross-sectional study</i> —Report numbers of outcome events or summary measures <b>Done</b>                                                                                                                                         |
| Main results     | 16  | (a) Give unadjusted estimates and, if applicable, confounder-adjusted estimates and their precision (eg, 95% confidence interval). Make clear which confounders were adjusted for and why they were included <b>Done</b><br>(b) Report category boundaries when continuous variables were categorized <b>Done</b><br>(c) If relevant, consider translating estimates of relative risk into absolute risk for a meaningful time period |
| Other analyses   | 17  | Report other analyses done—eg analyses of subgroups and interactions, and sensitivity analyses                                                                                                                                                                                                                                                                                                                                        |

## Discussion

|                  |    |                                                                                                                                                                                        |
|------------------|----|----------------------------------------------------------------------------------------------------------------------------------------------------------------------------------------|
| Key results      | 18 | Summarise key results with reference to study objectives <b>Done</b>                                                                                                                   |
| Limitations      | 19 | Discuss limitations of the study, taking into account sources of potential bias or imprecision. Discuss both direction and magnitude of any potential bias <b>Done</b>                 |
| Interpretation   | 20 | Give a cautious overall interpretation of results considering objectives, limitations, multiplicity of analyses, results from similar studies, and other relevant evidence <b>Done</b> |
| Generalisability | 21 | Discuss the generalisability (external validity) of the study results <b>Done</b>                                                                                                      |

## Other information

|         |    |                                                                                                                                                                           |
|---------|----|---------------------------------------------------------------------------------------------------------------------------------------------------------------------------|
| Funding | 22 | Give the source of funding and the role of the funders for the present study and, if applicable, for the original study on which the present article is based <b>Done</b> |
|---------|----|---------------------------------------------------------------------------------------------------------------------------------------------------------------------------|

\*Give information separately for cases and controls in case-control studies and, if applicable, for exposed and unexposed groups in cohort and cross-sectional studies.

**Note:** An Explanation and Elaboration article discusses each checklist item and gives methodological background and published examples of transparent reporting. The STROBE checklist is best used in conjunction with this article (freely available on the Web sites of PLoS Medicine at <http://www.plosmedicine.org/>, Annals of Internal Medicine at <http://www.annals.org/>, and Epidemiology at <http://www.epidem.com/>). Information on the STROBE Initiative is available at [www.strobe-statement.org](http://www.strobe-statement.org).



**Impact of adequate pain relief on emergency department length of stay.**

|                                 |                                                                                                                                                                                                                                                          |
|---------------------------------|----------------------------------------------------------------------------------------------------------------------------------------------------------------------------------------------------------------------------------------------------------|
| Journal:                        | <i>BMJ Open</i>                                                                                                                                                                                                                                          |
| Manuscript ID:                  | bmjopen-2013-004288.R1                                                                                                                                                                                                                                   |
| Article Type:                   | Research                                                                                                                                                                                                                                                 |
| Date Submitted by the Author:   | 22-Jan-2014                                                                                                                                                                                                                                              |
| Complete List of Authors:       | Sokoloff, Catalina; Hôpital Sacré-Coeur de Montréal, Emergency<br>Daoust, Raoul; Hôpital Sacré-Coeur de Montréal, Emergency<br>Paquet, Jean; Hôpital Sacré-Coeur de Montréal, Emergency<br>Chauny, Jean-Marc; Hôpital Sacré-Coeur de Montréal, Emergency |
| <b>Primary Subject Heading</b>: | Emergency medicine                                                                                                                                                                                                                                       |
| Secondary Subject Heading:      | Emergency medicine, Health services research                                                                                                                                                                                                             |
| Keywords:                       | Pain management < ANAESTHETICS, ACCIDENT & EMERGENCY MEDICINE,<br>Organisation of health services < HEALTH SERVICES ADMINISTRATION &<br>MANAGEMENT                                                                                                       |
|                                 |                                                                                                                                                                                                                                                          |

SCHOLARONE™  
Manuscripts

1  
2  
3 **Impact of adequate pain relief on emergency department length of stay.**  
4  
5  
6  
7

8 **Corresponding author:** Raoul Daoust  
9 5400 boul. Gouin Ouest,  
10 Montréal, Québec, Canada,  
11 H4J 1C5.  
12 T: 514-338-2222#3318  
13 Fax : 514-338-3513  
14 [raoul.daoust@videotron.ca](mailto:raoul.daoust@videotron.ca)  
15  
16  
17  
18  
19

20 Catalina Sokoloff, MD, <sup>a,b</sup>, Raoul Daoust, MD, MSc<sup>a,b</sup>, Jean Paquet, PhD<sup>a,c</sup>, Jean-Marc  
21 Chauny, MD, MSc<sup>a,b</sup>,  
22  
23  
24  
25

26 <sup>a</sup>Department of Emergency Medicine, Research Centre, Hôpital du Sacré-Cœur de  
27 Montréal, Montréal, Québec, Canada  
28

29 <sup>b</sup>Faculty of Medicine, Université de Montréal, Montréal, Québec, Canada  
30

31 <sup>c</sup>Centre for Advanced Research in Sleep Medicine and Department of Surgery, Hôpital du  
32 Sacré-Coeur de Montréal, Montreal, Quebec, Canada  
33  
34  
35  
36

37 **Keywords :** Analgesia, Length of Stay, Emergency department, Pain relief  
38  
39  
40  
41  
42

43 **Word count (excluding abstract):** 2 353  
44  
45  
46  
47  
48  
49  
50  
51  
52  
53  
54  
55  
56  
57  
58  
59  
60

## ABSTRACT

**Objectives:** Evaluate the influence of adequate analgesia and time to analgesic treatment on emergency department (ED) length of stay (LOS).

**Setting and Design:** Post-hoc analysis of real time archived data.

**Participants:** We included all consecutive ED patients  $\geq 18$  years with pain intensity  $>6$  (verbal numerical scale from 0 to 10), assigned to an ED bed, and whose pain was re-evaluated less than 1 hour after receiving analgesic treatment.

**Outcome measures:** The main outcome was ED-LOS in patients who had adequate pain relief (AR =  $\downarrow 50\%$  pain intensity) compared to those who did not have such relief (NR).

**Results:** A total of 2,033 patients (mean age 49.5 years; 51% men) met our inclusion criteria; 58.3% were discharged, and 41.7% were admitted. Among patients discharged or admitted, there was no significant difference in ED-LOS between those with AR (median [25th-75th percentile]: 9.6 hours [6.3-14.8] and 18.2 hours [11.6-25.7], respectively) and NR (median [25th-75th percentile]: 9.6 hours [6.6-16.0] and 17.4 hours [11.3-26.5], respectively). After controlling for confounding factors, rapid time to analgesia (and not adequate pain relief) was associated with shorter ED-LOS of both discharged and admitted patients ( $p < 0.001$  and  $p < 0.05$  respectively). When adjusting for confounding variables, ED-LOS is shortened by 2 hours when delay to receive analgesic is  $<90$  min compared to  $>90$  min for discharged and by 2.3 hours for admitted patients.

**Conclusions:** In our study, adequate pain relief was not linked with short ED-LOS.

However, rapid administration of analgesia was associated with short ED-LOS.

## ARTICLE SUMMARY

### Strengths and limitations of this study

-This is a rare study that examines the relationship between pain relief and length of stay controlling for multiple confounding variables in a large cohort of emergency department patients.

-The main limitation of our study is its post hoc design and pre-formed database from a single-centre study in an academic hospital.

For peer review only

## INTRODUCTION

Emergency department (ED) overcrowding has been a concern for many years, and Canada is no exception, with nearly 60% of EDs reporting that problem in 2007.<sup>1</sup> The phenomenon of “boarding” is one of the principal factors identified as its cause.<sup>2,3</sup> “Boarding” (or “access block”) refers to situations where bedridden emergency patients wait for the allocation of a bed on the ward for an unreasonably long time period (prolong ED length of stay) with consequent patient overflow in EDs. However, a recent retrospective study revealed that among patients waiting more than 6 hours in the ED, 50% were finally admitted while the other 50% were discharged,<sup>4</sup> indicating that non-boarding patients length of stay (LOS) also contribute to overcrowding. It has been shown to be a strong predictor of low satisfaction among patients<sup>5</sup> and healthcare workers.<sup>1</sup> It is also associated with long hospital LOS,<sup>6,7</sup> and high short- and medium-term mortality rates.<sup>8-10</sup> Furthermore, overcrowding is linked with reduced timeliness and quality of interventions and treatments,<sup>11-13</sup> including delayed analgesic administration,<sup>14,15</sup> particularly when pain is severe,<sup>16</sup> all of which contribute to the snowball effect of cumulating waits.

Pain represents more than 40% of consultations in EDs.<sup>17</sup> In large studies of patients with moderate to severe pain, only 21 to 68%<sup>18-27</sup> received analgesics, and 50 to 74% still had moderate to severe pain at discharge.<sup>17</sup> Severe, persistent pain may also lead to unwanted physiological responses, namely, increased adrenergic tone, augmented oxygen consumption, predisposition to hypercoagulability, decreased immune function, and heightened risk of delirium.<sup>28,29</sup> Moreover, adequate and timely treatment of acute

1  
2  
3 pain could reduce the risk of chronic pain.<sup>17</sup> The relationship between pain management  
4 and LOS has not been studied has a primary outcome. However, a study of intermittent  
5 injection vs patient-controlled analgesia (PCA) for sickle cell crisis pain in the ED,  
6 established that PCA was associated with a significant reduction in length of ED stay,  
7 although there was no difference in initial or final pain intensity score<sup>30</sup>.  
8  
9

10  
11  
12  
13  
14  
15 Recent studies have attempted to identify the factors contributing to prolonged  
16 ED-LOS. Many of them have already been recognized, namely, number of laboratory  
17 examinations required, having to undergo X-ray or scan, the need for more than 3  
18 medications, and number of consultants.<sup>10,31</sup> To the best of our knowledge, the adequacy  
19 and effectiveness of pain management have never been investigated in this regard. We  
20 sought to evaluate which component of initial pain management was associated with ED-  
21 LOS reduction. We hypothesized that ED-LOS would be lessened in patients with  
22 significant pain relief.  
23  
24  
25  
26  
27  
28  
29  
30  
31  
32  
33  
34  
35

## 36 MATERIALS AND METHODS

### 37 Study design

38  
39 We conducted *post hoc* analysis of real time archived data on all consecutive  
40 patients presenting with severe pain at our ED between March 2008 and February 2011.  
41  
42 The aim of our study was to assess if pain relief was associated with ED-LOS reduction.  
43  
44 As a secondary objective, we evaluated if time to receiving analgesic treatment was  
45  
46 linked with lessened ED-LOS.  
47  
48  
49  
50  
51  
52  
53  
54

### 55 Setting

1  
2  
3 Hôpital du Sacré-Cœur de Montreal is an urban, adult, level I trauma center with  
4  
5 540 inpatient beds and 60,000 ED visits per year. It sustains 22,000 hospitalizations  
6  
7 annually, of which 51% are admitted through the ED. The study was approved by the  
8  
9 institutional review board.  
10  
11

### 12 13 14 15 **Selection of participants**

16  
17 Patients 18 years or older were included if they were assigned to an ED treatment  
18  
19 bed, had severe pain at triage (defined as >6 on an 11-point verbal numerical scale from 0  
20  
21 to 10),<sup>32-34</sup> received an analgesic, and had their pain intensity re-evaluated in less than 1  
22  
23 hour after such medication.  
24  
25

26  
27 Patients were excluded if they died during their ED stay, were pregnant or had  
28  
29 been transferred from another hospital. We also excluded patients with altered mental  
30  
31 status, intoxicated subjects, and anyone with chest pain necessitating emergent PCI,  
32  
33 because their LOS could be determined by treatments other than pain management.  
34  
35

### 36 37 38 **Data collection**

39  
40 Data were extracted from computerized information and nursing records in our  
41  
42 ED (MedUrge<sup>TM</sup>, MediaMed Technologies, Mont-Saint-Hilaire, Québec, Canada). This  
43  
44 system is an integrated and mandatory working tool for all physicians, nursing staff, and  
45  
46 any employee involved in the ED healthcare process. It contains all demographic data,  
47  
48 triage information (including vital signs, purpose of consultation, and pain level when  
49  
50 relevant) as well as any pertinent data collected in real time by nurses during their re-  
51  
52 evaluation rounds, including medication administration, and pain intensity.  
53  
54  
55  
56  
57  
58  
59  
60



## Data processing

The cut-off of >6 on 10 was chosen because it was felt that lower pain intensity is less likely to warrant observation in itself. ED-LOS was measured in hours from the time of arrival at the ED to discharge or admission to a ward. We defined adequate pain relief (AR) as reduction of 50% or more of the initial pain level scored on the numerical scale within 1 hour after receiving the first analgesic. The 50% reduction and the 1-hour threshold are based on previous literature suggesting that they represent a meaningful decline<sup>35,36</sup> and acceptable delay in managing severe pain.<sup>34,37,38</sup> Initial pain was the one reported on the triage form. Time between arrival and analgesic administration was dichotomized into  $\leq 90$  minutes versus  $>90$  minutes and also analyzed by three category (<1 hour; between 1 and 2 hour; >2 hour). We selected a 90-minute threshold because it is the median time to analgesia reported in many EDs with a pain scale integrated in their triage assessment.<sup>19,39,40</sup>

Our primary outcome was ED-LOS of patients with and without adequate pain relief. Our secondary outcome was ED-LOS of patients who received their medication in  $\leq 90$  minutes compared to those who received it after a longer time period.

## Data analysis

Median LOS (25th-75th percentile) between groups of patients was compared by the Mann-Whitney U test and relationship among LOS and continuous predictors by Spearman rank-order correlations. All LOS are presented in hours and separately for patients with intravenous versus patients with other than intravenous route of analgesia

1  
2  
3 administration. To examine the relative influence of adequate pain relief and time to  
4  
5 analgesia on LOS, generalized linear model regressions with Gamma distribution and a  
6  
7 log link function were undertaken for patients discharged from the ED and those admitted  
8  
9 to a ward, controlling for age, gender, route of analgesia administration (IV vs other),  
10  
11 number of dose of analgesia, type of arrival at ED (ambulance or walk in), triage priority  
12  
13 (high vs low), crowding defined as number of patients in ED beds at the time of arrival,  
14  
15 time of day of arrival with high or low LOS (calculated from a database of 162 000  
16  
17 patients of 18 years or older assigned to a bed between March 2008 and February 2011  
18  
19 from the same ED and selecting hours of arrival with high LOS and hours of arrival with  
20  
21 low LOS), time between arrival and physician's first assessment, number of  
22  
23 examinations, number of specialty consultations, baseline pain intensity score, trauma  
24  
25 versus non-trauma, abdominal pain versus other, need for oxygen and for isolation.  
26  
27 Generalized linear model was chosen because LOS is largely skewed and tends to  
28  
29 produce less prediction errors than traditional linear regression<sup>41</sup>. Mean LOS difference  
30  
31 and Wald 95% CI adjusted at mean covariates were produced from estimated marginal  
32  
33 means. The Canadian healthcare system being public and free, the presence or absence of  
34  
35 insurance was not analyzed. Alpha level was set at 0.05 for all statistical tests. All data  
36  
37 were analyzed with SPSS version 20 (IBM, Somers, NY).  
38  
39  
40  
41  
42  
43  
44  
45  
46  
47

## 48 RESULTS

49  
50 A total of 2,033 patients met our inclusion and exclusion criteria. Of these  
51  
52 patients, about half (51%) were male, more than two third arrived at ED alone, 1,186  
53  
54 (58.3%) were finally discharged and 847 were admitted (Table 1).  
55  
56  
57  
58  
59  
60

Among patients who were discharged from the ED, 45.7% had AR compared to 40.3% of admitted patients. There was no significant difference in ED-LOS between patients with AR compared to those without adequate relief (NR) ( $p=0.41$  for discharged patients and  $p=0.87$  for admitted patients) (Figure 1).

Table 1. Patient characteristics of the whole sample

| Characteristics                                | Total (N=2,033) |
|------------------------------------------------|-----------------|
| Mean age ( $\pm$ SD)                           | 49.5 (17.0)     |
| % male                                         | 51.0            |
| % Triage priority                              |                 |
| -high (1-2)                                    | 45.3            |
| -low (3-4-5)                                   | 54.7            |
| % Arrival                                      |                 |
| -ambulance                                     | 29.2            |
| -walk in                                       | 70.8            |
| % -admitted                                    | 41.7            |
| -discharged                                    | 58.3            |
| % -treated with opiates only                   | 66.7            |
| -treated with non-opiates only                 | 11.1            |
| -treated with combination                      | 22.2            |
| % Route of analgesia administration            |                 |
| -IV                                            | 62.0            |
| -other                                         | 38.0            |
| % with trauma injury                           | 7.6             |
| % with abdominal pain                          | 39.5            |
| % with blood test                              | 6.4             |
| % with heart-rate monitoring                   | 11.7            |
| % with oxygen support                          | 9.5             |
| % in isolation                                 | 4.5             |
| Mean ( $\pm$ SD) baseline pain intensity score | 8.8 (1.1)       |
| Mean ( $\pm$ SD) final pain intensity score    | 5.1 (3.0)       |

|                                                                                           |                 |
|-------------------------------------------------------------------------------------------|-----------------|
| Median LOS in hours (25th-75th percentile)                                                | 12.3 (7.8-20.3) |
| Median time between arrival at ED and analgesic treatment in hours (25th-75th percentile) | 1.8 (1.1-3.2)   |
| Median time to patient care by physician in hours (25th-75th percentile)                  | 0.72 (0.42-1.4) |

---

LOS: length of stay

Among patients who were discharged from the ED, 533 (45%) received analgesia  $\leq 90$  minutes, with ED-LOS reduction of 2.3 hours ( $p < 0.001$ ) compared to those with  $> 90$  minutes. The same analysis was applied to patients being admitted: only 265 (31%) received their medication in that interval, and their median ED-LOS reduction was 3.9 hours ( $p < 0.001$ ) (Figure 2). Median ED-LOS for three different times to receive analgesia is displayed in table 2.

Table 2. Median length of stay (25th-75th percentiles) for three different times to receive analgesia controlled for route of analgesia administration for discharged and admitted patients.

| Confounding variables                 | IV LOS in hour<br>Median (25th-75th<br>percentile) | Other than IV LOS<br>in hour<br>Median (25th-75th<br>percentile) |
|---------------------------------------|----------------------------------------------------|------------------------------------------------------------------|
| Discharged patients:                  | (N=698)                                            | (N=481)                                                          |
| Time to receive analgesia: $< 1$ hour | 8.6 (6.0-11.8)                                     | 6.6 (4.4-9.5)                                                    |
| -from 1 to 2 hour                     | 10.5 (6.9-15.9)                                    | 8.2 (5.4-12.2)                                                   |
| - $> 2$ hour                          | 12.9 (8.9-18.0)                                    | 10.1 (6.3-19.2)                                                  |
| Admitted patients:                    | (N=556)                                            | (N=289)                                                          |
| Time to receive analgesia: $< 1$ hour | 16.4 (10.8-23.8)                                   | 17.2 (10.7-24.8)                                                 |
| -from 1 to 2 hour                     | 14.9 (10.4-22.6)                                   | 18.1 (10.0-26.4)                                                 |
| - $> 2$ hour                          | 18.7 (11.6-27.4)                                   | 19.6 (12.9-28.7)                                                 |

LOS: length of stay; IV: intravenous route of analgesia administration; without IV: other than intravenous route of analgesia administration

Table 3 and 4 show the bivariate relations between LOS and all confounding variables controlled for route of analgesia administration for discharged and admitted patients respectively. For discharged patients with IV route of analgesia administration, only type of arrival, crowding and baseline pain intensity score were not related to LOS while for other than IV route of analgesia administration, type of arrival, triage priority, oxygen support, time of day LOS, crowding and baseline pain intensity score were not associated with LOS. For admitted patients with IV route of analgesia administration, triage priority, type of arrival, blood testing, time of day LOS, crowding, number of dose and baseline pain intensity score were not related to LOS while for other than IV route of analgesia administration, gender, triage priority, type of arrival, trauma injury, abdominal pain, time of day LOS and physician taking charge delay were not associated with LOS.

Table 3. Relationship between length of stay and all confounding variables for **discharged** patients.

| Confounding variables        | IV LOS in hour<br>(N=702)        | Other than IV LOS in<br>hour (N=484) |
|------------------------------|----------------------------------|--------------------------------------|
| Categorical confounders:     | Median (25th-75th<br>percentile) | Median (25th-75th<br>percentile)     |
| Gender: -male                | 9.5 (6.7-15.0)**                 | 8.0 (5.5-12.3)**                     |
| -female                      | 11.1 (7.9-16.9)                  | 9.8 (6.1-18.4)                       |
| Triage priority: -high (1-2) | 9.7 (6.7-15.3)**                 | 8.8 (5.8-13.1)                       |
| -low (3-4-5)                 | 10.8 (7.9-17.0)                  | 8.8 (5.8-15.0)                       |
| Arrival: -ambulance          | 10.8 (7.3-16.3)                  | 8.8 (5.7-15.5)                       |
| -walk in                     | 10.0 (7.2-15.7)                  | 8.7 (5.8-13.5)                       |
| Trauma injury: -Yes          | 7.1 (4.1-13.0)**                 | 6.4 (4.6-12.7)**                     |

|                                                |                                 |                                 |
|------------------------------------------------|---------------------------------|---------------------------------|
| -No                                            | 10.4 (7.3-15.9)                 | 9.0 (5.9-14.8)                  |
| Abdominal pain: -Yes                           | 11.3 (7.8-17.5)**               | 10.5 (5.7-13.4)**               |
| -No                                            | 9.6 (6.9-14.6)                  | 8.3 (6.9-14.6)                  |
| Blood test: -Yes                               | 16.4 (10.2-23.6)**              | 18.5 (11.6-25.0)**              |
| -No                                            | 10.0 (7.1-15.5)                 | 8.6 (5.8-13.8)                  |
| Heart-rate monitoring: -Yes                    | 14.6 (10.6-24.4)**              | 12.7 (9.2-27.8)**               |
| -No                                            | 9.8 (6.9-15.2)                  | 8.2 (5.7-13.4)                  |
| Oxygen support: -Yes                           | 13.5 (8.7-23.0)**               | 10.4 (8.7-23.0)                 |
| -No                                            | 10.0 (7.1-15.4)                 | 8.6 (5.7-14.0)                  |
| Isolation: -Yes                                | 22.7 (11.3-36.7)**              | 22.6 (11.7-44.3)**              |
| -No                                            | 10.0 (7.1-15.7)                 | 8.6 (5.8-13.5)                  |
| Time of day of arrival with: -low LOS          | 9.0 (7.1-10.7)**                | 8.6 (6.1-10.4)                  |
| -high LOS                                      | 11.1 (7.2-16.9)                 | 8.8 (5.7-15.2)                  |
| Continuous confounders:                        | Spearman rank-order correlation | Spearman rank-order correlation |
| Age:                                           | 0.18**                          | 0.09*                           |
| Crowding:                                      | 0.06                            | -0.06                           |
| Physician taking charge delay:                 | 0.21**                          | 0.19**                          |
| Number of exams (range 0-15):                  | 0.33**                          | 0.29**                          |
| Number of specialist consultation (range 0-8): | 0.41**                          | 0.44**                          |
| Number of dose (range 1-7):                    | -0.13**                         | -0.10*                          |
| Baseline pain intensity score:                 | -0.06                           | -0.01                           |

LOS : length of stay; IV: intravenous route of analgesia administration; other than IV: other than intravenous route of analgesia administration; \*p<0.05; \*\*p<0.01

Table 4. Relationship between length of stay and all confounding variables for **admitted** patients.

| Confounding variables    | IV LOS in hour (N=558)        | Other than IV LOS in hour (N=289) |
|--------------------------|-------------------------------|-----------------------------------|
| Categorical confounders: | Median (25th-75th percentile) | Median (25th-75th percentile)     |
| Gender: -male            | 15.4 (10.5-23.6)*             | 18.9 (11.4-27.5)                  |
| -female                  | 18.0 (11.7-25.4)              | 19.5 (12.7-27.9)                  |

|                                                |                                 |                                 |
|------------------------------------------------|---------------------------------|---------------------------------|
| Triage priority: -high (1-2)                   | 16.4 (10.4-24.5)                | 18.4 (11.1-25.8)                |
| -low (3-4-5)                                   | 17.2 (11.7-25.0)                | 19.5 (12.9-27.6)                |
| Arrival: -ambulance                            | 17.0 (10.7-25.3)                | 20.7 (13.5-28.4)                |
| -walk in                                       | 16.6 (11.4-24.5)                | 18.4 (12.0-26.9)                |
| Trauma injury: -Yes                            | 12.5 (8.7-21.1)*                | 15.7 (8.2-27.6)                 |
| -No                                            | 17.0 (11.4-24.8)                | 19.4 (12.6-27.6)                |
| Abdominal pain: -Yes                           | 16.0 (10.9-23.3)*               | 19.4 (12.9-26.7)                |
| -No                                            | 18.0 (11.5-27.6)                | 19.3 (11.6-28.2)                |
| Blood test: -Yes                               | 19.8 (11.8-28.5)                | 27.9 (16.4-35.8)**              |
| -No                                            | 16.4 (10.9-24.5)                | 18.8 (11.6-26.8)                |
| Heart-rate monitoring: -Yes                    | 23.1 (16.2-38.6)**              | 30.0 (25.3-45.2)**              |
| -No                                            | 15.6 (10.7-23.1)                | 17.8 (11.3-25.7)                |
| Oxygen support: -Yes                           | 20.9 (12.3-34.4)**              | 26.8 (15.1-45.0)**              |
| -No                                            | 15.9 (10.8-24.1)                | 18.7 (11.7-26.7)                |
| Isolation: -Yes                                | 30.1 (21.8-54.3)**              | 35.5 (22.6-57.8)**              |
| -No                                            | 15.9 (10.8-23.8)                | 18.5 (11.6-26.7)                |
| Time of day of arrival with: -low LOS          | 15.7 (9.7-29.1)                 | 16.2 (10.6-24.2)                |
| -high LOS                                      | 17.0 (11.4-24.5)                | 19.8 (12.7-27.8)                |
| Continuous confounders:                        | Spearman rank-order correlation | Spearman rank-order correlation |
| Age:                                           | 0.15**                          | 0.22**                          |
| Crowding:                                      | 0.03                            | 0.17**                          |
| Physician taking charge delay:                 | 0.16**                          | 0.06                            |
| Number of exams (range 0-15):                  | 0.34**                          | 0.36**                          |
| Number of specialist consultation (range 0-8): | 0.31**                          | 0.37**                          |
| Number of dose (range 1-7):                    | -0.03                           | -0.15**                         |
| Baseline pain intensity score:                 | 0.003                           | -0.12*                          |

LOS : length of stay; IV: intravenous route of analgesia administration; other than IV: other than intravenous route of analgesia administration; \*p<0.05; \*\*p<0.01

Multivariate analysis showed that when controlling for confounding variables, a brief time period ( $\leq 90$  minutes) before analgesic administration (and not adequate pain relief) is associated with shortened ED-LOS for both discharged and admitted patients ( $\beta=0.16$ ; 95% confidence interval (95% CI): 0.10-0.22;  $p<0.001$  and  $\beta=0.09$ ; 95% CI:

1  
2  
3 0.006-0.18;  $p < 0.05$ , respectively). When adjusting for confounding variables, ED-LOS is  
4  
5 shortened by 2 hours (95%CI: 1.1-2.8;  $p < 0.001$ ) when time to receive analgesic is  $< 90$   
6  
7 min compared to  $> 90$  min for discharged and by 2.3 hours (95%CI: 0.17-4.4;  $p < 0.05$ ) for  
8  
9 admitted patients.  
10  
11

## 12 13 14 15 **LIMITATIONS**

16  
17 The main limitation of our study is its post hoc design and pre-formed database.  
18  
19 Potential confounding variables, such as ethnicity and linguistic barrier, which are not  
20  
21 recorded in demographic charts of our computerized system, could not be taken into  
22  
23 consideration. Time from pain onset, component of chronic pain and pharmacological or  
24  
25 non-pharmacological analgesia prior to arrival at the ED were also unknown. Case  
26  
27 complexity assessment was difficult, although we controlled for number of examinations,  
28  
29 number of consultants, need for oxygen and for isolation, which are markers of  
30  
31 complexity. Likewise, we do not know if some patients did not receive an analgesic nor  
32  
33 had suboptimal pain management because of refusal. However, it is doubtful that any of  
34  
35 these confounding variables would cause significant differential bias. Finally, our single-  
36  
37 center study in an academic hospital might limit the generalization of our results.  
38  
39  
40  
41  
42  
43  
44

## 45 46 **DISCUSSION**

47  
48 As far as we know, this is the first investigation to evaluate the impact of pain  
49  
50 relief on ED-LOS, and our results demonstrated that rapid administration of analgesia,  
51  
52 and not adequate pain relief, is associated with shorter ED-LOS. It has been reported that  
53  
54 patients expect to receive pain medication 25 to 30 minutes after their arrival,<sup>42</sup> which  
55  
56  
57  
58  
59  
60



1  
2  
3 coincides with the guidelines of our triage system (Canadian Emergency Department  
4 Triage and Acuity Scale).<sup>43</sup> Unfortunately, this goal is far from being achieved in many  
5  
6 EDs, not only in Canada, but also around the world.<sup>19,27,42</sup> This is a persistent problem  
7  
8 that dates back to the late 1980s when Wilson and Pendleton first defined the term  
9  
10 “oligoanalgesia”.<sup>44</sup>  
11  
12

13  
14  
15 More recently, the Pain and Emergency Medicine Initiative study demonstrated  
16  
17 that patient satisfaction was associated more with the way ED physicians responded to  
18  
19 their complaints of pain than to the actual result of pain treatment.<sup>19</sup> Which components  
20  
21 of this response to pain were significant was not specified, but a possible part of it was  
22  
23 the promptness with which pain was addressed. Patients with severe pain probably  
24  
25 associate receiving pain medication quickly with quality of care and are more inclined to  
26  
27 accept a medical treatment plan, even if they do not get relief. This might explain why  
28  
29 we observed improved ED-LOS with prompt analgesic administration in patients being  
30  
31 discharged or admitted.  
32  
33  
34  
35

36  
37 In our study, the adjusted ED-LOS was 2 hours shorter in discharged patients who  
38  
39 received their medication in  $\leq 90$  minutes than in those treated in  $> 90$  minutes. The rapid  
40  
41 administration of analgesia, associated with shorter ED-LOS, could have a significant  
42  
43 impact on ED overcrowding. For example, our center received an average of 5,000  
44  
45 patients per year with severe pain on an ED bed. If we extrapolate the proportion of  
46  
47 patient who received analgesia  $>90$  minutes after arrival and the time saved if received in  
48  
49 less than 90 minutes from our study to this population, a bed could be available during 16  
50  
51 hours every day. Such economy of beds would contribute to better throughput of patients  
52  
53  
54  
55  
56  
57  
58  
59  
60

1  
2  
3 and render our EDs more efficient, as espoused by Asplin et al. with their conceptual  
4  
5 model of overcrowding in 2003.<sup>2</sup>  
6  
7

8 A recent consensus of the Canadian Association of Emergency Physicians has  
9  
10 ranked “ED-LOS” and “Time to first dose of analgesic” in the top 12 priority indicators  
11  
12 of quality care.<sup>45</sup> In the USA, the Joint Commission on Accreditation of Healthcare  
13  
14 Organizations mentions “early intervention” as the first goal in the treatment of acute  
15  
16 pain.<sup>37</sup> Similarly, the Australian National Institute of Clinical Studies ranked “reduced  
17  
18 time to analgesia” as the top priority and is currently working on improving their  
19  
20 numbers.<sup>42</sup>  
21  
22  
23

24 New solutions are being proposed to improve the initial approach to pain  
25  
26 management. For example, the simple act of making pain scoring mandatory at triage has  
27  
28 been shown to reduce time to analgesia by 45 minutes.<sup>40</sup> Extension of this practice could  
29  
30 also integrate pain treatment as early as triage to limit further delays. Such measures have  
31  
32 been introduced in Australia where nurse-initiated pain protocols are currently being  
33  
34 evaluated. A pediatric ED study has shown 50% reduction of time to analgesia with such  
35  
36 a protocol.<sup>39</sup> Early administration of analgesics has been investigated in pre-hospital  
37  
38 settings, and appears to be safe and effective, particularly with the use of intranasal  
39  
40 Fentanyl.<sup>46,47</sup> Even if no study has yet shown a benefit of this practice in LOS, it certainly  
41  
42 has promising advantages, and further investigations should be considered.  
43  
44  
45  
46  
47

48 In summary, we found that shorter time to analgesia administration is associated  
49  
50 with ED-LOS reduction. This observation supports recent interest in analgesia  
51  
52 implementation as early as triage or in pre-hospital settings to improve the throughput  
53  
54 component of the overcrowding phenomenon seen in EDs around the world.  
55  
56  
57  
58  
59  
60

1  
2  
3 **Contributors** CS, RD and JMC conceived the study and obtained research funding. JP  
4  
5 mined and analyzed the data. CS drafted the manuscript, and all authors contributed  
6  
7 substantially to its revision. CS takes responsibility for the paper as a whole. All co-  
8  
9 authors have had the opportunity to review the final manuscript and have provided their  
10  
11 permission to publish the manuscript.  
12  
13

14  
15 **Funding** This study was supported by the Emergency Department Research Fund of  
16  
17 Hôpital du Sacré-Coeur de Montréal.  
18  
19

20 **Competing interests** None  
21  
22

23 **Data Sharing Statement:** No additional unpublished data is available.  
24  
25

26 **Ethics approval** The study was approved by the institutional review board.  
27  
28

29 **Provenance and peer review** Not commissioned; externally peer reviewed.  
30  
31  
32  
33  
34  
35  
36  
37  
38  
39  
40  
41  
42  
43  
44  
45  
46  
47  
48  
49  
50

## 51 **BIBLIOGRAPHY**

52  
53  
54  
55  
56  
57  
58  
59  
60

1. Bond K, Ospina MB, Blitz S, et al. Frequency, determinants and impact of overcrowding in emergency departments in Canada: a national survey. *Healthc Q* 2007;10:32-40.
2. Asplin BR, Magid DJ, Rhodes KV, et al. A conceptual model of emergency department crowding. *Ann Emerg Med* 2003;42:173-80.
3. Health Technology Assessment – Strategies to reduce emergency department overcrowding, Alberta Heritage Foundation for Medical Research, 2006.
4. Henneman PL, Nathanson BH, Li H, et al. Emergency department patients who stay more than 6 hours contribute to crowding. *J Emerg Med* 2010;39:105-12.
5. Taylor C. Patient satisfaction in emergency medicine. *Emerg Med J* 2004;21:528-32.
6. Bernstein SL, Aronsky D, Duseja R, et al. The effect of emergency department crowding on clinically oriented outcomes. *Acad Emerg Med* 2009;16:1-10.
7. Richardson DB. The access-block effect: relationship between delay to reaching an inpatient bed and inpatient length of stay. *Med J Aust* 2002;177:492-5.
8. Richardson DB. Increase in patient mortality at 10 days associated with emergency department overcrowding. *Med J Aust* 2006;184:213-6.
9. Sprivulis PC, Da Silva JA, Jacobs IG, et al. The association between hospital overcrowding and mortality among patients admitted via Western Australian emergency departments. *Med J Aust* 2006;184:208-12.
10. Mowery NT, Dougherty SD, Hildreth AN, et al. Emergency department length of stay is an independent predictor of hospital mortality in trauma activation patients. *J Trauma* 2011;70:1317-25.

- 1  
2  
3 11. Miró O, Antonio MT, Jiménez S, et al. Decreased health care quality associated  
4 with emergency department overcrowding. *Eur J Emerg Med* 1999;6:105-7.  
5  
6
- 7  
8 12. Trzeciak S, Rivers EP. Emergency department overcrowding in the United  
9 States: an emerging threat to patient safety and public health. *Emerg Med J*  
10 2003;20:402-5.  
11  
12
- 13 13. Joint Commission on Accreditation Healthcare Organizations, Sentinel Event  
14 Alert - Delays in treatment. Issue 26, June 2002  
15  
16
- 17 14. Hwang U, Morrison R, Harris B, et al. The association of ED crowding factors  
18 with quality of pain management. *Acad Emerg Med* 2007;14:S54.  
19  
20
- 21 15. Hwang U, Richardson LD, Sonuyi TO, et al. The effect of emergency department  
22 crowding on the management of pain in older adults with hip fracture. *J Am*  
23 *Geriatr Soc* 2006;54:270-5.  
24  
25
- 26 16. Pines JM, Hollander JE. Emergency department crowding is associated with poor  
27 care for patients with severe pain. *An Emerg Med* 2008;51:1-5.  
28  
29
- 30 17. Sinatra R. Causes and consequences of inadequate management of acute pain.  
31 *Pain Med* 2010;11:1859-71.  
32  
33
- 34 18. Selbst SM. Analgesic use in the emergency department. *Ann Emerg Med*  
35 1990;19:1010-13.  
36  
37
- 38 19. Todd KH, Ducharme J, Choiniere M, et al. Pain in the emergency department:  
39 results of the pain and emergency medicine initiative (PEMI) multicenter study. *J*  
40 *Pain* 2007;8:460-6.  
41  
42  
43  
44  
45  
46  
47  
48  
49  
50  
51  
52  
53  
54  
55  
56  
57  
58  
59  
60

- 1  
2  
3  
4  
5  
6  
7  
8  
9  
10  
11  
12  
13  
14  
15  
16  
17  
18  
19  
20  
21  
22  
23  
24  
25  
26  
27  
28  
29  
30  
31  
32  
33  
34  
35  
36  
37  
38  
39  
40  
41  
42  
43  
44  
45  
46  
47  
48  
49  
50  
51  
52  
53  
54  
55  
56  
57  
58  
59  
60
20. Todd KH, Sloan EP, Chen C, et al. Survey of pain etiology, management practices and patient satisfaction in two urban emergency departments. *CJEM* 2002;4:252-6.
  21. Silka PA. Pain scores improve analgesic administration patterns for trauma patients in the emergency department. *Acad Emerg Med* 2004;11:264-70.
  22. Stalnikowicz R, Mahamid R, Kaspi S, et al. Undertreatment of acute pain in the emergency department: a challenge. *Int J Qual Health Care* 2005;17:173-6.
  23. Chen EH, Shofer FS, Dean AJ, et al. Gender disparity in analgesic treatment of emergency department patients with acute abdominal pain. *Acad Emerg Med* 2008;15:414-8.
  24. Singer AJ, Garra G, Chohan JK, et al. Triage pain scores and the desire for and use of analgesics. *Ann Emerg Med* 2008;52:689-95.
  25. Yakuna M, Soffer D, Halpern P, et al. An interventional study to improve the quality of analgesia in the emergency department. *CJEM* 2008;10:435-9.
  26. Pines JM, Shofer FS, Isserman JA, et al. The effect of emergency department crowding on analgesia in patients with back pain in two hospitals. *Acad Emerg Med* 2010;17:276-83.
  27. Grant PS. Analgesia delivery in the ED. *Am J Emerg Med* 2006;24:806-9.
  28. Dunwoody CJ, Krenzischek DA, Pasero C, et al. Assessment, physiological monitoring, and consequences of inadequately treated acute pain. *Pain Manag Nurs* 2008;9:11-21.

- 1  
2  
3  
4  
5  
6  
7  
8  
9  
10  
11  
12  
13  
14  
15  
16  
17  
18  
19  
20  
21  
22  
23  
24  
25  
26  
27  
28  
29  
30  
31  
32  
33  
34  
35  
36  
37  
38  
39  
40  
41  
42  
43  
44  
45  
46  
47  
48  
49  
50  
51  
52  
53  
54  
55  
56  
57  
58  
59  
60
29. Morrison RS, Magaziner J, Gilbert M, et al., Relationship between pain and opioid analgesics on the development of delirium following hip fracture. *J Gerontol A Biol Sci Med Sci* 2003;58:76-81.
30. Gonzalez ER, Bahal N, Hansen LA, et al. Intermittent injection vs patient-controlled analgesia for sickle cell crisis pain. Comparison in patients in the emergency department. *Arch Intern Med* 1991;151:1373-78.
31. Gardner RL, Sarkar U, Maselli JH, et al. Factors associated with longer ED lengths of stay. *Am J Emerg Med* 2007;25:643-50.
32. Aubrun F, Langeron O, Quesnel C, et al. Relationships between measurement of pain using visual analog score and morphine requirements during postoperative intravenous morphine titration. *Anesthesiology* 2003;98:1415-21.
33. Macintyre PE, Scott DA, Schug SA, et al. Acute Pain Management: Scientific Evidence, 3<sup>rd</sup> edition. Australian and New Zealand College of Anaesthetists. 2010; p. 491.
34. Smith S, Radcliffe J. Guidelines for the management of pain in adults. Clinical Guidelines 2010.
35. Moore A, McQuay H, Gavaghan D, et al. Deriving dichotomous outcome measures from continuous data in randomised controlled trials of analgesics. *Pain* 1996;66:229-37.
36. Moore A, McQuay H, Gavaghan D, et al. Deriving dichotomous outcome measures from continuous data in randomised controlled trials of analgesics: verification from independent data. *Pain* 1997;69:127-30.

- 1  
2  
3  
4  
5  
6  
7  
8  
9  
10  
11  
12  
13  
14  
15  
16  
17  
18  
19  
20  
21  
22  
23  
24  
25  
26  
27  
28  
29  
30  
31  
32  
33  
34  
35  
36  
37  
38  
39  
40  
41  
42  
43  
44  
45  
46  
47  
48  
49  
50  
51  
52  
53  
54  
55  
56  
57  
58  
59  
60
37. Joint Commission on Accreditation Healthcare Organizations, Pain: current understanding of assessment, management, and treatments. 2001; p. 92.
  38. Carns P. Healthcare Guideline: Assessment and Management of Acute Pain, 6<sup>th</sup> edition. Institute for Clinical Systems Improvement. 2008; p. 58.
  39. Boyd RJ. The efficacy of structured assessment and analgesia provision in the paediatric emergency department. *Emerg Med J* 2005;22:30-2.
  40. Vazirani J, Knott JC. Mandatory pain scoring at triage reduces time to analgesia. *Ann Emerg Med* 2012;59:134-38.
  41. Austin PC, Rothwell DM, Tu JV. A comparison of statistical modeling strategies for analyzing length of stay after CABG surgery. *Health Serv Outcomes Res Methodol* 2002;3:107-33.
  42. National Institute of Clinical Studies - National Emergency Department Collaborative Final Report, Melbourne Australia's, April 2004.
  43. Beveridge RC, Clarke B, Janes L, et al. Implementation guidelines for the Canadian Emergency Department Triage and Acuity Scale. Endorsed by the Canadian Association Of Emergency Physicians (CAEP), the National Emergency Nurses Affiliation of Canada (NENA), and L'association des médecins d'urgence du Québec (AMUQ). 1998; p. 1-32.
  44. Wilson JE, Pendleton JM. Oligoanalgesia in the emergency department. *Am J Emerg Med* 1989;7:620-3.
  45. Schull MJ, Guttman A, Leaver CA, et al. Prioritizing performance measurement for emergency department care: consensus on evidence-based quality of care indicators. *CJEM* 2011;13:300-9.



- 1  
2  
3  
4 46. Bendall JC, Simpson PM, Middleton PM, et al. Effectiveness of prehospital  
5 morphine, Fentanyl, and Methoxyflurane in pediatric patients. *Prehosp Emerg*  
6 *Care* 2011;15:158-65.  
7  
8  
9  
10 47. Krauss WC, Shah S, Shah S, et al. Fentanyl in the out-of-hospital setting:  
11 variables associated with hypotension and hypoxemia. *J Emerg Med*  
12 2011;40:182-7.  
13  
14  
15  
16  
17  
18  
19  
20  
21  
22  
23  
24

#### 25 **FIGURE LEGENDS**

26  
27 **Figure 1:** Median length of stay for subjects with adequate and inadequate pain relief in  
28 discharged and admitted patients.  
29  
30  
31

32  
33  
34 **Figure 2:** Median length of stay for subjects receiving analgesia <90 min versus >=90  
35 min from arrival in discharged and admitted patients.  
36  
37  
38  
39  
40  
41  
42  
43  
44  
45  
46  
47  
48  
49  
50  
51  
52  
53  
54  
55  
56  
57  
58  
59  
60

**Impact of adequate pain relief on emergency department length of stay.**

**Corresponding author:** Raoul Daoust  
5400 boul. Gouin Ouest,  
Montréal, Québec, Canada,  
H4J 1C5.  
T: 514-338-2222#3318  
Fax : 514-338-3513  
[raoul.daoust@videotron.ca](mailto:raoul.daoust@videotron.ca)

Catalina Sokoloff, MD,<sup>a,b</sup>, Raoul Daoust, MD, MSc<sup>a,b</sup>, Jean Paquet, PhD<sup>a,c</sup>, Jean-Marc Chauny, MD, MSc<sup>a,b</sup>,

<sup>a</sup>Department of Emergency Medicine, Research Centre, Hôpital du Sacré-Cœur de Montréal, Montréal, Québec, Canada

<sup>b</sup>Faculty of Medicine, Université de Montréal, Montréal, Québec, Canada

<sup>c</sup>Centre for Advanced Research in Sleep Medicine and Department of Surgery, Hôpital du Sacré-Coeur de Montréal, Montreal, Quebec, Canada

**Keywords :** Analgesia, Length of Stay, Emergency department, Pain relief

**Word count (excluding abstract):** 2 353

**ABSTRACT**

1  
2  
3 **Objectives:** Evaluate the influence of adequate analgesia and time to analgesic treatment  
4 on emergency department (ED) length of stay (LOS).  
5  
6

7  
8 **Setting and Design:** Post-hoc analysis of real time archived data.  
9

10 **Participants:** We included all consecutive ED patients  $\geq 18$  years with pain intensity  $>6$   
11 (verbal numerical scale from 0 to 10), assigned to an ED bed, and whose pain was re-  
12 evaluated less than 1 hour after receiving analgesic treatment.  
13  
14

15  
16  
17 **Outcome measures:** The main outcome was ED-LOS in patients who had adequate pain  
18 relief (AR =  $\downarrow 50\%$  pain intensity) compared to those who did not have such relief (NR).  
19

20  
21 **Results:** A total of 2,033 patients (mean age 49.5 years; 51% men) met our inclusion  
22 criteria; 58.3% were discharged, and 41.7% were admitted. Among patients discharged  
23 or admitted, there was no significant difference in ED-LOS between those with AR  
24 (median [25th-75th percentile]: 9.6 hours [6.3-14.8] and 18.2 hours [11.6-25.7],  
25 respectively) and NR (median [25th-75th percentile]: 9.6 hours [6.6-16.0] and 17.4 hours  
26 [11.3-26.5], respectively). After controlling for confounding factors, rapid time to  
27 analgesia (and not adequate pain relief) was associated with shorter ED-LOS of both  
28 discharged and admitted patients ( $p < 0.001$  and  $p < 0.05$  respectively). When adjusting  
29 for confounding variables, ED-LOS is shortened by 2 hours when delay to receive  
30 analgesic is  $<90$  min compared to  $>90$  min for discharged and by 2.3 hours for admitted  
31 patients.  
32  
33  
34  
35  
36  
37  
38  
39  
40  
41  
42  
43  
44  
45  
46  
47

48 **Conclusions:** In our study, adequate pain relief was not linked with short ED-LOS.  
49

50 However, rapid administration of analgesia was associated with short ED-LOS.  
51  
52  
53  
54

## 55 ARTICLE SUMMARY

56  
57  
58  
59  
60

### Strengths and limitations of this study

-This is a rare study that examines the relationship between pain relief and length of stay controlling for multiple confounding variables in a large cohort of emergency department patients.

-The main limitation of our study is its post hoc design and pre-formed database from a single-centre study in an academic hospital.

### INTRODUCTION

Emergency department (ED) overcrowding has been a concern for many years, and Canada is no exception, with nearly 60% of EDs reporting that problem in 2007.<sup>1</sup> The phenomenon of “boarding” is one of the principal factors identified as its cause.<sup>2,3</sup> “Boarding” (or “access block”) refers to situations where bedridden emergency patients wait for the allocation of a bed on the ward for an unreasonably long time period (prolong ED length of stay) with consequent patient overflow in EDs. However, a recent retrospective study revealed that among patients waiting more than 6 hours in the ED, 50% were finally admitted while the other 50% were discharged,<sup>4</sup> indicating that non-boarding patients length of stay (LOS) also contribute to overcrowding. It has been shown to be a strong predictor of low satisfaction among patients<sup>5</sup> and healthcare workers.<sup>1</sup> It is also associated with long hospital LOS,<sup>6,7</sup> and high short- and medium-term mortality rates.<sup>8-10</sup> Furthermore, overcrowding is linked with reduced timeliness and quality of interventions and treatments,<sup>11-13</sup> including delayed analgesic administration,<sup>14,15</sup> particularly when pain is severe,<sup>16</sup> all of which contribute to the snowball effect of cumulating waits.

Pain represents more than 40% of consultations in EDs.<sup>17</sup> In large studies of patients with moderate to severe pain, only 21 to 68%<sup>18-27</sup> received analgesics, and 50 to

1  
2  
3 74% still had moderate to severe pain at discharge.<sup>17</sup> Severe, persistent pain may also  
4  
5 lead to unwanted physiological responses, namely, increased adrenergic tone, augmented  
6  
7 oxygen consumption, predisposition to hypercoagulability, decreased immune function,  
8  
9 and heightened risk of delirium.<sup>28,29</sup> Moreover, adequate and timely treatment of acute  
10  
11 pain could reduce the risk of chronic pain.<sup>17</sup> The relationship between pain management  
12  
13 and LOS has not been studied has a primary outcome. However, a study of intermittent  
14  
15 injection vs patient-controlled analgesia (PCA) for sickle cell crisis pain in the ED,  
16  
17 established that PCA was associated with a significant reduction in length of ED stay,  
18  
19 although there was no difference in initial or final pain intensity score<sup>30</sup>.  
20  
21  
22  
23

24  
25 Recent studies have attempted to identify the factors contributing to prolonged  
26  
27 ED-LOS. Many of them have already been recognized, namely, number of laboratory  
28  
29 examinations required, having to undergo X-ray or scan, the need for more than 3  
30  
31 medications, and number of consultants.<sup>10,31</sup> To the best of our knowledge, the adequacy  
32  
33 and effectiveness of pain management have never been investigated in this regard. We  
34  
35 sought to evaluate which component of initial pain management was associated with ED-  
36  
37 LOS reduction. We hypothesized that ED-LOS would be lessened in patients with  
38  
39 significant pain relief.  
40  
41  
42  
43  
44

## 45 46 **MATERIALS AND METHODS**

### 47 48 **Study design**

49  
50 We conducted *post hoc* analysis of real time archived data on all consecutive  
51  
52 patients presenting with severe pain at our ED between March 2008 and February 2011.  
53  
54 The aim of our study was to assess if pain relief was associated with ED-LOS reduction.  
55  
56  
57  
58  
59  
60

1  
2  
3 As a secondary objective, we evaluated if time to receiving analgesic treatment was  
4  
5 linked with lessened ED-LOS.  
6  
7  
8  
9

## 10 **Setting**

11  
12 Hôpital du Sacré-Cœur de Montreal is an urban, adult, level I trauma center with  
13  
14 540 inpatient beds and 60,000 ED visits per year. It sustains 22,000 hospitalizations  
15  
16 annually, of which 51% are admitted through the ED. The study was approved by the  
17  
18 institutional review board.  
19  
20  
21  
22  
23

## 24 **Selection of participants**

25  
26  
27 Patients 18 years or older were included if they were assigned to an ED treatment  
28  
29 bed, had severe pain at triage (defined as >6 on an 11-point verbal numerical scale from 0  
30  
31 to 10),<sup>32-34</sup> received an analgesic, and had their pain intensity re-evaluated in less than 1  
32  
33 hour after such medication.  
34  
35

36  
37 Patients were excluded if they died during their ED stay, were pregnant or had  
38  
39 been transferred from another hospital. We also excluded patients with altered mental  
40  
41 status, intoxicated subjects, and anyone with chest pain necessitating emergent PCI,  
42  
43 because their LOS could be determined by treatments other than pain management.  
44  
45  
46  
47

## 48 **Data collection**

49  
50  
51 Data were extracted from computerized information and nursing records in our  
52  
53 ED (MedUrge™, MediaMed Technologies, Mont-Saint-Hilaire, Québec, Canada). This  
54  
55 system is an integrated and mandatory working tool for all physicians, nursing staff, and  
56  
57  
58  
59  
60

any employee involved in the ED healthcare process. It contains all demographic data, triage information (including vital signs, purpose of consultation, and pain level when relevant) as well as any pertinent data collected in real time by nurses during their re-evaluation rounds, including medication administration, and pain intensity.

### Data processing

The cut-off of >6 on 10 was chosen because it was felt that lower pain intensity is less likely to warrant observation in itself. ED-LOS was measured in hours from the time of arrival at the ED to discharge or admission to a ward. We defined adequate pain relief (AR) as reduction of 50% or more of the initial pain level scored on the numerical scale within 1 hour after receiving the first analgesic. The 50% reduction and the 1-hour threshold are based on previous literature suggesting that they represent a meaningful decline<sup>35,36</sup> and acceptable delay in managing severe pain.<sup>34,37,38</sup> Initial pain was the one reported on the triage form. Time between arrival and analgesic administration was dichotomized into  $\leq 90$  minutes versus  $> 90$  minutes and also analyzed by three category (<1 hour; between 1 and 2 hour; >2 hour). We selected a 90-minute threshold because it is the median time to analgesia reported in many EDs with a pain scale integrated in their triage assessment.<sup>19,39,40</sup>

Our primary outcome was ED-LOS of patients with and without adequate pain relief. Our secondary outcome was ED-LOS of patients who received their medication in  $\leq 90$  minutes compared to those who received it after a longer time period.

### Data analysis

1  
2  
3 Median LOS (25th-75th percentile) between groups of patients was compared by  
4  
5 the Mann-Whitney U test and relationship among LOS and continuous predictors by  
6  
7 Spearman rank-order correlations. All LOS are presented in hours and separately for  
8  
9 patients with intravenous versus patients with other than intravenous route of analgesia  
10  
11 administration. To examine the relative influence of adequate pain relief and time to  
12  
13 analgesia on LOS, generalized linear model regressions with Gamma distribution and a  
14  
15 log link function were undertaken for patients discharged from the ED and those admitted  
16  
17 to a ward, controlling for age, gender, route of analgesia administration (IV vs other),  
18  
19 number of dose of analgesia, type of arrival at ED (ambulance or walk in), triage priority  
20  
21 (high vs low), crowding defined as number of patients in ED beds at the time of arrival,  
22  
23 time of day of arrival with high or low LOS (calculated from a database of 162 000  
24  
25 patients of 18 years or older assigned to a bed between March 2008 and February 2011  
26  
27 from the same ED and selecting hours of arrival with high LOS and hours of arrival with  
28  
29 low LOS), time between arrival and physician's first assessment, number of  
30  
31 examinations, number of specialty consultations, baseline pain intensity score, trauma  
32  
33 versus non-trauma, abdominal pain versus other, need for oxygen and for isolation.  
34  
35 Generalized linear model was chosen because LOS is largely skewed and tends to  
36  
37 produce less prediction errors than traditional linear regression<sup>41</sup>. Mean LOS difference  
38  
39 and Wald 95% CI adjusted at mean covariates were produced from estimated marginal  
40  
41 means. The Canadian healthcare system being public and free, the presence or absence of  
42  
43 insurance was not analyzed. Alpha level was set at 0.05 for all statistical tests. All data  
44  
45 were analyzed with SPSS version 20 (IBM, Somers, NY).  
46  
47  
48  
49  
50  
51  
52  
53  
54  
55  
56  
57  
58  
59  
60



## RESULTS

A total of 2,033 patients met our inclusion and exclusion criteria. Of these patients, about half (51%) were male, more than two third arrived at ED alone, 1,186 (58.3%) were finally discharged and 847 were admitted (Table 1).

Among patients who were discharged from the ED, 45.7% had AR compared to 40.3% of admitted patients. There was no significant difference in ED-LOS between patients with AR compared to those without adequate relief (NR) ( $p=0.41$  for discharged patients and  $p=0.87$  for admitted patients) (Figure 1).

Table 1. Patient characteristics of the whole sample

| Characteristics                     | Total (N=2,033) |
|-------------------------------------|-----------------|
| Mean age ( $\pm$ SD)                | 49.5 (17.0)     |
| % male                              | 51.0            |
| % Triage priority                   |                 |
| -high (1-2)                         | 45.3            |
| -low (3-4-5)                        | 54.7            |
| % Arrival                           |                 |
| -ambulance                          | 29.2            |
| -walk in                            | 70.8            |
| % -admitted                         | 41.7            |
| -discharged                         | 58.3            |
| % -treated with opiates only        | 66.7            |
| -treated with non-opiates only      | 11.1            |
| -treated with combination           | 22.2            |
| % Route of analgesia administration |                 |
| -IV                                 | 62.0            |
| -other                              | 38.0            |
| % with trauma injury                | 7.6             |
| % with abdominal pain               | 39.5            |
| % with blood test                   | 6.4             |

|                                                                                           |                 |
|-------------------------------------------------------------------------------------------|-----------------|
| % with heart-rate monitoring                                                              | 11.7            |
| % with oxygen support                                                                     | 9.5             |
| % in isolation                                                                            | 4.5             |
| Mean ( $\pm$ SD) baseline pain intensity score                                            | 8.8 (1.1)       |
| Mean ( $\pm$ SD) final pain intensity score                                               | 5.1 (3.0)       |
| Median LOS in hours (25th-75th percentile)                                                | 12.3 (7.8-20.3) |
| Median time between arrival at ED and analgesic treatment in hours (25th-75th percentile) | 1.8 (1.1-3.2)   |
| Median time to patient care by physician in hours (25th-75th percentile)                  | 0.72 (0.42-1.4) |

LOS: length of stay

Among patients who were discharged from the ED, 533 (45%) received analgesia  $\leq$ 90 minutes, with ED-LOS reduction of 2.3 hours ( $p < 0.001$ ) compared to those with  $>90$  minutes. The same analysis was applied to patients being admitted: only 265 (31%) received their medication in that interval, and their median ED-LOS reduction was 3.9 hours ( $p < 0.001$ ) (Figure 2). Median ED-LOS for three different times to receive analgesia is displayed in table 2.

Table 2. Median length of stay (25th-75th percentiles) for three different times to receive analgesia controlled for route of analgesia administration for discharged and admitted patients.

| Confounding variables                | IV LOS in hour<br>Median (25th-75th<br>percentile) | Other than IV LOS<br>in hour<br>Median (25th-75th<br>percentile) |
|--------------------------------------|----------------------------------------------------|------------------------------------------------------------------|
| Discharged patients:                 | (N=698)                                            | (N=481)                                                          |
| Time to receive analgesia: $<1$ hour | 8.6 (6.0-11.8)                                     | 6.6 (4.4-9.5)                                                    |
| -from 1 to 2 hour                    | 10.5 (6.9-15.9)                                    | 8.2 (5.4-12.2)                                                   |

|                                     |          |                  |                  |
|-------------------------------------|----------|------------------|------------------|
|                                     | ->2 hour | 12.9 (8.9-18.0)  | 10.1 (6.3-19.2)  |
| <hr/>                               |          |                  |                  |
| Admitted patients:                  |          | (N=556)          | (N=289)          |
| Time to receive analgesia: -<1 hour |          | 16.4 (10.8-23.8) | 17.2 (10.7-24.8) |
| -from 1 to 2 hour                   |          | 14.9 (10.4-22.6) | 18.1 (10.0-26.4) |
| ->2 hour                            |          | 18.7 (11.6-27.4) | 19.6 (12.9-28.7) |

LOS: length of stay; IV: intravenous route of analgesia administration; without IV: other than intravenous route of analgesia administration

Table 3 and 4 show the bivariate relations between LOS and all confounding variables controlled for route of analgesia administration for discharged and admitted patients respectively. For discharged patients with IV route of analgesia administration, only type of arrival, crowding and baseline pain intensity score were not related to LOS while for other than IV route of analgesia administration, type of arrival, triage priority, oxygen support, time of day LOS, crowding and baseline pain intensity score were not associated with LOS. For admitted patients with IV route of analgesia administration, triage priority, type of arrival, blood testing, time of day LOS, crowding, number of dose and baseline pain intensity score were not related to LOS while for other than IV route of analgesia administration, gender, triage priority, type of arrival, trauma injury, abdominal pain, time of day LOS and physician taking charge delay were not associated with LOS.

Table 3. Relationship between length of stay and all confounding variables for discharged patients.

| Confounding variables    | IV LOS in hour<br>(N=702)        | Other than IV LOS in<br>hour (N=484) |
|--------------------------|----------------------------------|--------------------------------------|
| Categorical confounders: | Median (25th-75th<br>percentile) | Median (25th-75th<br>percentile)     |

|                                                |                                 |                                 |
|------------------------------------------------|---------------------------------|---------------------------------|
| Gender: -male                                  | 9.5 (6.7-15.0)**                | 8.0 (5.5-12.3)**                |
| -female                                        | 11.1 (7.9-16.9)                 | 9.8 (6.1-18.4)                  |
| Triage priority: -high (1-2)                   | 9.7 (6.7-15.3)**                | 8.8 (5.8-13.1)                  |
| -low (3-4-5)                                   | 10.8 (7.9-17.0)                 | 8.8 (5.8-15.0)                  |
| Arrival: -ambulance                            | 10.8 (7.3-16.3)                 | 8.8 (5.7-15.5)                  |
| -walk in                                       | 10.0 (7.2-15.7)                 | 8.7 (5.8-13.5)                  |
| Trauma injury: -Yes                            | 7.1 (4.1-13.0)**                | 6.4 (4.6-12.7)**                |
| -No                                            | 10.4 (7.3-15.9)                 | 9.0 (5.9-14.8)                  |
| Abdominal pain: -Yes                           | 11.3 (7.8-17.5)**               | 10.5 (5.7-13.4)**               |
| -No                                            | 9.6 (6.9-14.6)                  | 8.3 (6.9-14.6)                  |
| Blood test: -Yes                               | 16.4 (10.2-23.6)**              | 18.5 (11.6-25.0)**              |
| -No                                            | 10.0 (7.1-15.5)                 | 8.6 (5.8-13.8)                  |
| Heart-rate monitoring: -Yes                    | 14.6 (10.6-24.4)**              | 12.7 (9.2-27.8)**               |
| -No                                            | 9.8 (6.9-15.2)                  | 8.2 (5.7-13.4)                  |
| Oxygen support: -Yes                           | 13.5 (8.7-23.0)**               | 10.4 (8.7-23.0)                 |
| -No                                            | 10.0 (7.1-15.4)                 | 8.6 (5.7-14.0)                  |
| Isolation: -Yes                                | 22.7 (11.3-36.7)**              | 22.6 (11.7-44.3)**              |
| -No                                            | 10.0 (7.1-15.7)                 | 8.6 (5.8-13.5)                  |
| Time of day of arrival with: -low LOS          | 9.0 (7.1-10.7)**                | 8.6 (6.1-10.4)                  |
| -high LOS                                      | 11.1 (7.2-16.9)                 | 8.8 (5.7-15.2)                  |
| Continuous confounders:                        | Spearman rank-order correlation | Spearman rank-order correlation |
| Age:                                           | 0.18**                          | 0.09*                           |
| Crowding:                                      | 0.06                            | -0.06                           |
| Physician taking charge delay:                 | 0.21**                          | 0.19**                          |
| Number of exams (range 0-15):                  | 0.33**                          | 0.29**                          |
| Number of specialist consultation (range 0-8): | 0.41**                          | 0.44**                          |
| Number of dose (range 1-7):                    | -0.13**                         | -0.10*                          |
| Baseline pain intensity score:                 | -0.06                           | -0.01                           |

LOS : length of stay; IV: intravenous route of analgesia administration; other than IV: other than intravenous route of analgesia administration; \*p<0.05; \*\*p<0.01

Table 4. Relationship between length of stay and all confounding variables for **admitted** patients.

| Confounding variables                          | IV LOS in hour<br>(N=558)                   | Other than IV LOS in<br>hour (N=289)       |
|------------------------------------------------|---------------------------------------------|--------------------------------------------|
| <b>Categorical confounders:</b>                | <b>Median (25th-75th<br/>percentile)</b>    | <b>Median (25th-75th<br/>percentile)</b>   |
| Gender: -male                                  | 15.4 (10.5-23.6)*                           | 18.9 (11.4-27.5)                           |
| -female                                        | 18.0 (11.7-25.4)                            | 19.5 (12.7-27.9)                           |
| Triage priority: -high (1-2)                   | 16.4 (10.4-24.5)                            | 18.4 (11.1-25.8)                           |
| -low (3-4-5)                                   | 17.2 (11.7-25.0)                            | 19.5 (12.9-27.6)                           |
| Arrival: -ambulance                            | 17.0 (10.7-25.3)                            | 20.7 (13.5-28.4)                           |
| -walk in                                       | 16.6 (11.4-24.5)                            | 18.4 (12.0-26.9)                           |
| Trauma injury: -Yes                            | 12.5 (8.7-21.1)*                            | 15.7 (8.2-27.6)                            |
| -No                                            | 17.0 (11.4-24.8)                            | 19.4 (12.6-27.6)                           |
| Abdominal pain: -Yes                           | 16.0 (10.9-23.3)*                           | 19.4 (12.9-26.7)                           |
| -No                                            | 18.0 (11.5-27.6)                            | 19.3 (11.6-28.2)                           |
| Blood test: -Yes                               | 19.8 (11.8-28.5)                            | 27.9 (16.4-35.8)**                         |
| -No                                            | 16.4 (10.9-24.5)                            | 18.8 (11.6-26.8)                           |
| Heart-rate monitoring: -Yes                    | 23.1 (16.2-38.6)**                          | 30.0 (25.3-45.2)**                         |
| -No                                            | 15.6 (10.7-23.1)                            | 17.8 (11.3-25.7)                           |
| Oxygen support: -Yes                           | 20.9 (12.3-34.4)**                          | 26.8 (15.1-45.0)**                         |
| -No                                            | 15.9 (10.8-24.1)                            | 18.7 (11.7-26.7)                           |
| Isolation: -Yes                                | 30.1 (21.8-54.3)**                          | 35.5 (22.6-57.8)**                         |
| -No                                            | 15.9 (10.8-23.8)                            | 18.5 (11.6-26.7)                           |
| Time of day of arrival with: -low LOS          | 15.7 (9.7-29.1)                             | 16.2 (10.6-24.2)                           |
| -high LOS                                      | 17.0 (11.4-24.5)                            | 19.8 (12.7-27.8)                           |
| <b>Continuous confounders:</b>                 | <b>Spearman rank-<br/>order correlation</b> | <b>Spearman rank-order<br/>correlation</b> |
| Age:                                           | 0.15**                                      | 0.22**                                     |
| Crowding:                                      | 0.03                                        | 0.17**                                     |
| Physician taking charge delay:                 | 0.16**                                      | 0.06                                       |
| Number of exams (range 0-15):                  | 0.34**                                      | 0.36**                                     |
| Number of specialist consultation (range 0-8): | 0.31**                                      | 0.37**                                     |
| Number of dose (range 1-7):                    | -0.03                                       | -0.15**                                    |
| Baseline pain intensity score:                 | 0.003                                       | -0.12*                                     |

LOS : length of stay; IV: intravenous route of analgesia administration; other than IV: other than intravenous route of analgesia administration; \*p<0.05; \*\*p<0.01

1  
2  
3  
4  
5  
6  
7  
8  
9  
10  
11  
12  
13  
14  
15  
16  
17  
18  
19  
20  
21  
22  
23  
24  
25  
26  
27  
28  
29  
30  
31  
32  
33  
34  
35  
36  
37  
38  
39  
40  
41  
42  
43  
44  
45  
46  
47  
48  
49  
50  
51  
52  
53  
54  
55  
56  
57  
58  
59  
60

Multivariate analysis showed that when controlling for confounding variables, a brief time period ( $\leq 90$  minutes) before analgesic administration (and not adequate pain relief) is associated with shortened ED-LOS for both discharged and admitted patients ( $\beta=0.16$ ; 95% confidence interval (95% CI): 0.10-0.22;  $p<0.001$  and  $\beta=0.09$ ; 95% CI: 0.006-0.18;  $p<0.05$ , respectively). When adjusting for confounding variables, ED-LOS is shortened by 2 hours (95%CI: 1.1-2.8;  $p<0.001$ ) when time to receive analgesic is  $<90$  min compared to  $>90$  min for discharged and by 2.3 hours (95%CI: 0.17-4.4;  $p<0.05$ ) for admitted patients.

## LIMITATIONS

The main limitation of our study is its post hoc design and pre-formed database. Potential confounding variables, such as ethnicity and linguistic barrier, which are not recorded in demographic charts of our computerized system, could not be taken into consideration. Time from pain onset, component of chronic pain and pharmacological or non-pharmacological analgesia prior to arrival at the ED were also unknown. Case complexity assessment was difficult, although we controlled for number of examinations, number of consultants, need for oxygen and for isolation, which are markers of complexity. Likewise, we do not know if some patients did not receive an analgesic nor had suboptimal pain management because of refusal. However, it is doubtful that any of these confounding variables would cause significant differential bias. Finally, our single-center study in an academic hospital might limit the generalization of our results.

## DISCUSSION

1  
2  
3  
4 As far as we know, this is the first investigation to evaluate the impact of pain  
5 relief on ED-LOS, and our results demonstrated that rapid administration of analgesia,  
6 and not adequate pain relief, is associated with shorter ED-LOS. It has been reported that  
7 patients expect to receive pain medication 25 to 30 minutes after their arrival,<sup>42</sup> which  
8 coincides with the guidelines of our triage system (Canadian Emergency Department  
9 Triage and Acuity Scale).<sup>43</sup> Unfortunately, this goal is far from being achieved in many  
10 EDs, not only in Canada, but also around the world.<sup>19,27,42</sup> This is a persistent problem  
11 that dates back to the late 1980s when Wilson and Pendleton first defined the term  
12 “oligoanalgesia”.<sup>44</sup>

13  
14  
15  
16  
17  
18  
19  
20  
21  
22  
23  
24  
25 More recently, the Pain and Emergency Medicine Initiative study demonstrated  
26 that patient satisfaction was associated more with the way ED physicians responded to  
27 their complaints of pain than to the actual result of pain treatment.<sup>19</sup> Which components  
28 of this response to pain were significant was not specified, but a possible part of it was  
29 the promptness with which pain was addressed. Patients with severe pain probably  
30 associate receiving pain medication quickly with quality of care and are more inclined to  
31 accept a medical treatment plan, even if they do not get relief. This might explain why  
32 we observed improved ED-LOS with prompt analgesic administration in patients being  
33 discharged or admitted.

34  
35  
36  
37  
38  
39  
40  
41  
42  
43  
44  
45  
46 In our study, the adjusted ED-LOS was 2 hours shorter in discharged patients who  
47 received their medication in  $\leq 90$  minutes than in those treated in  $> 90$  minutes. The rapid  
48 administration of analgesia, associated with shorter ED-LOS, could have a significant  
49 impact on ED overcrowding. For example, our center received an average of 5,000  
50 patients per year with severe pain on an ED bed. If we extrapolate the proportion of  
51  
52  
53  
54  
55  
56  
57  
58  
59  
60

1  
2  
3 patient who received analgesia >90 minutes after arrival and the time saved if received in  
4 less than 90 minutes from our study to this population, a bed could be available during 16  
5 hours every day. Such economy of beds would contribute to better throughput of patients  
6 and render our EDs more efficient, as espoused by Asplin et al. with their conceptual  
7 model of overcrowding in 2003.<sup>2</sup>  
8  
9

10  
11 A recent consensus of the Canadian Association of Emergency Physicians has  
12 ranked “ED-LOS” and “Time to first dose of analgesic” in the top 12 priority indicators  
13 of quality care.<sup>45</sup> In the USA, the Joint Commission on Accreditation of Healthcare  
14 Organizations mentions “early intervention” as the first goal in the treatment of acute  
15 pain.<sup>37</sup> Similarly, the Australian National Institute of Clinical Studies ranked “reduced  
16 time to analgesia” as the top priority and is currently working on improving their  
17 numbers.<sup>42</sup>  
18  
19

20  
21 New solutions are being proposed to improve the initial approach to pain  
22 management. For example, the simple act of making pain scoring mandatory at triage has  
23 been shown to reduce time to analgesia by 45 minutes.<sup>40</sup> Extension of this practice could  
24 also integrate pain treatment as early as triage to limit further delays. Such measures have  
25 been introduced in Australia where nurse-initiated pain protocols are currently being  
26 evaluated. A pediatric ED study has shown 50% reduction of time to analgesia with such  
27 a protocol.<sup>39</sup> Early administration of analgesics has been investigated in pre-hospital  
28 settings, and appears to be safe and effective, particularly with the use of intranasal  
29 Fentanyl.<sup>46,47</sup> Even if no study has yet shown a benefit of this practice in LOS, it certainly  
30 has promising advantages, and further investigations should be considered.  
31  
32  
33  
34  
35  
36  
37  
38  
39  
40  
41  
42  
43  
44  
45  
46  
47  
48  
49  
50  
51  
52  
53  
54  
55  
56  
57  
58  
59  
60



1  
2  
3 In summary, we found that shorter time to analgesia administration is associated  
4 with ED-LOS reduction. This observation supports recent interest in analgesia  
5 implementation as early as triage or in pre-hospital settings to improve the throughput  
6 component of the overcrowding phenomenon seen in EDs around the world.  
7  
8  
9  
10  
11  
12  
13

14  
15 **Contributors** CS, RD and JMC conceived the study and obtained research funding. JP  
16 mined and analyzed the data. CS drafted the manuscript, and all authors contributed  
17 substantially to its revision. CS takes responsibility for the paper as a whole. All co-  
18 authors have had the opportunity to review the final manuscript and have provided their  
19 permission to publish the manuscript.  
20  
21  
22  
23  
24  
25  
26  
27  
28

29 **Funding** This study was supported by the Emergency Department Research Fund of  
30 Hôpital du Sacré-Coeur de Montréal.  
31  
32  
33  
34  
35

36 **Competing interests** None.  
37  
38

39 **Ethics approval** The study was approved by the institutional review board.  
40  
41

42 **Provenance and peer review** Not commissioned; externally peer reviewed.  
43  
44  
45  
46  
47  
48

## 49 **BIBLIOGRAPHY**

- 50  
51 1. Bond K, Ospina MB, Blitz S, et al. Frequency, determinants and impact of  
52 overcrowding in emergency departments in Canada: a national survey. *Healthc Q*  
53 2007;10:32-40.  
54  
55  
56  
57  
58  
59  
60

- 1  
2  
3 2. Asplin BR, Magid DJ, Rhodes KV, et al. A conceptual model of emergency  
4 department crowding. *Ann Emerg Med* 2003;42:173-80.  
5  
6  
7
- 8 3. Health Technology Assessment – Strategies to reduce emergency department  
9 overcrowding, Alberta Heritage Foundation for Medical Research, 2006.  
10  
11
- 12 4. Henneman PL, Nathanson BH, Li H, et al. Emergency department patients who  
13 stay more than 6 hours contribute to crowding. *J Emerg Med* 2010;39:105-12.  
14  
15
- 16 5. Taylor C. Patient satisfaction in emergency medicine. *Emerg Med J* 2004;21:528-  
17 32.  
18  
19
- 20 6. Bernstein SL, Aronsky D, Duseja R, et al. The effect of emergency department  
21 crowding on clinically oriented outcomes. *Acad Emerg Med* 2009;16:1-10.  
22  
23
- 24 7. Richardson DB. The access-block effect: relationship between delay to reaching  
25 an inpatient bed and inpatient length of stay. *Med J Aust* 2002;177:492-5.  
26  
27
- 28 8. Richardson DB. Increase in patient mortality at 10 days associated with  
29 emergency department overcrowding. *Med J Aust* 2006;184:213-6.  
30  
31
- 32 9. Sprivulis PC, Da Silva JA, Jacobs IG, et al. The association between hospital  
33 overcrowding and mortality among patients admitted via Western Australian  
34 emergency departments. *Med J Aust* 2006;184:208-12.  
35  
36
- 37 10. Mowery NT, Dougherty SD, Hildreth AN, et al. Emergency department length of  
38 stay is an independent predictor of hospital mortality in trauma activation patients.  
39  
40  
41  
42  
43  
44  
45  
46  
47  
48  
49  
50  
51  
52  
53  
54  
55  
56  
57  
58  
59  
60
11. Miró O, Antonio MT, Jiménez S, et al. Decreased health care quality associated  
with emergency department overcrowding. *Eur J Emerg Med* 1999;6:105-7.

- 1  
2  
3 12. Trzeciak S, Rivers EP. Emergency department overcrowding in the United  
4 States: an emerging threat to patient safety and public health. *Emerg Med J*  
5 2003;20:402-5.  
6  
7
- 8  
9  
10 13. Joint Commission on Accreditation Healthcare Organizations, Sentinel Event  
11 Alert - Delays in treatment. Issue 26, June 2002  
12
- 13  
14 14. Hwang U, Morrison R, Harris B, et al. The association of ED crowding factors  
15 with quality of pain management. *Acad Emerg Med* 2007;14:S54.  
16  
17
- 18  
19 15. Hwang U, Richardson LD, Sonuyi TO, et al. The effect of emergency department  
20 crowding on the management of pain in older adults with hip fracture. *J Am*  
21 *Geriat Soc* 2006;54:270-5.  
22  
23
- 24  
25 16. Pines JM, Hollander JE. Emergency department crowding is associated with poor  
26 care for patients with severe pain. *An Emerg Med* 2008;51:1-5.  
27  
28
- 29  
30 17. Sinatra R. Causes and consequences of inadequate management of acute pain.  
31 *Pain Med* 2010;11:1859-71.  
32  
33
- 34  
35 18. Selbst SM. Analgesic use in the emergency department. *Ann Emerg Med*  
36 1990;19:1010-13.  
37  
38
- 39  
40 19. Todd KH, Ducharme J, Choiniere M, et al. Pain in the emergency department:  
41 results of the pain and emergency medicine initiative (PEMI) multicenter study. *J*  
42 *Pain* 2007;8:460-6.  
43  
44
- 45  
46 20. Todd KH, Sloan EP, Chen C, et al. Survey of pain etiology, management  
47 practices and patient satisfaction in two urban emergency departments. *CJEM*  
48 2002;4:252-6.  
49  
50  
51  
52  
53  
54  
55  
56  
57  
58  
59  
60

- 1  
2  
3 21. Silka PA. Pain scores improve analgesic administration patterns for trauma  
4 patients in the emergency department. *Acad Emerg Med* 2004;11:264-70.  
5  
6  
7
- 8 22. Stalnikowicz R, Mahamid R, Kaspi S, et al. Undertreatment of acute pain in the  
9 emergency department: a challenge. *Int J Qual Health Care* 2005;17:173-6.  
10  
11
- 12 23. Chen EH, Shofer FS, Dean AJ, et al. Gender disparity in analgesic treatment of  
13 emergency department patients with acute abdominal pain. *Acad Emerg Med*  
14 2008;15:414-8.  
15  
16  
17
- 18 24. Singer AJ, Garra G, Chohan JK, et al. Triage pain scores and the desire for and  
19 use of analgesics. *Ann Emerg Med* 2008;52:689-95.  
20  
21  
22
- 23 25. Yakuna M, Soffer D, Halpern P, et al. An interventional study to improve the  
24 quality of analgesia in the emergency department. *CJEM* 2008;10:435-9.  
25  
26  
27
- 28 26. Pines JM, Shofer FS, Isserman JA, et al. The effect of emergency department  
29 crowding on analgesia in patients with back pain in two hospitals. *Acad Emerg*  
30 *Med* 2010;17:276-83.  
31  
32  
33
- 34 27. Grant PS. Analgesia delivery in the ED. *Am J Emerg Med* 2006;24:806-9.  
35  
36  
37
- 38 28. Dunwoody CJ, Krenzischek DA, Pasero C, et al. Assessment, physiological  
39 monitoring, and consequences of inadequately treated acute pain. *Pain Manag*  
40 *Nurs* 2008;9:11-21.  
41  
42  
43
- 44 29. Morrison RS, Magaziner J, Gilbert M, et al., Relationship between pain and  
45 opioid analgesics on the development of delirium following hip fracture. *J*  
46 *Gerontol A Biol Sci Med Sci* 2003;58:76-81.  
47  
48  
49  
50  
51  
52  
53  
54  
55  
56  
57  
58  
59  
60

- 1  
2  
3  
4  
5  
6  
7  
8  
9  
10  
11  
12  
13  
14  
15  
16  
17  
18  
19  
20  
21  
22  
23  
24  
25  
26  
27  
28  
29  
30  
31  
32  
33  
34  
35  
36  
37  
38  
39  
40  
41  
42  
43  
44  
45  
46  
47  
48  
49  
50  
51  
52  
53  
54  
55  
56  
57  
58  
59  
60
30. Gonzalez ER, Bahal N, Hansen LA, et al. Intermittent injection vs patient-controlled analgesia for sickle cell crisis pain. Comparison in patients in the emergency department. *Arch Intern Med* 1991;151:1373-78.
  31. Gardner RL, Sarkar U, Maselli JH, et al. Factors associated with longer ED lengths of stay. *Am J Emerg Med* 2007;25:643-50.
  32. Aubrun F, Langeron O, Quesnel C, et al. Relationships between measurement of pain using visual analog score and morphine requirements during postoperative intravenous morphine titration. *Anesthesiology* 2003;98:1415-21.
  33. Macintyre PE, Scott DA, Schug SA, et al. Acute Pain Management: Scientific Evidence, 3<sup>rd</sup> edition. Australian and New Zealand College of Anaesthetists. 2010; p. 491.
  34. Smith S, Radcliffe J. Guidelines for the management of pain in adults. Clinical Guidelines 2010.
  35. Moore A, McQuay H, Gavaghan D, et al. Deriving dichotomous outcome measures from continuous data in randomised controlled trials of analgesics. *Pain* 1996;66:229-37.
  36. Moore A, McQuay H, Gavaghan D, et al. Deriving dichotomous outcome measures from continuous data in randomised controlled trials of analgesics: verification from independent data. *Pain* 1997;69:127-30.
  37. Joint Commission on Accreditation Healthcare Organizations, Pain: current understanding of assessment, management, and treatments. 2001; p. 92.
  38. Carns P. Healthcare Guideline: Assessment and Management of Acute Pain, 6<sup>th</sup> edition. Institute for Clinical Systems Improvement. 2008; p. 58.

- 1  
2  
3  
4  
5  
6  
7  
8  
9  
10  
11  
12  
13  
14  
15  
16  
17  
18  
19  
20  
21  
22  
23  
24  
25  
26  
27  
28  
29  
30  
31  
32  
33  
34  
35  
36  
37  
38  
39  
40  
41  
42  
43  
44  
45  
46  
47  
48  
49  
50  
51  
52  
53  
54  
55  
56  
57  
58  
59  
60
39. Boyd RJ. The efficacy of structured assessment and analgesia provision in the paediatric emergency department. *Emerg Med J* 2005;22:30-2.
40. Vazirani J, Knott JC. Mandatory pain scoring at triage reduces time to analgesia. *Ann Emerg Med* 2012;59:134-38.
41. Austin PC, Rothwell DM, Tu JV. A comparison of statistical modeling strategies for analyzing length of stay after CABG surgery. *Health Serv Outcomes Res Methodol* 2002;3:107-33.
42. National Institute of Clinical Studies - National Emergency Department Collaborative Final Report, Melbourne Australia's, April 2004.
43. Beveridge RC, Clarke B, Janes L, et al. Implementation guidelines for the Canadian Emergency Department Triage and Acuity Scale. Endorsed by the Canadian Association Of Emergency Physicians (CAEP), the National Emergency Nurses Affiliation of Canada (NENA), and L'association des médecins d'urgence du Québec (AMUQ). 1998; p. 1-32.
44. Wilson JE, Pendleton JM. Oligoanalgesia in the emergency department. *Am J Emerg Med* 1989;7:620-3.
45. Schull MJ, Guttman A, Leaver CA, et al. Prioritizing performance measurement for emergency department care: consensus on evidence-based quality of care indicators. *CJEM* 2011;13:300-9.
46. Bendall JC, Simpson PM, Middleton PM, et al. Effectiveness of prehospital morphine, Fentanyl, and Methoxyflurane in pediatric patients. *Prehosp Emerg Care* 2011;15:158-65.

- 1  
2  
3 47. Krauss WC, Shah S, Shah S, et al. Fentanyl in the out-of-hospital setting:  
4 variables associated with hypotension and hypoxemia. *J Emerg Med*  
5  
6 2011;40:182-7.  
7  
8  
9  
10  
11  
12  
13  
14  
15  
16  
17

### 18 **FIGURE LEGENDS**

19  
20 **Figure 1:** Median length of stay for subjects with adequate and inadequate pain relief in  
21 discharged and admitted patients.  
22  
23

24  
25  
26  
27 **Figure 2:** Median length of stay for subjects receiving analgesia <90 min versus >=90  
28 min from arrival in discharged and admitted patients.  
29  
30  
31  
32  
33  
34  
35  
36  
37  
38  
39  
40  
41  
42  
43  
44  
45  
46  
47  
48  
49  
50  
51  
52  
53  
54  
55  
56  
57  
58  
59  
60

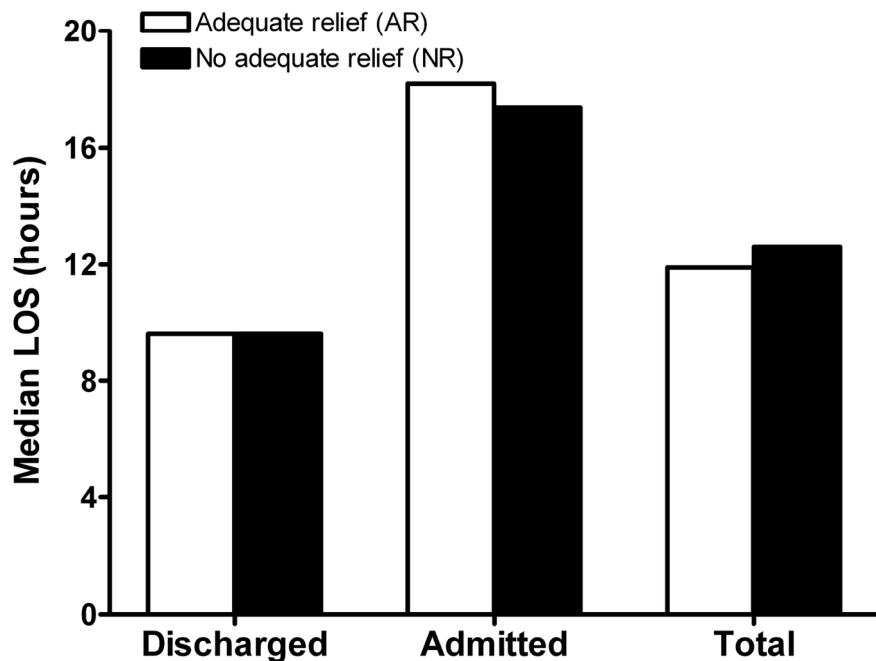

Figure 1: Median length of stay for subjects with adequate and inadequate pain relief in discharged and admitted patients.  
152x121mm (300 x 300 DPI)

1  
2  
3  
4  
5  
6  
7  
8  
9  
10  
11  
12  
13  
14  
15  
16  
17  
18  
19  
20  
21  
22  
23  
24  
25  
26  
27  
28  
29  
30  
31  
32  
33  
34  
35  
36  
37  
38  
39  
40  
41  
42  
43  
44  
45  
46  
47  
48  
49  
50  
51  
52  
53  
54  
55  
56  
57  
58  
59  
60



1  
2  
3  
4  
5  
6  
7  
8  
9  
10  
11  
12  
13  
14  
15  
16  
17  
18  
19  
20  
21  
22  
23  
24  
25  
26  
27  
28  
29  
30  
31  
32  
33  
34  
35  
36  
37  
38  
39  
40  
41  
42  
43  
44  
45  
46  
47  
48  
49  
50  
51  
52  
53  
54  
55  
56  
57  
58  
59  
60

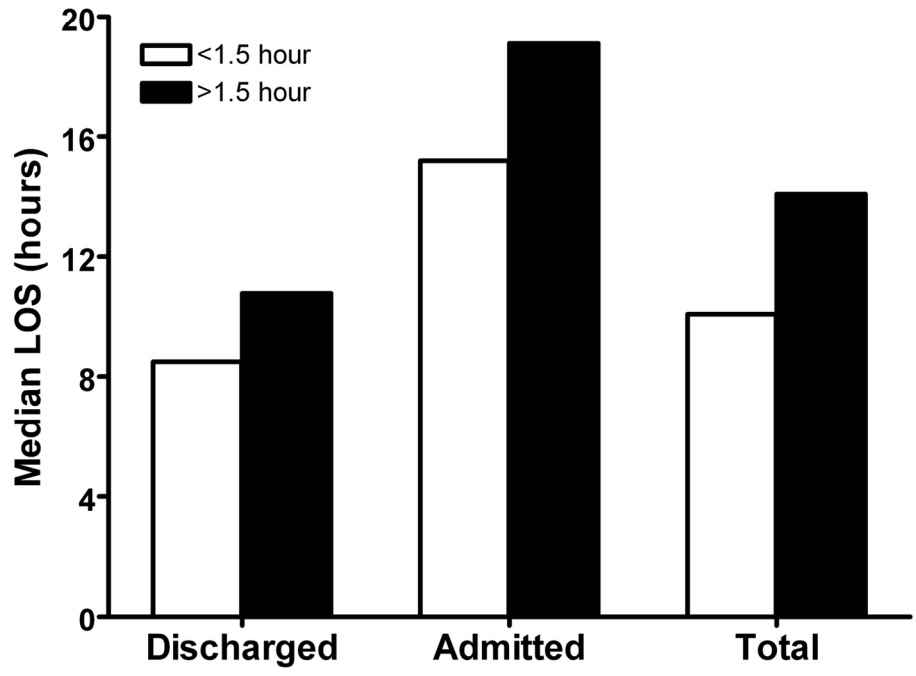

Figure 2: Median length of stay for subjects receiving analgesia <90 min versus >=90 min from arrival in discharged and admitted patients.  
148x118mm (300 x 300 DPI)

## STROBE Statement—checklist of items that should be included in reports of observational studies

|                              | Item No | Recommendation                                                                                                                                                                                                                                                                                                                                                                                                                                                                                                                                                                                                                                                                                               |
|------------------------------|---------|--------------------------------------------------------------------------------------------------------------------------------------------------------------------------------------------------------------------------------------------------------------------------------------------------------------------------------------------------------------------------------------------------------------------------------------------------------------------------------------------------------------------------------------------------------------------------------------------------------------------------------------------------------------------------------------------------------------|
| <b>Title and abstract</b>    | 1       | (a) Indicate the study's design with a commonly used term in the title or the abstract<br><b>Done</b><br>(b) Provide in the abstract an informative and balanced summary of what was done and what was found <b>Done</b>                                                                                                                                                                                                                                                                                                                                                                                                                                                                                     |
| <b>Introduction</b>          |         |                                                                                                                                                                                                                                                                                                                                                                                                                                                                                                                                                                                                                                                                                                              |
| Background/rationale         | 2       | Explain the scientific background and rationale for the investigation being reported<br><b>Done</b>                                                                                                                                                                                                                                                                                                                                                                                                                                                                                                                                                                                                          |
| Objectives                   | 3       | State specific objectives, including any prespecified hypotheses <b>Done</b>                                                                                                                                                                                                                                                                                                                                                                                                                                                                                                                                                                                                                                 |
| <b>Methods</b>               |         |                                                                                                                                                                                                                                                                                                                                                                                                                                                                                                                                                                                                                                                                                                              |
| Study design                 | 4       | Present key elements of study design early in the paper <b>Done</b>                                                                                                                                                                                                                                                                                                                                                                                                                                                                                                                                                                                                                                          |
| Setting                      | 5       | Describe the setting, locations, and relevant dates, including periods of recruitment, exposure, follow-up, and data collection <b>Done</b>                                                                                                                                                                                                                                                                                                                                                                                                                                                                                                                                                                  |
| Participants                 | 6       | (a) <i>Cohort study</i> —Give the eligibility criteria, and the sources and methods of selection of participants. Describe methods of follow-up<br><i>Case-control study</i> —Give the eligibility criteria, and the sources and methods of case ascertainment and control selection. Give the rationale for the choice of cases and controls<br><i>Cross-sectional study</i> —Give the eligibility criteria, and the sources and methods of selection of participants <b>Done</b><br>(b) <i>Cohort study</i> —For matched studies, give matching criteria and number of exposed and unexposed<br><i>Case-control study</i> —For matched studies, give matching criteria and the number of controls per case |
| Variables                    | 7       | Clearly define all outcomes, exposures, predictors, potential confounders, and effect modifiers. Give diagnostic criteria, if applicable <b>Done</b>                                                                                                                                                                                                                                                                                                                                                                                                                                                                                                                                                         |
| Data sources/<br>measurement | 8*      | For each variable of interest, give sources of data and details of methods of assessment (measurement). Describe comparability of assessment methods if there is more than one group <b>Done</b>                                                                                                                                                                                                                                                                                                                                                                                                                                                                                                             |
| Bias                         | 9       | Describe any efforts to address potential sources of bias <b>Done</b>                                                                                                                                                                                                                                                                                                                                                                                                                                                                                                                                                                                                                                        |
| Study size                   | 10      | Explain how the study size was arrived at <b>Not applicable</b>                                                                                                                                                                                                                                                                                                                                                                                                                                                                                                                                                                                                                                              |
| Quantitative variables       | 11      | Explain how quantitative variables were handled in the analyses. If applicable, describe which groupings were chosen and why <b>Done</b>                                                                                                                                                                                                                                                                                                                                                                                                                                                                                                                                                                     |
| Statistical methods          | 12      | (a) Describe all statistical methods, including those used to control for confounding<br><b>Done</b><br>(b) Describe any methods used to examine subgroups and interactions <b>Not applicable</b><br>(c) Explain how missing data were addressed <b>Done</b><br>(d) <i>Cohort study</i> —If applicable, explain how loss to follow-up was addressed<br><i>Case-control study</i> —If applicable, explain how matching of cases and controls was addressed<br><i>Cross-sectional study</i> —If applicable, describe analytical methods taking account of sampling strategy<br>(e) Describe any sensitivity analyses <b>Not applicable</b>                                                                     |

Continued on next page

**Results**

|                  |     |                                                                                                                                                                                                                                                                                                                                                                                                                                       |
|------------------|-----|---------------------------------------------------------------------------------------------------------------------------------------------------------------------------------------------------------------------------------------------------------------------------------------------------------------------------------------------------------------------------------------------------------------------------------------|
| Participants     | 13* | (a) Report numbers of individuals at each stage of study—eg numbers potentially eligible, examined for eligibility, confirmed eligible, included in the study, completing follow-up, and analysed <b>Done</b><br>(b) Give reasons for non-participation at each stage <b>Done</b><br>(c) Consider use of a flow diagram                                                                                                               |
| Descriptive data | 14* | (a) Give characteristics of study participants (eg demographic, clinical, social) and information on exposures and potential confounders <b>Done</b><br>(b) Indicate number of participants with missing data for each variable of interest <b>Done</b><br>(c) <i>Cohort study</i> —Summarise follow-up time (eg, average and total amount)                                                                                           |
| Outcome data     | 15* | <i>Cohort study</i> —Report numbers of outcome events or summary measures over time<br><i>Case-control study</i> —Report numbers in each exposure category, or summary measures of exposure<br><i>Cross-sectional study</i> —Report numbers of outcome events or summary measures <b>Done</b>                                                                                                                                         |
| Main results     | 16  | (a) Give unadjusted estimates and, if applicable, confounder-adjusted estimates and their precision (eg, 95% confidence interval). Make clear which confounders were adjusted for and why they were included <b>Done</b><br>(b) Report category boundaries when continuous variables were categorized <b>Done</b><br>(c) If relevant, consider translating estimates of relative risk into absolute risk for a meaningful time period |
| Other analyses   | 17  | Report other analyses done—eg analyses of subgroups and interactions, and sensitivity analyses                                                                                                                                                                                                                                                                                                                                        |

**Discussion**

|                  |    |                                                                                                                                                                                        |
|------------------|----|----------------------------------------------------------------------------------------------------------------------------------------------------------------------------------------|
| Key results      | 18 | Summarise key results with reference to study objectives <b>Done</b>                                                                                                                   |
| Limitations      | 19 | Discuss limitations of the study, taking into account sources of potential bias or imprecision. Discuss both direction and magnitude of any potential bias <b>Done</b>                 |
| Interpretation   | 20 | Give a cautious overall interpretation of results considering objectives, limitations, multiplicity of analyses, results from similar studies, and other relevant evidence <b>Done</b> |
| Generalisability | 21 | Discuss the generalisability (external validity) of the study results <b>Done</b>                                                                                                      |

**Other information**

|         |    |                                                                                                                                                                           |
|---------|----|---------------------------------------------------------------------------------------------------------------------------------------------------------------------------|
| Funding | 22 | Give the source of funding and the role of the funders for the present study and, if applicable, for the original study on which the present article is based <b>Done</b> |
|---------|----|---------------------------------------------------------------------------------------------------------------------------------------------------------------------------|

\*Give information separately for cases and controls in case-control studies and, if applicable, for exposed and unexposed groups in cohort and cross-sectional studies.

**Note:** An Explanation and Elaboration article discusses each checklist item and gives methodological background and published examples of transparent reporting. The STROBE checklist is best used in conjunction with this article (freely available on the Web sites of PLoS Medicine at <http://www.plosmedicine.org/>, Annals of Internal Medicine at <http://www.annals.org/>, and Epidemiology at <http://www.epidem.com/>). Information on the STROBE Initiative is available at [www.strobe-statement.org](http://www.strobe-statement.org).

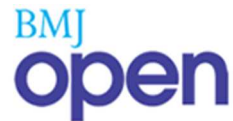

**Is adequate pain relief and time to analgesia associated with emergency department length of stay? A retrospective study.**

|                                 |                                                                                                                                                                                                                                                          |
|---------------------------------|----------------------------------------------------------------------------------------------------------------------------------------------------------------------------------------------------------------------------------------------------------|
| Journal:                        | <i>BMJ Open</i>                                                                                                                                                                                                                                          |
| Manuscript ID:                  | bmjopen-2013-004288.R2                                                                                                                                                                                                                                   |
| Article Type:                   | Research                                                                                                                                                                                                                                                 |
| Date Submitted by the Author:   | 21-Feb-2014                                                                                                                                                                                                                                              |
| Complete List of Authors:       | Sokoloff, Catalina; Hôpital Sacré-Coeur de Montréal, Emergency<br>Daoust, Raoul; Hôpital Sacré-Coeur de Montréal, Emergency<br>Paquet, Jean; Hôpital Sacré-Coeur de Montréal, Emergency<br>Chauny, Jean-Marc; Hôpital Sacré-Coeur de Montréal, Emergency |
| <b>Primary Subject Heading</b>: | Emergency medicine                                                                                                                                                                                                                                       |
| Secondary Subject Heading:      | Emergency medicine, Health services research, Palliative care                                                                                                                                                                                            |
| Keywords:                       | Pain management < ANAESTHETICS, ACCIDENT & EMERGENCY MEDICINE,<br>Organisation of health services < HEALTH SERVICES ADMINISTRATION &<br>MANAGEMENT                                                                                                       |
|                                 |                                                                                                                                                                                                                                                          |

SCHOLARONE™  
Manuscripts

1  
2  
3 **Is adequate pain relief and time to analgesia associated with emergency department**  
4 **length of stay? A retrospective study.**  
5  
6  
7

8  
9 **Corresponding author:** Raoul Daoust  
10 5400 boul. Gouin Ouest,  
11 Montréal, Québec, Canada,  
12 H4J 1C5.  
13 T: 514-338-2222#3318  
14 Fax : 514-338-3513  
15 [raoul.daoust@videotron.ca](mailto:raoul.daoust@videotron.ca)  
16  
17  
18  
19

20  
21 Catalina Sokoloff, MD,<sup>a,b</sup>, Raoul Daoust, MD, MSc<sup>a,b</sup>, Jean Paquet, PhD<sup>a,c</sup>, Jean-Marc  
22 Chauny, MD, MSc<sup>a,b</sup>,  
23  
24  
25  
26

27  
28 <sup>a</sup>Department of Emergency Medicine, Research Centre, Hôpital du Sacré-Cœur de  
29 Montréal, Montréal, Québec, Canada

30  
31 <sup>b</sup>Faculty of Medicine, Université de Montréal, Montréal, Québec, Canada

32  
33 <sup>c</sup>Centre for Advanced Research in Sleep Medicine and Department of Surgery, Hôpital du  
34 Sacré-Coeur de Montréal, Montreal, Quebec, Canada  
35  
36  
37

38 **Keywords :** Analgesia, Length of Stay, Emergency department, Pain relief  
39  
40

41  
42 **Competing interests:** None Declared  
43  
44

45 **Word count (excluding abstract):** 2 353  
46  
47  
48  
49  
50  
51  
52  
53  
54  
55  
56  
57  
58  
59  
60

## ABSTRACT

**Objectives:** Evaluate the association of adequate analgesia and time to analgesia with emergency department (ED) length of stay (LOS).

**Setting and Design:** Post-hoc analysis of real time archived data.

**Participants:** We included all consecutive ED patients  $\geq 18$  years with pain intensity  $>6$  (verbal numerical scale from 0 to 10), assigned to an ED bed, and whose pain was re-evaluated less than 1 hour after receiving analgesic treatment.

**Outcome measures:** The main outcome was ED-LOS in patients who had adequate pain relief (AR =  $\downarrow 50\%$  pain intensity) compared to those who did not have such relief (NR).

**Results:** A total of 2,033 patients (mean age 49.5 years; 51% men) met our inclusion criteria; 58.3% were discharged, and 41.7% were admitted. Among patients discharged or admitted, there was no significant difference in ED-LOS between those with AR (median [25th-75th percentile]: 9.6 hours [6.3-14.8] and 18.2 hours [11.6-25.7], respectively) and NR (median [25th-75th percentile]: 9.6 hours [6.6-16.0] and 17.4 hours [11.3-26.5], respectively). After controlling for confounding factors, rapid time to analgesia (and not adequate pain relief) was associated with shorter ED-LOS of both discharged and admitted patients ( $p < 0.001$  and  $p < 0.05$  respectively). When adjusting for confounding variables, ED-LOS is shortened by 2 hours (95%CI: 1.1-2.8) when delay to receive analgesic is  $<90$  min compared to  $>90$  min for discharged and by 2.3 hours (95%CI: 0.17-4.4) for admitted patients.

**Conclusions:** In our study, adequate pain relief was not linked with short ED-LOS.

However, rapid administration of analgesia was associated with short ED-LOS.

## ARTICLE SUMMARY

### Strengths and limitations of this study

-This is a rare study that examines the association between pain relief and length of stay controlling for multiple confounding variables in a large cohort of emergency department patients.

-The main limitation of our study is its post hoc design and pre-formed database from a single-centre study in an academic hospital.

For peer review only

## INTRODUCTION

Emergency department (ED) overcrowding has been a concern for many years, and Canada is no exception, with nearly 60% of EDs reporting that problem in 2007.<sup>1</sup> The phenomenon of “boarding” is one of the principal factors identified as its cause.<sup>2,3</sup> “Boarding” (or “access block”) refers to situations where bedridden emergency patients wait for the allocation of a bed on the ward for an unreasonably long time period (prolong ED length of stay) with consequent patient overflow in EDs. However, a recent retrospective study revealed that among patients waiting more than 6 hours in the ED, 50% were finally admitted while the other 50% were discharged,<sup>4</sup> indicating that non-boarding patients length of stay (LOS) also contribute to overcrowding. It has been shown to be a strong predictor of low satisfaction among patients<sup>5</sup> and healthcare workers.<sup>1</sup> It is also associated with long hospital LOS,<sup>6,7</sup> and high short- and medium-term mortality rates.<sup>8-10</sup> Furthermore, overcrowding is linked with reduced timeliness and quality of interventions and treatments,<sup>11-13</sup> including delayed analgesic administration,<sup>14,15</sup> particularly when pain is severe,<sup>16</sup> all of which contribute to the snowball effect of cumulating waits.

Pain represents more than 40% of consultations in EDs.<sup>17</sup> In large studies of patients with moderate to severe pain, only 21 to 68%<sup>18-27</sup> received analgesics, and 50 to 74% still had moderate to severe pain at discharge.<sup>17</sup> Severe, persistent pain may also lead to unwanted physiological responses, namely, increased adrenergic tone, augmented oxygen consumption, predisposition to hypercoagulability, decreased immune function, and heightened risk of delirium.<sup>28,29</sup> Moreover, adequate and timely treatment of acute pain could reduce the risk of chronic pain.<sup>17</sup> The relationship between pain management



1  
2  
3 and LOS has not been studied has a primary outcome. However, a study of intermittent  
4 injection vs patient-controlled analgesia (PCA) for sickle cell crisis pain in the ED,  
5  
6 established that PCA was associated with a significant reduction in length of ED stay,  
7  
8  
9 although there was no difference in initial or final pain intensity score<sup>30</sup>.  
10  
11

12  
13 Recent studies have attempted to identify the factors contributing to prolonged  
14 ED-LOS. Many of them have already been recognized, namely, number of laboratory  
15 examinations required, having to undergo X-ray or scan, the need for more than 3  
16 medications, and number of consultants.<sup>10,31</sup> To the best of our knowledge, the adequacy  
17 and effectiveness of pain management have never been investigated in this regard. We  
18 sought to evaluate which component of initial pain management was associated with ED-  
19 LOS reduction. We hypothesized that ED-LOS would be lessened in patients with  
20 significant pain relief.  
21  
22  
23  
24  
25  
26  
27  
28  
29  
30  
31  
32  
33

## 34 MATERIALS AND METHODS

### 36 Study design

37  
38 We conducted *post hoc* analysis of real time archived data on all consecutive  
39 patients presenting with severe pain at our ED between March 2008 and February 2011.  
40  
41 The aim of our study was to assess if pain relief was associated with ED-LOS reduction.  
42  
43 As a secondary objective, we evaluated if time to receiving analgesic treatment was  
44  
45 linked with lessened ED-LOS.  
46  
47  
48  
49  
50  
51

### 53 Setting

1  
2  
3 Hôpital du Sacré-Cœur de Montreal is an urban, adult, level I trauma center with  
4  
5 540 inpatient beds and 60,000 ED visits per year. It sustains 22,000 hospitalizations  
6  
7 annually, of which 51% are admitted through the ED. The study was approved by the  
8  
9 institutional review board.  
10  
11

### 12 13 14 15 **Selection of participants**

16  
17 Patients 18 years or older were included if they were assigned to an ED treatment  
18  
19 bed, had severe pain at triage (defined as >6 on an 11-point verbal numerical scale from 0  
20  
21 to 10),<sup>32-34</sup> received an analgesic, and had their pain intensity re-evaluated in less than 1  
22  
23 hour after such medication.  
24  
25

26  
27 Patients were excluded if they died during their ED stay, were pregnant or had  
28  
29 been transferred from another hospital. We also excluded patients with altered mental  
30  
31 status, intoxicated subjects, and anyone with chest pain necessitating emergent PCI,  
32  
33 because their LOS could be determined by treatments other than pain management.  
34  
35

### 36 37 38 **Data collection**

39  
40 Data were extracted from computerized information and nursing records in our  
41  
42 ED (MedUrge<sup>TM</sup>, MediaMed Technologies, Mont-Saint-Hilaire, Québec, Canada). This  
43  
44 system is an integrated and mandatory working tool for all physicians, nursing staff, and  
45  
46 any employee involved in the ED healthcare process. It contains all demographic data,  
47  
48 triage information (including vital signs, purpose of consultation, and pain level when  
49  
50 relevant) as well as any pertinent data collected in real time by nurses during their re-  
51  
52 evaluation rounds, including medication administration, and pain intensity.  
53  
54  
55  
56  
57  
58  
59  
60

## Data processing

The cut-off of  $>6$  on 10 was chosen because it was felt that lower pain intensity is less likely to warrant observation in itself. ED-LOS was measured in hours from the time of arrival at the ED to discharge or admission to a ward. We defined adequate pain relief (AR) as reduction of 50% or more of the initial pain level scored on the numerical scale within 1 hour after receiving the first analgesic. The 50% reduction and the 1-hour threshold are based on previous literature suggesting that they represent a meaningful decline<sup>35,36</sup> and acceptable delay in managing severe pain.<sup>34,37,38</sup> Initial pain was the one reported on the triage form. Time between arrival and analgesic administration was dichotomized into  $\leq 90$  minutes versus  $>90$  minutes and also analyzed by three category ( $<1$  hour; between 1 and 2 hour;  $>2$  hour). We selected a 90-minute threshold because it is the median time to analgesia reported in many EDs with a pain scale integrated in their triage assessment.<sup>19,39,40</sup>

Our primary outcome was ED-LOS of patients with and without adequate pain relief. Our secondary outcome was ED-LOS of patients who received their medication in  $\leq 90$  minutes compared to those who received it after a longer time period.

## Data analysis

Median LOS (25th-75th percentile) between groups of patients was compared by the Mann-Whitney U test and relationship among LOS and continuous predictors by Spearman rank-order correlations. Median differences and their 95% confidence interval are also reported. All LOS are presented in hours and separately for patients with

1  
2  
3 intravenous versus patients with other than intravenous route of analgesia administration.  
4  
5 To examine the relative influence of adequate pain relief and time to analgesia on LOS,  
6  
7 generalized linear model regressions with Gamma distribution and a log link function  
8  
9 were undertaken for patients discharged from the ED and those admitted to a ward,  
10  
11 controlling for age, gender, route of analgesia administration (IV vs other), number of  
12  
13 dose of analgesia, type of arrival at ED (ambulance or walk in), triage priority (high vs  
14  
15 low), crowding defined as number of patients in ED beds at the time of arrival, time of  
16  
17 day of arrival with high or low LOS (calculated from a database of 162 000 patients of 18  
18  
19 years or older assigned to a bed between March 2008 and February 2011 from the same  
20  
21 ED and selecting hours of arrival with high LOS and hours of arrival with low LOS),  
22  
23 time between arrival and physician's first assessment, number of examinations, number  
24  
25 of specialty consultations, baseline pain intensity score, trauma versus non-trauma,  
26  
27 abdominal pain versus other, need for oxygen and for isolation. Generalized linear model  
28  
29 was chosen because LOS is largely skewed and tends to produce less prediction errors  
30  
31 than traditional linear regression<sup>41</sup>. Mean LOS difference and Wald 95% CI adjusted at  
32  
33 mean covariates were produced from estimated marginal means. The Canadian healthcare  
34  
35 system being public and free, the presence or absence of insurance was not analyzed.  
36  
37 Alpha level was set at 0.05 for all statistical tests. All data were analyzed with SPSS  
38  
39 version 20 (IBM, Somers, NY).  
40  
41  
42  
43  
44  
45  
46  
47  
48  
49

## 50 RESULTS

51  
52  
53  
54  
55  
56  
57  
58  
59  
60

A total of 2,033 patients met our inclusion and exclusion criteria. Of these patients, about half (51%) were male, more than two third arrived at ED alone, 1,186 (58.3%) were finally discharged and 847 were admitted (Table 1).

Among patients who were discharged from the ED, 45.7% had AR compared to 40.3% of admitted patients. There was no significant difference in ED-LOS between patients with AR compared to those without adequate relief (NR) ( $p=0.41$  for discharged patients and  $p=0.87$  for admitted patients) (Table 2).

Table 1. Patient characteristics of the whole sample

| Characteristics                     | Total (N=2,033) |
|-------------------------------------|-----------------|
| Mean age ( $\pm$ SD)                | 49.5 (17.0)     |
| % male                              | 51.0            |
| % Triage priority                   |                 |
| -high (1-2)                         | 45.3            |
| -low (3-4-5)                        | 54.7            |
| % Arrival                           |                 |
| -ambulance                          | 29.2            |
| -walk in                            | 70.8            |
| % -admitted                         | 41.7            |
| -discharged                         | 58.3            |
| % -treated with opiates only        | 66.7            |
| -treated with non-opiates only      | 11.1            |
| -treated with combination           | 22.2            |
| % Route of analgesia administration |                 |
| -IV                                 | 62.0            |
| -other                              | 38.0            |
| % with trauma injury                | 7.6             |
| % with abdominal pain               | 39.5            |
| % with blood test                   | 6.4             |
| % with heart-rate monitoring        | 11.7            |

|                                                                                           |                 |
|-------------------------------------------------------------------------------------------|-----------------|
| % with oxygen support                                                                     | 9.5             |
| % in isolation                                                                            | 4.5             |
| Mean ( $\pm$ SD) baseline pain intensity score                                            | 8.8 (1.1)       |
| Mean ( $\pm$ SD) final pain intensity score                                               | 5.1 (3.0)       |
| Median LOS in hours (25th-75th percentile)                                                | 12.3 (7.8-20.3) |
| Median time between arrival at ED and analgesic treatment in hours (25th-75th percentile) | 1.8 (1.1-3.2)   |
| Median time to patient care by physician in hours (25th-75th percentile)                  | 0.72 (0.42-1.4) |

---

LOS: length of stay

Among patients who were discharged from the ED, 533 (45%) received analgesia  $\leq$ 90 minutes, with unadjusted ED-LOS reduction of 2.2 hours (95%CI: 1.4-3.0;  $p < 0.001$ ) compared to those with  $>$ 90 minutes. The same analysis was applied to patients being admitted: only 265 (31%) received their medication in that interval, and their median unadjusted ED-LOS reduction was 3.9 hours (95%CI: 2.0-5.7;  $p < 0.001$ ) (Table 2). Median ED-LOS for three different times to receive analgesia is displayed in table 3.

Table 2. Median unadjusted length of stay differences (25th-75th percentiles) for pain relief groups and time to analgesia groups.

|                      | LOS in hour<br>Median (25th-75th<br>percentile) | LOS in hour<br>Median (25th-75th<br>percentile) | Median difference<br>( $\pm$ 95% CI) |
|----------------------|-------------------------------------------------|-------------------------------------------------|--------------------------------------|
| Disposition after ED | Adequate relief                                 | No adequate relief                              |                                      |
| Discharged patients: | 9.6 (6.3-14.8)                                  | 9.6 (6.6-16.0)                                  | 0.02 (-0.81-0.86)                    |

|                      |                       |                    |                 |
|----------------------|-----------------------|--------------------|-----------------|
| Admitted patients:   | 18.2 (11.6-25.7)      | 17.4 (11.3-26.5)   | -0.8 (-2.8-1.1) |
| Total:               | 11.9 (7.8-19.6)       | 12.6 (7.8-20.6)    | -0.7 (-1.6-0.3) |
| Disposition after ED | $\leq 1.5$ hour delay | $> 1.5$ hour delay |                 |
| Discharged patients: | 8.5 (5.8-12.5)        | 10.8 (7.3-17.7)    | 2.2* (1.4-3.0)  |
| Admitted patients:   | 15.2 (10.4-22.6)      | 19.1 (11.8-27.6)   | 3.9* (2.0-5.7)  |
| Total:               | 10.1 (6.6-16.3)       | 14.1 (9.0-22.7)    | 4.0* (2.3-5.6)  |

LOS: length of stay; \*p<0.001

Table 3. Median length of stay (25th-75th percentiles) for three different times to receive analgesia controlled for route of analgesia administration for discharged and admitted patients.

| Disposition after ED                 | IV LOS in hour<br>Median (25th-75th<br>percentile) | Other than IV LOS<br>in hour<br>Median (25th-75th<br>percentile) |
|--------------------------------------|----------------------------------------------------|------------------------------------------------------------------|
| Discharged patients:                 | (N=698)                                            | (N=481)                                                          |
| Time to receive analgesia: - <1 hour | 8.6 (6.0-11.8)                                     | 6.6 (4.4-9.5)                                                    |
| - from 1 to 2 hour                   | 10.5 (6.9-15.9)                                    | 8.2 (5.4-12.2)                                                   |
| - >2 hour                            | 12.9 (8.9-18.0)                                    | 10.1 (6.3-19.2)                                                  |
| Admitted patients:                   | (N=556)                                            | (N=289)                                                          |
| Time to receive analgesia: - <1 hour | 16.4 (10.8-23.8)                                   | 17.2 (10.7-24.8)                                                 |
| - from 1 to 2 hour                   | 14.9 (10.4-22.6)                                   | 18.1 (10.0-26.4)                                                 |
| - >2 hour                            | 18.7 (11.6-27.4)                                   | 19.6 (12.9-28.7)                                                 |

LOS: length of stay; IV: intravenous route of analgesia administration; without IV: other than intravenous route of analgesia administration

Table 4 and 5 show the bivariate relations between LOS and all confounding variables controlled for route of analgesia administration for discharged and admitted patients respectively. For discharged patients with IV route of analgesia administration, only type of arrival, crowding and baseline pain intensity score were not related to LOS while for other than IV route of analgesia administration, type of arrival, triage priority, oxygen support, time of day LOS, crowding and baseline pain intensity score were not associated with LOS. For admitted patients with IV route of analgesia administration, triage priority, type of arrival, blood testing, time of day LOS, crowding, number of dose and baseline pain intensity score were not related to LOS while for other than IV route of analgesia administration, gender, triage priority, type of arrival, trauma injury, abdominal pain, time of day LOS and physician taking charge delay were not associated with LOS.

Table 4. Relationship between length of stay and all confounding variables for **discharged** patients.

| Confounding variables        | IV LOS in hour<br>(N=702)        | Other than IV LOS in<br>hour (N=484) |
|------------------------------|----------------------------------|--------------------------------------|
| Categorical confounders:     | Median (25th-75th<br>percentile) | Median (25th-75th<br>percentile)     |
| Gender: -male                | 9.5 (6.7-15.0)**                 | 8.0 (5.5-12.3)**                     |
| -female                      | 11.1 (7.9-16.9)                  | 9.8 (6.1-18.4)                       |
| Triage priority: -high (1-2) | 9.7 (6.7-15.3)**                 | 8.8 (5.8-13.1)                       |
| -low (3-4-5)                 | 10.8 (7.9-17.0)                  | 8.8 (5.8-15.0)                       |
| Arrival: -ambulance          | 10.8 (7.3-16.3)                  | 8.8 (5.7-15.5)                       |
| -walk in                     | 10.0 (7.2-15.7)                  | 8.7 (5.8-13.5)                       |
| Trauma injury: -Yes          | 7.1 (4.1-13.0)**                 | 6.4 (4.6-12.7)**                     |
| -No                          | 10.4 (7.3-15.9)                  | 9.0 (5.9-14.8)                       |
| Abdominal pain: -Yes         | 11.3 (7.8-17.5)**                | 10.5 (5.7-13.4)**                    |



|                                                |                                 |                                 |
|------------------------------------------------|---------------------------------|---------------------------------|
| -No                                            | 9.6 (6.9-14.6)                  | 8.3 (6.9-14.6)                  |
| Blood test: -Yes                               | 16.4 (10.2-23.6)**              | 18.5 (11.6-25.0)**              |
| -No                                            | 10.0 (7.1-15.5)                 | 8.6 (5.8-13.8)                  |
| Heart-rate monitoring: -Yes                    | 14.6 (10.6-24.4)**              | 12.7 (9.2-27.8)**               |
| -No                                            | 9.8 (6.9-15.2)                  | 8.2 (5.7-13.4)                  |
| Oxygen support: -Yes                           | 13.5 (8.7-23.0)**               | 10.4 (8.7-23.0)                 |
| -No                                            | 10.0 (7.1-15.4)                 | 8.6 (5.7-14.0)                  |
| Isolation: -Yes                                | 22.7 (11.3-36.7)**              | 22.6 (11.7-44.3)**              |
| -No                                            | 10.0 (7.1-15.7)                 | 8.6 (5.8-13.5)                  |
| Time of day of arrival with: -low LOS          | 9.0 (7.1-10.7)**                | 8.6 (6.1-10.4)                  |
| -high LOS                                      | 11.1 (7.2-16.9)                 | 8.8 (5.7-15.2)                  |
| Continuous confounders:                        | Spearman rank-order correlation | Spearman rank-order correlation |
| Age:                                           | 0.18**                          | 0.09*                           |
| Crowding:                                      | 0.06                            | -0.06                           |
| Physician taking charge delay:                 | 0.21**                          | 0.19**                          |
| Number of exams (range 0-15):                  | 0.33**                          | 0.29**                          |
| Number of specialist consultation (range 0-8): | 0.41**                          | 0.44**                          |
| Number of dose (range 1-7):                    | -0.13**                         | -0.10*                          |
| Baseline pain intensity score:                 | -0.06                           | -0.01                           |

LOS : length of stay; IV: intravenous route of analgesia administration; other than IV: other than intravenous route of analgesia administration; \*p<0.05; \*\*p<0.01

Table 5. Relationship between length of stay and all confounding variables for **admitted** patients.

| Confounding variables        | IV LOS in hour<br>(N=558)        | Other than IV LOS in<br>hour (N=289) |
|------------------------------|----------------------------------|--------------------------------------|
| Categorical confounders:     | Median (25th-75th<br>percentile) | Median (25th-75th<br>percentile)     |
| Gender: -male                | 15.4 (10.5-23.6)*                | 18.9 (11.4-27.5)                     |
| -female                      | 18.0 (11.7-25.4)                 | 19.5 (12.7-27.9)                     |
| Triage priority: -high (1-2) | 16.4 (10.4-24.5)                 | 18.4 (11.1-25.8)                     |
| -low (3-4-5)                 | 17.2 (11.7-25.0)                 | 19.5 (12.9-27.6)                     |

|                                                |                                 |                                 |
|------------------------------------------------|---------------------------------|---------------------------------|
| Arrival: -ambulance                            | 17.0 (10.7-25.3)                | 20.7 (13.5-28.4)                |
| -walk in                                       | 16.6 (11.4-24.5)                | 18.4 (12.0-26.9)                |
| Trauma injury: -Yes                            | 12.5 (8.7-21.1)*                | 15.7 (8.2-27.6)                 |
| -No                                            | 17.0 (11.4-24.8)                | 19.4 (12.6-27.6)                |
| Abdominal pain: -Yes                           | 16.0 (10.9-23.3)*               | 19.4 (12.9-26.7)                |
| -No                                            | 18.0 (11.5-27.6)                | 19.3 (11.6-28.2)                |
| Blood test: -Yes                               | 19.8 (11.8-28.5)                | 27.9 (16.4-35.8)**              |
| -No                                            | 16.4 (10.9-24.5)                | 18.8 (11.6-26.8)                |
| Heart-rate monitoring: -Yes                    | 23.1 (16.2-38.6)**              | 30.0 (25.3-45.2)**              |
| -No                                            | 15.6 (10.7-23.1)                | 17.8 (11.3-25.7)                |
| Oxygen support: -Yes                           | 20.9 (12.3-34.4)**              | 26.8 (15.1-45.0)**              |
| -No                                            | 15.9 (10.8-24.1)                | 18.7 (11.7-26.7)                |
| Isolation: -Yes                                | 30.1 (21.8-54.3)**              | 35.5 (22.6-57.8)**              |
| -No                                            | 15.9 (10.8-23.8)                | 18.5 (11.6-26.7)                |
| Time of day of arrival with: -low LOS          | 15.7 (9.7-29.1)                 | 16.2 (10.6-24.2)                |
| -high LOS                                      | 17.0 (11.4-24.5)                | 19.8 (12.7-27.8)                |
| Continuous confounders:                        | Spearman rank-order correlation | Spearman rank-order correlation |
| Age:                                           | 0.15**                          | 0.22**                          |
| Crowding:                                      | 0.03                            | 0.17**                          |
| Physician taking charge delay:                 | 0.16**                          | 0.06                            |
| Number of exams (range 0-15):                  | 0.34**                          | 0.36**                          |
| Number of specialist consultation (range 0-8): | 0.31**                          | 0.37**                          |
| Number of dose (range 1-7):                    | -0.03                           | -0.15**                         |
| Baseline pain intensity score:                 | 0.003                           | -0.12*                          |

LOS : length of stay; IV: intravenous route of analgesia administration; other than IV: other than intravenous route of analgesia administration; \*p<0.05; \*\*p<0.01

Multivariate analysis showed that when controlling for confounding variables, a brief time period ( $\leq 90$  minutes) before analgesic administration (and not adequate pain relief) is associated with shortened ED-LOS for both discharged and admitted patients ( $\beta=0.16$ ; 95% confidence interval (95% CI): 0.10-0.22;  $p<0.001$  and  $\beta=0.09$ ; 95% CI: 0.006-0.18;  $p<0.05$ , respectively). When adjusting for confounding variables, ED-LOS is

1  
2  
3 shortened by 2 hours (95%CI: 1.1-2.8;  $p<0.001$ ) when time to receive analgesic is  $<90$   
4  
5 min compared to  $>90$  min for discharged and by 2.3 hours (95%CI: 0.17-4.4;  $p<0.05$ ) for  
6  
7 admitted patients.  
8  
9

## 10 11 12 13 **LIMITATIONS**

14  
15 The main limitation of our study is its post hoc design and pre-formed database.  
16  
17 Potential confounding variables, such as ethnicity and linguistic barrier, which are not  
18  
19 recorded in demographic charts of our computerized system, could not be taken into  
20  
21 consideration. Time from pain onset, component of chronic pain and pharmacological or  
22  
23 non-pharmacological analgesia prior to arrival at the ED were also unknown. Case  
24  
25 complexity assessment was difficult, although we controlled for number of examinations,  
26  
27 number of consultants, need for oxygen and for isolation, which are markers of  
28  
29 complexity. Likewise, we do not know if some patients did not receive an analgesic nor  
30  
31 had suboptimal pain management because of refusal. However, it is doubtful that any of  
32  
33 these confounding variables would cause significant differential bias. Finally, our single-  
34  
35 center study in an academic hospital might limit the generalization of our results.  
36  
37  
38  
39  
40  
41  
42

## 43 44 **DISCUSSION**

45  
46 As far as we know, this is the first investigation to evaluate the impact of pain  
47  
48 relief on ED-LOS, and our results demonstrated that rapid administration of analgesia,  
49  
50 and not adequate pain relief, is associated with shorter ED-LOS. It has been reported that  
51  
52 patients expect to receive pain medication 25 to 30 minutes after their arrival,<sup>42</sup> which  
53  
54 coincides with the guidelines of our triage system (Canadian Emergency Department  
55  
56  
57  
58  
59  
60

1  
2  
3 Triage and Acuity Scale).<sup>43</sup> Unfortunately, this goal is far from being achieved in many  
4  
5 EDs, not only in Canada, but also around the world.<sup>19,27,42</sup> This is a persistent problem  
6  
7 that dates back to the late 1980s when Wilson and Pendleton first defined the term  
8  
9  
10 “oligoanalgesia”.<sup>44</sup>  
11

12  
13 More recently, the Pain and Emergency Medicine Initiative study demonstrated  
14  
15 that patient satisfaction was associated more with the way ED physicians responded to  
16  
17 their complaints of pain than to the actual result of pain treatment.<sup>19</sup> Which components  
18  
19 of this response to pain were significant was not specified, but a possible part of it was  
20  
21 the promptness with which pain was addressed. Patients with severe pain probably  
22  
23 associate receiving pain medication quickly with quality of care and are more inclined to  
24  
25 accept a medical treatment plan, even if they do not get relief. This might explain why  
26  
27 we observed improved ED-LOS with prompt analgesic administration in patients being  
28  
29 discharged or admitted.  
30  
31  
32  
33

34  
35 In our study, the adjusted ED-LOS was 2 hours shorter in discharged patients who  
36  
37 received their medication in  $\leq 90$  minutes than in those treated in  $> 90$  minutes. The rapid  
38  
39 administration of analgesia, associated with shorter ED-LOS, could have a significant  
40  
41 impact on ED overcrowding. For example, our center received an average of 5,000  
42  
43 patients per year with severe pain on an ED bed. If we extrapolate the proportion of  
44  
45 patient who received analgesia  $>90$  minutes after arrival and the time saved if received in  
46  
47 less than 90 minutes from our study to this population, a bed could be available during 16  
48  
49 hours every day. Such economy of beds would contribute to better throughput of patients  
50  
51 and render our EDs more efficient, as espoused by Asplin et al. with their conceptual  
52  
53 model of overcrowding in 2003.<sup>2</sup>  
54  
55  
56  
57  
58  
59  
60

1  
2  
3 A recent consensus of the Canadian Association of Emergency Physicians has  
4 ranked “ED-LOS” and “Time to first dose of analgesic” in the top 12 priority indicators  
5 of quality care.<sup>45</sup> In the USA, the Joint Commission on Accreditation of Healthcare  
6 Organizations mentions “early intervention” as the first goal in the treatment of acute  
7 pain.<sup>37</sup> Similarly, the Australian National Institute of Clinical Studies ranked “reduced  
8 time to analgesia” as the top priority and is currently working on improving their  
9 numbers.<sup>42</sup>

10  
11  
12  
13  
14  
15  
16  
17  
18  
19  
20 New solutions are being proposed to improve the initial approach to pain  
21 management. For example, the simple act of making pain scoring mandatory at triage has  
22 been shown to reduce time to analgesia by 45 minutes.<sup>40</sup> Extension of this practice could  
23 also integrate pain treatment as early as triage to limit further delays. Such measures have  
24 been introduced in Australia where nurse-initiated pain protocols are currently being  
25 evaluated. A pediatric ED study has shown 50% reduction of time to analgesia with such  
26 a protocol.<sup>39</sup> Early administration of analgesics has been investigated in pre-hospital  
27 settings, and appears to be safe and effective, particularly with the use of intranasal  
28 Fentanyl.<sup>46,47</sup> Even if no study has yet shown a benefit of this practice in LOS, it certainly  
29 has promising advantages, and further investigations should be considered.

30  
31  
32  
33  
34  
35  
36  
37  
38  
39  
40  
41  
42  
43 In summary, we found that shorter time to analgesia administration is associated  
44 with ED-LOS reduction. This observation supports recent interest in analgesia  
45 implementation as early as triage or in pre-hospital settings to improve the throughput  
46 component of the overcrowding phenomenon seen in EDs around the world.  
47  
48  
49  
50  
51  
52  
53  
54  
55  
56  
57  
58  
59  
60

1  
2  
3 **Contributors** CS, RD and JMC conceived the study and obtained research funding. JP  
4  
5 mined and analyzed the data. CS drafted the manuscript, and all authors contributed  
6  
7 substantially to its revision. CS takes responsibility for the paper as a whole. All co-  
8  
9 authors have had the opportunity to review the final manuscript and have provided their  
10  
11 permission to publish the manuscript.  
12  
13

14  
15  
16  
17 **Funding** This study was supported by the Emergency Department Research Fund of  
18  
19 Hôpital du Sacré-Coeur de Montréal.  
20  
21

22  
23  
24 **Competing interests** None.  
25  
26

27 **Data Sharing Statement:** No additionnal unpublished data is available.  
28  
29

30 **Ethics approval** The study was approved by the institutional review board.  
31  
32

33 **Provenance and peer review** Not commissioned; externally peer reviewed.  
34  
35  
36  
37  
38  
39  
40  
41  
42  
43  
44  
45  
46  
47  
48  
49  
50  
51  
52  
53  
54  
55  
56  
57  
58  
59  
60

**BIBLIOGRAPHY**

1. Bond K, Ospina MB, Blitz S, et al. Frequency, determinants and impact of overcrowding in emergency departments in Canada: a national survey. *Healthc Q* 2007;10:32-40.
2. Asplin BR, Magid DJ, Rhodes KV, et al. A conceptual model of emergency department crowding. *Ann Emerg Med* 2003;42:173-80.
3. Health Technology Assessment – Strategies to reduce emergency department overcrowding, Alberta Heritage Foundation for Medical Research, 2006.
4. Henneman PL, Nathanson BH, Li H, et al. Emergency department patients who stay more than 6 hours contribute to crowding. *J Emerg Med* 2010;39:105-12.
5. Taylor C. Patient satisfaction in emergency medicine. *Emerg Med J* 2004;21:528-32.
6. Bernstein SL, Aronsky D, Duseja R, et al. The effect of emergency department crowding on clinically oriented outcomes. *Acad Emerg Med* 2009;16:1-10.
7. Richardson DB. The access-block effect: relationship between delay to reaching an inpatient bed and inpatient length of stay. *Med J Aust* 2002;177:492-5.
8. Richardson DB. Increase in patient mortality at 10 days associated with emergency department overcrowding. *Med J Aust* 2006;184:213-6.
9. Sprivulis PC, Da Silva JA, Jacobs IG, et al. The association between hospital overcrowding and mortality among patients admitted via Western Australian emergency departments. *Med J Aust* 2006;184:208-12.

- 1  
2  
3  
4  
5  
6  
7  
8  
9  
10  
11  
12  
13  
14  
15  
16  
17  
18  
19  
20  
21  
22  
23  
24  
25  
26  
27  
28  
29  
30  
31  
32  
33  
34  
35  
36  
37  
38  
39  
40  
41  
42  
43  
44  
45  
46  
47  
48  
49  
50  
51  
52  
53  
54  
55  
56  
57  
58  
59  
60
10. Mowery NT, Dougherty SD, Hildreth AN, et al. Emergency department length of stay is an independent predictor of hospital mortality in trauma activation patients. *J Trauma* 2011;70:1317-25.
11. Miró O, Antonio MT, Jiménez S, et al. Decreased health care quality associated with emergency department overcrowding. *Eur J Emerg Med* 1999;6:105-7.
12. Trzeciak S, Rivers EP. Emergency department overcrowding in the United States: an emerging threat to patient safety and public health. *Emerg Med J* 2003;20:402-5.
13. Joint Commission on Accreditation Healthcare Organizations, Sentinel Event Alert - Delays in treatment. Issue 26, June 2002
14. Hwang U, Morrison R, Harris B, et al. The association of ED crowding factors with quality of pain management. *Acad Emerg Med* 2007;14:S54.
15. Hwang U, Richardson LD, Sonuyi TO, et al. The effect of emergency department crowding on the management of pain in older adults with hip fracture. *J Am Geriatr Soc* 2006;54:270-5.
16. Pines JM, Hollander JE. Emergency department crowding is associated with poor care for patients with severe pain. *An Emerg Med* 2008;51:1-5.
17. Sinatra R. Causes and consequences of inadequate management of acute pain. *Pain Med* 2010;11:1859-71.
18. Selbst SM. Analgesic use in the emergency department. *Ann Emerg Med* 1990;19:1010-13.



- 1  
2  
3 19. Todd KH, Ducharme J, Choiniere M, et al. Pain in the emergency department:  
4 results of the pain and emergency medicine initiative (PEMI) multicenter study. *J*  
5  
6 *Pain* 2007;8:460-6.  
7  
8
- 9  
10 20. Todd KH, Sloan EP, Chen C, et al. Survey of pain etiology, management  
11  
12 practices and patient satisfaction in two urban emergency departments. *CJEM*  
13  
14 2002;4:252-6.  
15  
16
- 17 21. Silka PA. Pain scores improve analgesic administration patterns for trauma  
18  
19 patients in the emergency department. *Acad Emerg Med* 2004;11:264-70.  
20  
21
- 22 22. Stalnikowicz R, Mahamid R, Kaspi S, et al. Undertreatment of acute pain in the  
23  
24 emergency department: a challenge. *Int J Qual Health Care* 2005;17:173-6.  
25  
26
- 27 23. Chen EH, Shofer FS, Dean AJ, et al. Gender disparity in analgesic treatment of  
28  
29 emergency department patients with acute abdominal pain. *Acad Emerg Med*  
30  
31 2008;15:414-8.  
32  
33
- 34 24. Singer AJ, Garra G, Chohan JK, et al. Triage pain scores and the desire for and  
35  
36 use of analgesics. *Ann Emerg Med* 2008;52:689-95.  
37  
38
- 39 25. Yakuna M, Soffer D, Halpern P, et al. An interventional study to improve the  
40  
41 quality of analgesia in the emergency department. *CJEM* 2008;10:435-9.  
42  
43
- 44 26. Pines JM, Shofer FS, Isserman JA, et al. The effect of emergency department  
45  
46 crowding on analgesia in patients with back pain in two hospitals. *Acad Emerg*  
47  
48 *Med* 2010;17:276-83.  
49
- 50 27. Grant PS. Analgesia delivery in the ED. *Am J Emerg Med* 2006;24:806-9.  
51  
52  
53  
54  
55  
56  
57  
58  
59  
60

- 1  
2  
3  
4  
5  
6  
7  
8  
9  
10  
11  
12  
13  
14  
15  
16  
17  
18  
19  
20  
21  
22  
23  
24  
25  
26  
27  
28  
29  
30  
31  
32  
33  
34  
35  
36  
37  
38  
39  
40  
41  
42  
43  
44  
45  
46  
47  
48  
49  
50  
51  
52  
53  
54  
55  
56  
57  
58  
59  
60
28. Dunwoody CJ, Krenzischek DA, Pasero C, et al. Assessment, physiological monitoring, and consequences of inadequately treated acute pain. *Pain Manag Nurs* 2008;9:11-21.
  29. Morrison RS, Magaziner J, Gilbert M, et al., Relationship between pain and opioid analgesics on the development of delirium following hip fracture. *J Gerontol A Biol Sci Med Sci* 2003;58:76-81.
  30. Gonzalez ER, Bahal N, Hansen LA, et al. Intermittent injection vs patient-controlled analgesia for sickle cell crisis pain. Comparison in patients in the emergency department. *Arch Intern Med* 1991;151:1373-78.
  31. Gardner RL, Sarkar U, Maselli JH, et al. Factors associated with longer ED lengths of stay. *Am J Emerg Med* 2007;25:643-50.
  32. Aubrun F, Langeron O, Quesnel C, et al. Relationships between measurement of pain using visual analog score and morphine requirements during postoperative intravenous morphine titration. *Anesthesiology* 2003;98:1415-21.
  33. Macintyre PE, Scott DA, Schug SA, et al. Acute Pain Management: Scientific Evidence, 3<sup>rd</sup> edition. Australian and New Zealand College of Anaesthetists. 2010; p. 491.
  34. Smith S, Radcliffe J. Guidelines for the management of pain in adults. Clinical Guidelines 2010.
  35. Moore A, McQuay H, Gavaghan D, et al. Deriving dichotomous outcome measures from continuous data in randomised controlled trials of analgesics. *Pain* 1996;66:229-37.

- 1  
2  
3  
4  
5  
6  
7  
8  
9  
10  
11  
12  
13  
14  
15  
16  
17  
18  
19  
20  
21  
22  
23  
24  
25  
26  
27  
28  
29  
30  
31  
32  
33  
34  
35  
36  
37  
38  
39  
40  
41  
42  
43  
44  
45  
46  
47  
48  
49  
50  
51  
52  
53  
54  
55  
56  
57  
58  
59  
60
36. Moore A, McQuay H, Gavaghan D, et al. Deriving dichotomous outcome measures from continuous data in randomised controlled trials of analgesics: verification from independent data. *Pain* 1997;69:127-30.
  37. Joint Commission on Accreditation Healthcare Organizations, Pain: current understanding of assessment, management, and treatments. 2001; p. 92.
  38. Carns P. Healthcare Guideline: Assessment and Management of Acute Pain, 6<sup>th</sup> edition. Institute for Clinical Systems Improvement. 2008; p. 58.
  39. Boyd RJ. The efficacy of structured assessment and analgesia provision in the paediatric emergency department. *Emerg Med J* 2005;22:30-2.
  40. Vazirani J, Knott JC. Mandatory pain scoring at triage reduces time to analgesia. *Ann Emerg Med* 2012;59:134-38.
  41. Austin PC, Rothwell DM, Tu JV. A comparison of statistical modeling strategies for analyzing length of stay after CABG surgery. *Health Serv Outcomes Res Methodol* 2002;3:107-33.
  42. National Institute of Clinical Studies - National Emergency Department Collaborative Final Report, Melbourne Australia's, April 2004.
  43. Beveridge RC, Clarke B, Janes L, et al. Implementation guidelines for the Canadian Emergency Department Triage and Acuity Scale. Endorsed by the Canadian Association Of Emergency Physicians (CAEP), the National Emergency Nurses Affiliation of Canada (NENA), and L'association des médecins d'urgence du Québec (AMUQ). 1998; p. 1-32.
  44. Wilson JE, Pendleton JM. Oligoanalgesia in the emergency department. *Am J Emerg Med* 1989;7:620-3.

- 1  
2  
3  
4  
5  
6  
7  
8  
9  
10  
11  
12  
13  
14  
15  
16  
17  
18  
19  
20  
21  
22  
23  
24  
25  
26  
27  
28  
29  
30  
31  
32  
33  
34  
35  
36  
37  
38  
39  
40  
41  
42  
43  
44  
45  
46  
47  
48  
49  
50  
51  
52  
53  
54  
55  
56  
57  
58  
59  
60
45. Schull MJ, Guttman A, Leaver CA, et al. Prioritizing performance measurement for emergency department care: consensus on evidence-based quality of care indicators. *CJEM* 2011;13:300-9.
46. Bendall JC, Simpson PM, Middleton PM, et al. Effectiveness of prehospital morphine, Fentanyl, and Methoxyflurane in pediatric patients. *Prehosp Emerg Care* 2011;15:158-65.
47. Krauss WC, Shah S, Shah S, et al. Fentanyl in the out-of-hospital setting: variables associated with hypotension and hypoxemia. *J Emerg Med* 2011;40:182-7.

1  
2  
3 **Is adequate pain relief and time to analgesia associated with emergency department**  
4 **length of stay? A retrospective study.**  
5  
6  
7

8  
9 **Corresponding author:** Raoul Daoust  
10 5400 boul. Gouin Ouest,  
11 Montréal, Québec, Canada,  
12 H4J 1C5.  
13 T: 514-338-2222#3318  
14 Fax : 514-338-3513  
15 [raoul.daoust@videotron.ca](mailto:raoul.daoust@videotron.ca)  
16  
17  
18  
19  
20

21 Catalina Sokoloff, MD,<sup>a,b</sup>, Raoul Daoust, MD, MSc<sup>a,b</sup>, Jean Paquet, PhD<sup>a,c</sup>, Jean-Marc  
22 Chauny, MD, MSc<sup>a,b</sup>,  
23  
24  
25  
26

27  
28 <sup>a</sup>Department of Emergency Medicine, Research Centre, Hôpital du Sacré-Cœur de  
29 Montréal, Montréal, Québec, Canada

30 <sup>b</sup>Faculty of Medicine, Université de Montréal, Montréal, Québec, Canada

31  
32 <sup>c</sup>Centre for Advanced Research in Sleep Medicine and Department of Surgery, Hôpital du  
33 Sacré-Coeur de Montréal, Montreal, Quebec, Canada  
34  
35  
36  
37

38 **Keywords :** Analgesia, Length of Stay, Emergency department, Pain relief  
39  
40  
41

42 **Competing interests:** None Declared  
43  
44

45 **Word count (excluding abstract):** 2 353  
46  
47  
48  
49  
50  
51  
52  
53  
54  
55  
56  
57  
58  
59  
60

## ABSTRACT

**Objectives:** Evaluate the association of adequate analgesia and time to analgesia with emergency department (ED) length of stay (LOS).

**Setting and Design:** Post-hoc analysis of real time archived data.

**Participants:** We included all consecutive ED patients  $\geq 18$  years with pain intensity  $>6$  (verbal numerical scale from 0 to 10), assigned to an ED bed, and whose pain was re-evaluated less than 1 hour after receiving analgesic treatment.

**Outcome measures:** The main outcome was ED-LOS in patients who had adequate pain relief (AR =  $\downarrow 50\%$  pain intensity) compared to those who did not have such relief (NR).

**Results:** A total of 2,033 patients (mean age 49.5 years; 51% men) met our inclusion criteria; 58.3% were discharged, and 41.7% were admitted. Among patients discharged or admitted, there was no significant difference in ED-LOS between those with AR (median [25th-75th percentile]: 9.6 hours [6.3-14.8] and 18.2 hours [11.6-25.7], respectively) and NR (median [25th-75th percentile]: 9.6 hours [6.6-16.0] and 17.4 hours [11.3-26.5], respectively). After controlling for confounding factors, rapid time to analgesia (and not adequate pain relief) was associated with shorter ED-LOS of both discharged and admitted patients ( $p < 0.001$  and  $p < 0.05$  respectively). When adjusting for confounding variables, ED-LOS is shortened by 2 hours (95%CI: 1.1-2.8) when delay to receive analgesic is  $<90$  min compared to  $>90$  min for discharged and by 2.3 hours (95%CI: 0.17-4.4) for admitted patients.

**Conclusions:** In our study, adequate pain relief was not linked with short ED-LOS.

However, rapid administration of analgesia was associated with short ED-LOS.

## ARTICLE SUMMARY

### Strengths and limitations of this study

-This is a rare study that examines the **association** between pain relief and length of stay controlling for multiple confounding variables in a large cohort of emergency department patients.

-The main limitation of our study is its post hoc design and pre-formed database from a single-centre study in an academic hospital.

## INTRODUCTION

Emergency department (ED) overcrowding has been a concern for many years, and Canada is no exception, with nearly 60% of EDs reporting that problem in 2007.<sup>1</sup> The phenomenon of “boarding” is one of the principal factors identified as its cause.<sup>2,3</sup> “Boarding” (or “access block”) refers to situations where bedridden emergency patients wait for the allocation of a bed on the ward for an unreasonably long time period (prolong ED length of stay) with consequent patient overflow in EDs. However, a recent retrospective study revealed that among patients waiting more than 6 hours in the ED, 50% were finally admitted while the other 50% were discharged,<sup>4</sup> indicating that non-boarding patients length of stay (LOS) also contribute to overcrowding. It has been shown to be a strong predictor of low satisfaction among patients<sup>5</sup> and healthcare workers.<sup>1</sup> It is also associated with long hospital LOS,<sup>6,7</sup> and high short- and medium-term mortality rates.<sup>8-10</sup> Furthermore, overcrowding is linked with reduced timeliness and quality of interventions and treatments,<sup>11-13</sup> including delayed analgesic administration,<sup>14,15</sup> particularly when pain is severe,<sup>16</sup> all of which contribute to the snowball effect of cumulating waits.

1  
2  
3 Pain represents more than 40% of consultations in EDs.<sup>17</sup> In large studies of  
4 patients with moderate to severe pain, only 21 to 68%<sup>18-27</sup> received analgesics, and 50 to  
5 74% still had moderate to severe pain at discharge.<sup>17</sup> Severe, persistent pain may also  
6 lead to unwanted physiological responses, namely, increased adrenergic tone, augmented  
7 oxygen consumption, predisposition to hypercoagulability, decreased immune function,  
8 and heightened risk of delirium.<sup>28,29</sup> Moreover, adequate and timely treatment of acute  
9 pain could reduce the risk of chronic pain.<sup>17</sup> The relationship between pain management  
10 and LOS has not been studied as a primary outcome. However, a study of intermittent  
11 injection vs patient-controlled analgesia (PCA) for sickle cell crisis pain in the ED,  
12 established that PCA was associated with a significant reduction in length of ED stay,  
13 although there was no difference in initial or final pain intensity score<sup>30</sup>.

14  
15  
16  
17  
18  
19  
20  
21  
22  
23  
24  
25  
26  
27  
28  
29  
30 Recent studies have attempted to identify the factors contributing to prolonged  
31 ED-LOS. Many of them have already been recognized, namely, number of laboratory  
32 examinations required, having to undergo X-ray or scan, the need for more than 3  
33 medications, and number of consultants.<sup>10,31</sup> To the best of our knowledge, the adequacy  
34 and effectiveness of pain management have never been investigated in this regard. We  
35 sought to evaluate which component of initial pain management was associated with ED-  
36 LOS reduction. We hypothesized that ED-LOS would be lessened in patients with  
37 significant pain relief.

## 38 39 40 41 42 43 44 45 46 47 48 49 50 51 **MATERIALS AND METHODS**

### 52 53 **Study design**



1  
2  
3 We conducted *post hoc* analysis of real time archived data on all consecutive  
4 patients presenting with severe pain at our ED between March 2008 and February 2011.  
5  
6 The aim of our study was to assess if pain relief was associated with ED-LOS reduction.  
7  
8 As a secondary objective, we evaluated if time to receiving analgesic treatment was  
9  
10 linked with lessened ED-LOS.  
11  
12  
13  
14  
15  
16  
17

### 18 **Setting**

19  
20 Hôpital du Sacré-Cœur de Montreal is an urban, adult, level I trauma center with  
21  
22 540 inpatient beds and 60,000 ED visits per year. It sustains 22,000 hospitalizations  
23  
24 annually, of which 51% are admitted through the ED. The study was approved by the  
25  
26 institutional review board.  
27  
28  
29  
30  
31

### 32 **Selection of participants**

33  
34 Patients 18 years or older were included if they were assigned to an ED treatment  
35  
36 bed, had severe pain at triage (defined as  $>6$  on an 11-point verbal numerical scale from 0  
37  
38 to 10),<sup>32-34</sup> received an analgesic, and had their pain intensity re-evaluated in less than 1  
39  
40 hour after such medication.  
41  
42

43  
44 Patients were excluded if they died during their ED stay, were pregnant or had  
45  
46 been transferred from another hospital. We also excluded patients with altered mental  
47  
48 status, intoxicated subjects, and anyone with chest pain necessitating emergent PCI,  
49  
50 because their LOS could be determined by treatments other than pain management.  
51  
52  
53  
54

### 55 **Data collection**

1  
2  
3  
4  
5  
6  
7  
8  
9  
10  
11  
12  
13  
14  
15  
16  
17  
18  
19  
20  
21  
22  
23  
24  
25  
26  
27  
28  
29  
30  
31  
32  
33  
34  
35  
36  
37  
38  
39  
40  
41  
42  
43  
44  
45  
46  
47  
48  
49  
50  
51  
52  
53  
54  
55  
56  
57  
58  
59  
60

Data were extracted from computerized information and nursing records in our ED (MedUrge™, MediaMed Technologies, Mont-Saint-Hilaire, Québec, Canada). This system is an integrated and mandatory working tool for all physicians, nursing staff, and any employee involved in the ED healthcare process. It contains all demographic data, triage information (including vital signs, purpose of consultation, and pain level when relevant) as well as any pertinent data collected in real time by nurses during their re-evaluation rounds, including medication administration, and pain intensity.

### **Data processing**

The cut-off of  $>6$  on 10 was chosen because it was felt that lower pain intensity is less likely to warrant observation in itself. ED-LOS was measured in hours from the time of arrival at the ED to discharge or admission to a ward. We defined adequate pain relief (AR) as reduction of 50% or more of the initial pain level scored on the numerical scale within 1 hour after receiving the first analgesic. The 50% reduction and the 1-hour threshold are based on previous literature suggesting that they represent a meaningful decline<sup>35,36</sup> and acceptable delay in managing severe pain.<sup>34,37,38</sup> Initial pain was the one reported on the triage form. Time between arrival and analgesic administration was dichotomized into  $\leq 90$  minutes versus  $>90$  minutes and also analyzed by three category ( $<1$  hour; between 1 and 2 hour;  $>2$  hour). We selected a 90-minute threshold because it is the median time to analgesia reported in many EDs with a pain scale integrated in their triage assessment.<sup>19,39,40</sup>

1  
2  
3 Our primary outcome was ED-LOS of patients with and without adequate pain  
4 relief. Our secondary outcome was ED-LOS of patients who received their medication in  
5  
6  $\leq 90$  minutes compared to those who received it after a longer time period.  
7  
8  
9

### 10 11 12 **Data analysis**

13  
14  
15 Median LOS (25th-75th percentile) between groups of patients was compared by  
16  
17 the Mann-Whitney U test and relationship among LOS and continuous predictors by  
18  
19 Spearman rank-order correlations. Median differences and their 95% confidence interval  
20  
21 are also reported. All LOS are presented in hours and separately for patients with  
22  
23 intravenous versus patients with other than intravenous route of analgesia administration.  
24  
25 To examine the relative influence of adequate pain relief and time to analgesia on LOS,  
26  
27 generalized linear model regressions with Gamma distribution and a log link function  
28  
29 were undertaken for patients discharged from the ED and those admitted to a ward,  
30  
31 controlling for age, gender, route of analgesia administration (IV vs other), number of  
32  
33 dose of analgesia, type of arrival at ED (ambulance or walk in), triage priority (high vs  
34  
35 low), crowding defined as number of patients in ED beds at the time of arrival, time of  
36  
37 day of arrival with high or low LOS (calculated from a database of 162 000 patients of 18  
38  
39 years or older assigned to a bed between March 2008 and February 2011 from the same  
40  
41 ED and selecting hours of arrival with high LOS and hours of arrival with low LOS),  
42  
43 time between arrival and physician's first assessment, number of examinations, number  
44  
45 of specialty consultations, baseline pain intensity score, trauma versus non-trauma,  
46  
47 abdominal pain versus other, need for oxygen and for isolation. Generalized linear model  
48  
49 was chosen because LOS is largely skewed and tends to produce less prediction errors  
50  
51  
52  
53  
54  
55  
56  
57  
58  
59  
60

than traditional linear regression<sup>41</sup>. Mean LOS difference and Wald 95% CI adjusted at mean covariates were produced from estimated marginal means. The Canadian healthcare system being public and free, the presence or absence of insurance was not analyzed. Alpha level was set at 0.05 for all statistical tests. All data were analyzed with SPSS version 20 (IBM, Somers, NY).

## RESULTS

A total of 2,033 patients met our inclusion and exclusion criteria. Of these patients, about half (51%) were male, more than two third arrived at ED alone, 1,186 (58.3%) were finally discharged and 847 were admitted (Table 1).

Among patients who were discharged from the ED, 45.7% had AR compared to 40.3% of admitted patients. There was no significant difference in ED-LOS between patients with AR compared to those without adequate relief (NR) ( $p=0.41$  for discharged patients and  $p=0.87$  for admitted patients) (Table 2).

Table 1. Patient characteristics of the whole sample

| Characteristics      | Total (N=2,033) |
|----------------------|-----------------|
| Mean age ( $\pm$ SD) | 49.5 (17.0)     |
| % male               | 51.0            |
| % Triage priority    |                 |
| -high (1-2)          | 45.3            |
| -low (3-4-5)         | 54.7            |
| % Arrival            |                 |
| -ambulance           | 29.2            |
| -walk in             | 70.8            |
| % -admitted          | 41.7            |
|                      | 58.3            |

|                                                                                           |                 |
|-------------------------------------------------------------------------------------------|-----------------|
| -discharged                                                                               |                 |
| % -treated with opiates only                                                              | 66.7            |
| -treated with non-opiates only                                                            | 11.1            |
| -treated with combination                                                                 | 22.2            |
| % Route of analgesia administration                                                       |                 |
| -IV                                                                                       | 62.0            |
| -other                                                                                    | 38.0            |
| % with trauma injury                                                                      | 7.6             |
| % with abdominal pain                                                                     | 39.5            |
| % with blood test                                                                         | 6.4             |
| % with heart-rate monitoring                                                              | 11.7            |
| % with oxygen support                                                                     | 9.5             |
| % in isolation                                                                            | 4.5             |
| Mean ( $\pm$ SD) baseline pain intensity score                                            | 8.8 (1.1)       |
| Mean ( $\pm$ SD) final pain intensity score                                               | 5.1 (3.0)       |
| Median LOS in hours (25th-75th percentile)                                                | 12.3 (7.8-20.3) |
| Median time between arrival at ED and analgesic treatment in hours (25th-75th percentile) | 1.8 (1.1-3.2)   |
| Median time to patient care by physician in hours (25th-75th percentile)                  | 0.72 (0.42-1.4) |

---

LOS: length of stay

Among patients who were discharged from the ED, 533 (45%) received analgesia  $\leq$ 90 minutes, with **unadjusted** ED-LOS reduction of **2.2 hours (95%CI: 1.4-3.0; p<0.001)** compared to those with >90 minutes. The same analysis was applied to patients being admitted: only 265 (31%) received their medication in that interval, and their median **unadjusted** ED-LOS reduction was 3.9 hours (**95%CI: 2.0-5.7; p<0.001**) (**Table 2**). Median ED-LOS for three different times to receive analgesia is displayed in **table 3**.

Table 2. Median unadjusted length of stay differences (25th-75th percentiles) for pain relief groups and time to analgesia groups.

|                      | LOS in hour<br>Median (25th-75th<br>percentile) | LOS in hour<br>Median (25th-75th<br>percentile) | Median difference<br>(±95% CI) |
|----------------------|-------------------------------------------------|-------------------------------------------------|--------------------------------|
| Disposition after ED | Adequate relief                                 | No adequate relief                              |                                |
| Discharged patients: | 9.6 (6.3-14.8)                                  | 9.6 (6.6-16.0)                                  | 0.02 (-0.81-0.86)              |
| Admitted patients:   | 18.2 (11.6-25.7)                                | 17.4 (11.3-26.5)                                | -0.8 (-2.8-1.1)                |
| Total:               | 11.9 (7.8-19.6)                                 | 12.6 (7.8-20.6)                                 | -0.7 (-1.6-0.3)                |
| Disposition after ED | ≤1.5 hour delay                                 | >1.5 hour delay                                 |                                |
| Discharged patients: | 8.5 (5.8-12.5)                                  | 10.8 (7.3-17.7)                                 | 2.2* (1.4-3.0)                 |
| Admitted patients:   | 15.2 (10.4-22.6)                                | 19.1 (11.8-27.6)                                | 3.9* (2.0-5.7)                 |
| Total:               | 10.1 (6.6-16.3)                                 | 14.1 (9.0-22.7)                                 | 4.0* (2.3-5.6)                 |

LOS: length of stay; \*p<0.001

Table 3. Median length of stay (25th-75th percentiles) for three different times to receive analgesia controlled for route of analgesia administration for discharged and admitted patients.

| Disposition after ED                 | IV LOS in hour<br>Median (25th-75th<br>percentile) | Other than IV LOS<br>in hour<br>Median (25th-75th<br>percentile) |
|--------------------------------------|----------------------------------------------------|------------------------------------------------------------------|
| Discharged patients:                 | (N=698)                                            | (N=481)                                                          |
| Time to receive analgesia: - <1 hour | 8.6 (6.0-11.8)                                     | 6.6 (4.4-9.5)                                                    |
| - from 1 to 2 hour                   | 10.5 (6.9-15.9)                                    | 8.2 (5.4-12.2)                                                   |

|                                      |           |                  |                  |
|--------------------------------------|-----------|------------------|------------------|
|                                      | - >2 hour | 12.9 (8.9-18.0)  | 10.1 (6.3-19.2)  |
| <hr/>                                |           |                  |                  |
| Admitted patients:                   |           | (N=556)          | (N=289)          |
| Time to receive analgesia: - <1 hour |           | 16.4 (10.8-23.8) | 17.2 (10.7-24.8) |
| - from 1 to 2 hour                   |           | 14.9 (10.4-22.6) | 18.1 (10.0-26.4) |
| - >2 hour                            |           | 18.7 (11.6-27.4) | 19.6 (12.9-28.7) |

LOS: length of stay; IV: intravenous route of analgesia administration; without IV: other than intravenous route of analgesia administration

Table 4 and 5 show the bivariate relations between LOS and all confounding variables controlled for route of analgesia administration for discharged and admitted patients respectively. For discharged patients with IV route of analgesia administration, only type of arrival, crowding and baseline pain intensity score were not related to LOS while for other than IV route of analgesia administration, type of arrival, triage priority, oxygen support, time of day LOS, crowding and baseline pain intensity score were not associated with LOS. For admitted patients with IV route of analgesia administration, triage priority, type of arrival, blood testing, time of day LOS, crowding, number of dose and baseline pain intensity score were not related to LOS while for other than IV route of analgesia administration, gender, triage priority, type of arrival, trauma injury, abdominal pain, time of day LOS and physician taking charge delay were not associated with LOS.

**Table 4.** Relationship between length of stay and all confounding variables for discharged patients.

| Confounding variables    | IV LOS in hour<br>(N=702)        | Other than IV LOS in<br>hour (N=484) |
|--------------------------|----------------------------------|--------------------------------------|
| Categorical confounders: | Median (25th-75th<br>percentile) | Median (25th-75th<br>percentile)     |

|                                                |                                 |                                  |
|------------------------------------------------|---------------------------------|----------------------------------|
| Gender: -male                                  | 9.5 (6.7-15.0)**                | 8.0 (5.5-12.3)**                 |
| -female                                        | 11.1 (7.9-16.9)                 | 9.8 (6.1-18.4)                   |
| Triage priority: -high (1-2)                   | 9.7 (6.7-15.3)**                | 8.8 (5.8-13.1)                   |
| -low (3-4-5)                                   | 10.8 (7.9-17.0)                 | 8.8 (5.8-15.0)                   |
| Arrival: -ambulance                            | 10.8 (7.3-16.3)                 | 8.8 (5.7-15.5)                   |
| -walk in                                       | 10.0 (7.2-15.7)                 | 8.7 (5.8-13.5)                   |
| Trauma injury: -Yes                            | 7.1 (4.1-13.0)**                | 6.4 (4.6-12.7)**                 |
| -No                                            | 10.4 (7.3-15.9)                 | 9.0 (5.9-14.8)                   |
| Abdominal pain: -Yes                           | 11.3 (7.8-17.5)**               | 10.5 (5.7-13.4)**                |
| -No                                            | 9.6 (6.9-14.6)                  | 8.3 (6.9-14.6)                   |
| Blood test: -Yes                               | 16.4 (10.2-23.6)**              | 18.5 (11.6-25.0)**               |
| -No                                            | 10.0 (7.1-15.5)                 | 8.6 (5.8-13.8)                   |
| Heart-rate monitoring: -Yes                    | 14.6 (10.6-24.4)**              | 12.7 (9.2-27.8)**                |
| -No                                            | 9.8 (6.9-15.2)                  | 8.2 (5.7-13.4)                   |
| Oxygen support: -Yes                           | 13.5 (8.7-23.0)**               | 10.4 (8.7-23.0)                  |
| -No                                            | 10.0 (7.1-15.4)                 | 8.6 (5.7-14.0)                   |
| Isolation: -Yes                                | 22.7 (11.3-36.7)**              | 22.6 (11.7-44.3)**               |
| -No                                            | 10.0 (7.1-15.7)                 | 8.6 (5.8-13.5)                   |
| Time of day of arrival with: -low LOS          | 9.0 (7.1-10.7)**                | 8.6 (6.1-10.4)                   |
| -high LOS                                      | 11.1 (7.2-16.9)                 | 8.8 (5.7-15.2)                   |
| Continuous confounders:                        | Spearman rank-order correlation | Spearman rank- order correlation |
| Age:                                           | 0.18**                          | 0.09*                            |
| Crowding:                                      | 0.06                            | -0.06                            |
| Physician taking charge delay:                 | 0.21**                          | 0.19**                           |
| Number of exams (range 0-15):                  | 0.33**                          | 0.29**                           |
| Number of specialist consultation (range 0-8): | 0.41**                          | 0.44**                           |
| Number of dose (range 1-7):                    | -0.13**                         | -0.10*                           |
| Baseline pain intensity score:                 | -0.06                           | -0.01                            |

LOS : length of stay; IV: intravenous route of analgesia administration; other than IV: other than intravenous route of analgesia administration; \*p<0.05; \*\*p<0.01

**Table 5.** Relationship between length of stay and all confounding variables for **admitted** patients.



| Confounding variables                          | IV LOS in hour<br>(N=558)           | Other than IV LOS in<br>hour (N=289) |
|------------------------------------------------|-------------------------------------|--------------------------------------|
| Categorical confounders:                       | Median (25th-75th<br>percentile)    | Median (25th-75th<br>percentile)     |
| Gender: -male                                  | 15.4 (10.5-23.6)*                   | 18.9 (11.4-27.5)                     |
| -female                                        | 18.0 (11.7-25.4)                    | 19.5 (12.7-27.9)                     |
| Triage priority: -high (1-2)                   | 16.4 (10.4-24.5)                    | 18.4 (11.1-25.8)                     |
| -low (3-4-5)                                   | 17.2 (11.7-25.0)                    | 19.5 (12.9-27.6)                     |
| Arrival: -ambulance                            | 17.0 (10.7-25.3)                    | 20.7 (13.5-28.4)                     |
| -walk in                                       | 16.6 (11.4-24.5)                    | 18.4 (12.0-26.9)                     |
| Trauma injury: -Yes                            | 12.5 (8.7-21.1)*                    | 15.7 (8.2-27.6)                      |
| -No                                            | 17.0 (11.4-24.8)                    | 19.4 (12.6-27.6)                     |
| Abdominal pain: -Yes                           | 16.0 (10.9-23.3)*                   | 19.4 (12.9-26.7)                     |
| -No                                            | 18.0 (11.5-27.6)                    | 19.3 (11.6-28.2)                     |
| Blood test: -Yes                               | 19.8 (11.8-28.5)                    | 27.9 (16.4-35.8)**                   |
| -No                                            | 16.4 (10.9-24.5)                    | 18.8 (11.6-26.8)                     |
| Heart-rate monitoring: -Yes                    | 23.1 (16.2-38.6)**                  | 30.0 (25.3-45.2)**                   |
| -No                                            | 15.6 (10.7-23.1)                    | 17.8 (11.3-25.7)                     |
| Oxygen support: -Yes                           | 20.9 (12.3-34.4)**                  | 26.8 (15.1-45.0)**                   |
| -No                                            | 15.9 (10.8-24.1)                    | 18.7 (11.7-26.7)                     |
| Isolation: -Yes                                | 30.1 (21.8-54.3)**                  | 35.5 (22.6-57.8)**                   |
| -No                                            | 15.9 (10.8-23.8)                    | 18.5 (11.6-26.7)                     |
| Time of day of arrival with: -low LOS          | 15.7 (9.7-29.1)                     | 16.2 (10.6-24.2)                     |
| -high LOS                                      | 17.0 (11.4-24.5)                    | 19.8 (12.7-27.8)                     |
| Continuous confounders:                        | Spearman rank-<br>order correlation | Spearman rank-order<br>correlation   |
| Age:                                           | 0.15**                              | 0.22**                               |
| Crowding:                                      | 0.03                                | 0.17**                               |
| Physician taking charge delay:                 | 0.16**                              | 0.06                                 |
| Number of exams (range 0-15):                  | 0.34**                              | 0.36**                               |
| Number of specialist consultation (range 0-8): | 0.31**                              | 0.37**                               |
| Number of dose (range 1-7):                    | -0.03                               | -0.15**                              |
| Baseline pain intensity score:                 | 0.003                               | -0.12*                               |

LOS : length of stay; IV: intravenous route of analgesia administration; other than IV: other than intravenous route of analgesia administration; \*p<0.05; \*\*p<0.01

1  
2  
3  
4  
5  
6  
7  
8  
9  
10  
11  
12  
13  
14  
15  
16  
17  
18  
19  
20  
21  
22  
23  
24  
25  
26  
27  
28  
29  
30  
31  
32  
33  
34  
35  
36  
37  
38  
39  
40  
41  
42  
43  
44  
45  
46  
47  
48  
49  
50  
51  
52  
53  
54  
55  
56  
57  
58  
59  
60

Multivariate analysis showed that when controlling for confounding variables, a brief time period ( $\leq 90$  minutes) before analgesic administration (and not adequate pain relief) is associated with shortened ED-LOS for both discharged and admitted patients ( $\beta=0.16$ ; 95% confidence interval (95% CI): 0.10-0.22;  $p<0.001$  and  $\beta=0.09$ ; 95% CI: 0.006-0.18;  $p<0.05$ , respectively). When adjusting for confounding variables, ED-LOS is shortened by 2 hours (95%CI: 1.1-2.8;  $p<0.001$ ) when time to receive analgesic is  $<90$  min compared to  $>90$  min for discharged and by 2.3 hours (95%CI: 0.17-4.4;  $p<0.05$ ) for admitted patients.

## LIMITATIONS

The main limitation of our study is its post hoc design and pre-formed database. Potential confounding variables, such as ethnicity and linguistic barrier, which are not recorded in demographic charts of our computerized system, could not be taken into consideration. Time from pain onset, component of chronic pain and pharmacological or non-pharmacological analgesia prior to arrival at the ED were also unknown. Case complexity assessment was difficult, although we controlled for number of examinations, number of consultants, need for oxygen and for isolation, which are markers of complexity. Likewise, we do not know if some patients did not receive an analgesic nor had suboptimal pain management because of refusal. However, it is doubtful that any of these confounding variables would cause significant differential bias. Finally, our single-center study in an academic hospital might limit the generalization of our results.

## DISCUSSION

1  
2  
3  
4 As far as we know, this is the first investigation to evaluate the impact of pain  
5 relief on ED-LOS, and our results demonstrated that rapid administration of analgesia,  
6 and not adequate pain relief, is associated with shorter ED-LOS. It has been reported that  
7 patients expect to receive pain medication 25 to 30 minutes after their arrival,<sup>42</sup> which  
8 coincides with the guidelines of our triage system (Canadian Emergency Department  
9 Triage and Acuity Scale).<sup>43</sup> Unfortunately, this goal is far from being achieved in many  
10 EDs, not only in Canada, but also around the world.<sup>19,27,42</sup> This is a persistent problem  
11 that dates back to the late 1980s when Wilson and Pendleton first defined the term  
12 “oligoanalgesia”.<sup>44</sup>

13  
14  
15  
16  
17  
18  
19  
20  
21  
22  
23  
24  
25 More recently, the Pain and Emergency Medicine Initiative study demonstrated  
26 that patient satisfaction was associated more with the way ED physicians responded to  
27 their complaints of pain than to the actual result of pain treatment.<sup>19</sup> Which components  
28 of this response to pain were significant was not specified, but a possible part of it was  
29 the promptness with which pain was addressed. Patients with severe pain probably  
30 associate receiving pain medication quickly with quality of care and are more inclined to  
31 accept a medical treatment plan, even if they do not get relief. This might explain why  
32 we observed improved ED-LOS with prompt analgesic administration in patients being  
33 discharged or admitted.

34  
35  
36  
37  
38  
39  
40  
41  
42  
43  
44  
45  
46 In our study, the adjusted ED-LOS was 2 hours shorter in discharged patients who  
47 received their medication in  $\leq 90$  minutes than in those treated in  $> 90$  minutes. The rapid  
48 administration of analgesia, associated with shorter ED-LOS, could have a significant  
49 impact on ED overcrowding. For example, our center received an average of 5,000  
50 patients per year with severe pain on an ED bed. If we extrapolate the proportion of  
51  
52  
53  
54  
55  
56  
57  
58  
59  
60

1  
2  
3 patient who received analgesia >90 minutes after arrival and the time saved if received in  
4  
5 less than 90 minutes from our study to this population, a bed could be available during 16  
6  
7 hours every day. Such economy of beds would contribute to better throughput of patients  
8  
9 and render our EDs more efficient, as espoused by Asplin et al. with their conceptual  
10  
11 model of overcrowding in 2003.<sup>2</sup>  
12  
13

14  
15 A recent consensus of the Canadian Association of Emergency Physicians has  
16  
17 ranked “ED-LOS” and “Time to first dose of analgesic” in the top 12 priority indicators  
18  
19 of quality care.<sup>45</sup> In the USA, the Joint Commission on Accreditation of Healthcare  
20  
21 Organizations mentions “early intervention” as the first goal in the treatment of acute  
22  
23 pain.<sup>37</sup> Similarly, the Australian National Institute of Clinical Studies ranked “reduced  
24  
25 time to analgesia” as the top priority and is currently working on improving their  
26  
27 numbers.<sup>42</sup>  
28  
29

30  
31 New solutions are being proposed to improve the initial approach to pain  
32  
33 management. For example, the simple act of making pain scoring mandatory at triage has  
34  
35 been shown to reduce time to analgesia by 45 minutes.<sup>40</sup> Extension of this practice could  
36  
37 also integrate pain treatment as early as triage to limit further delays. Such measures have  
38  
39 been introduced in Australia where nurse-initiated pain protocols are currently being  
40  
41 evaluated. A pediatric ED study has shown 50% reduction of time to analgesia with such  
42  
43 a protocol.<sup>39</sup> Early administration of analgesics has been investigated in pre-hospital  
44  
45 settings, and appears to be safe and effective, particularly with the use of intranasal  
46  
47 Fentanyl.<sup>46,47</sup> Even if no study has yet shown a benefit of this practice in LOS, it certainly  
48  
49 has promising advantages, and further investigations should be considered.  
50  
51  
52  
53  
54  
55  
56  
57  
58  
59  
60

1  
2  
3 In summary, we found that shorter time to analgesia administration is associated  
4 with ED-LOS reduction. This observation supports recent interest in analgesia  
5 implementation as early as triage or in pre-hospital settings to improve the throughput  
6 component of the overcrowding phenomenon seen in EDs around the world.  
7  
8  
9  
10  
11  
12  
13

14  
15 **Contributors** CS, RD and JMC conceived the study and obtained research funding. JP  
16 mined and analyzed the data. CS drafted the manuscript, and all authors contributed  
17 substantially to its revision. CS takes responsibility for the paper as a whole. All co-  
18 authors have had the opportunity to review the final manuscript and have provided their  
19 permission to publish the manuscript.  
20  
21  
22  
23  
24  
25  
26  
27  
28

29 **Funding** This study was supported by the Emergency Department Research Fund of  
30 Hôpital du Sacré-Coeur de Montréal.  
31  
32  
33  
34  
35

36 **Competing interests** None.  
37  
38

39 **Ethics approval** The study was approved by the institutional review board.  
40  
41

42 **Provenance and peer review** Not commissioned; externally peer reviewed.  
43  
44  
45  
46  
47  
48

## 49 **BIBLIOGRAPHY**

- 50  
51 1. Bond K, Ospina MB, Blitz S, et al. Frequency, determinants and impact of  
52 overcrowding in emergency departments in Canada: a national survey. *Healthc Q*  
53 2007;10:32-40.  
54  
55  
56  
57  
58  
59  
60

- 1  
2  
3 2. Asplin BR, Magid DJ, Rhodes KV, et al. A conceptual model of emergency  
4 department crowding. *Ann Emerg Med* 2003;42:173-80.  
5  
6  
7
- 8 3. Health Technology Assessment – Strategies to reduce emergency department  
9 overcrowding, Alberta Heritage Foundation for Medical Research, 2006.  
10  
11
- 12 4. Henneman PL, Nathanson BH, Li H, et al. Emergency department patients who  
13 stay more than 6 hours contribute to crowding. *J Emerg Med* 2010;39:105-12.  
14  
15
- 16 5. Taylor C. Patient satisfaction in emergency medicine. *Emerg Med J* 2004;21:528-  
17 32.  
18  
19
- 20 6. Bernstein SL, Aronsky D, Duseja R, et al. The effect of emergency department  
21 crowding on clinically oriented outcomes. *Acad Emerg Med* 2009;16:1-10.  
22  
23
- 24 7. Richardson DB. The access-block effect: relationship between delay to reaching  
25 an inpatient bed and inpatient length of stay. *Med J Aust* 2002;177:492-5.  
26  
27
- 28 8. Richardson DB. Increase in patient mortality at 10 days associated with  
29 emergency department overcrowding. *Med J Aust* 2006;184:213-6.  
30  
31
- 32 9. Sprivulis PC, Da Silva JA, Jacobs IG, et al. The association between hospital  
33 overcrowding and mortality among patients admitted via Western Australian  
34 emergency departments. *Med J Aust* 2006;184:208-12.  
35  
36
- 37 10. Mowery NT, Dougherty SD, Hildreth AN, et al. Emergency department length of  
38 stay is an independent predictor of hospital mortality in trauma activation patients.  
39 *J Trauma* 2011;70:1317-25.  
40  
41
- 42 11. Miró O, Antonio MT, Jiménez S, et al. Decreased health care quality associated  
43 with emergency department overcrowding. *Eur J Emerg Med* 1999;6:105-7.  
44  
45  
46  
47  
48  
49  
50  
51  
52  
53  
54  
55  
56  
57  
58  
59  
60

- 1  
2  
3 12. Trzeciak S, Rivers EP. Emergency department overcrowding in the United  
4 States: an emerging threat to patient safety and public health. *Emerg Med J*  
5 2003;20:402-5.  
6  
7
- 8  
9  
10 13. Joint Commission on Accreditation Healthcare Organizations, Sentinel Event  
11 Alert - Delays in treatment. Issue 26, June 2002  
12
- 13  
14 14. Hwang U, Morrison R, Harris B, et al. The association of ED crowding factors  
15 with quality of pain management. *Acad Emerg Med* 2007;14:S54.  
16  
17
- 18  
19 15. Hwang U, Richardson LD, Sonuyi TO, et al. The effect of emergency department  
20 crowding on the management of pain in older adults with hip fracture. *J Am*  
21 *Geriat Soc* 2006;54:270-5.  
22  
23
- 24  
25 16. Pines JM, Hollander JE. Emergency department crowding is associated with poor  
26 care for patients with severe pain. *An Emerg Med* 2008;51:1-5.  
27  
28
- 29  
30 17. Sinatra R. Causes and consequences of inadequate management of acute pain.  
31 *Pain Med* 2010;11:1859-71.  
32  
33
- 34  
35 18. Selbst SM. Analgesic use in the emergency department. *Ann Emerg Med*  
36 1990;19:1010-13.  
37  
38
- 39  
40 19. Todd KH, Ducharme J, Choiniere M, et al. Pain in the emergency department:  
41 results of the pain and emergency medicine initiative (PEMI) multicenter study. *J*  
42 *Pain* 2007;8:460-6.  
43  
44
- 45  
46 20. Todd KH, Sloan EP, Chen C, et al. Survey of pain etiology, management  
47 practices and patient satisfaction in two urban emergency departments. *CJEM*  
48 2002;4:252-6.  
49  
50  
51  
52  
53  
54  
55  
56  
57  
58  
59  
60

- 1  
2  
3  
4  
5  
6  
7  
8  
9  
10  
11  
12  
13  
14  
15  
16  
17  
18  
19  
20  
21  
22  
23  
24  
25  
26  
27  
28  
29  
30  
31  
32  
33  
34  
35  
36  
37  
38  
39  
40  
41  
42  
43  
44  
45  
46  
47  
48  
49  
50  
51  
52  
53  
54  
55  
56  
57  
58  
59  
60
21. Silka PA. Pain scores improve analgesic administration patterns for trauma patients in the emergency department. *Acad Emerg Med* 2004;11:264-70.
  22. Stalnikowicz R, Mahamid R, Kaspi S, et al. Undertreatment of acute pain in the emergency department: a challenge. *Int J Qual Health Care* 2005;17:173-6.
  23. Chen EH, Shofer FS, Dean AJ, et al. Gender disparity in analgesic treatment of emergency department patients with acute abdominal pain. *Acad Emerg Med* 2008;15:414-8.
  24. Singer AJ, Garra G, Chohan JK, et al. Triage pain scores and the desire for and use of analgesics. *Ann Emerg Med* 2008;52:689-95.
  25. Yakuna M, Soffer D, Halpern P, et al. An interventional study to improve the quality of analgesia in the emergency department. *CJEM* 2008;10:435-9.
  26. Pines JM, Shofer FS, Isserman JA, et al. The effect of emergency department crowding on analgesia in patients with back pain in two hospitals. *Acad Emerg Med* 2010;17:276-83.
  27. Grant PS. Analgesia delivery in the ED. *Am J Emerg Med* 2006;24:806-9.
  28. Dunwoody CJ, Krenzischek DA, Pasero C, et al. Assessment, physiological monitoring, and consequences of inadequately treated acute pain. *Pain Manag Nurs* 2008;9:11-21.
  29. Morrison RS, Magaziner J, Gilbert M, et al., Relationship between pain and opioid analgesics on the development of delirium following hip fracture. *J Gerontol A Biol Sci Med Sci* 2003;58:76-81.



- 1
  - 2
  - 3
  - 4
  - 5
  - 6
  - 7
  - 8
  - 9
  - 10
  - 11
  - 12
  - 13
  - 14
  - 15
  - 16
  - 17
  - 18
  - 19
  - 20
  - 21
  - 22
  - 23
  - 24
  - 25
  - 26
  - 27
  - 28
  - 29
  - 30
  - 31
  - 32
  - 33
  - 34
  - 35
  - 36
  - 37
  - 38
  - 39
  - 40
  - 41
  - 42
  - 43
  - 44
  - 45
  - 46
  - 47
  - 48
  - 49
  - 50
  - 51
  - 52
  - 53
  - 54
  - 55
  - 56
  - 57
  - 58
  - 59
  - 60
30. Gonzalez ER, Bahal N, Hansen LA, et al. Intermittent injection vs patient-controlled analgesia for sickle cell crisis pain. Comparison in patients in the emergency department. *Arch Intern Med* 1991;151:1373-78.
31. Gardner RL, Sarkar U, Maselli JH, et al. Factors associated with longer ED lengths of stay. *Am J Emerg Med* 2007;25:643-50.
32. Aubrun F, Langeron O, Quesnel C, et al. Relationships between measurement of pain using visual analog score and morphine requirements during postoperative intravenous morphine titration. *Anesthesiology* 2003;98:1415-21.
33. Macintyre PE, Scott DA, Schug SA, et al. Acute Pain Management: Scientific Evidence, 3<sup>rd</sup> edition. Australian and New Zealand College of Anaesthetists. 2010; p. 491.
34. Smith S, Radcliffe J. Guidelines for the management of pain in adults. Clinical Guidelines 2010.
35. Moore A, McQuay H, Gavaghan D, et al. Deriving dichotomous outcome measures from continuous data in randomised controlled trials of analgesics. *Pain* 1996;66:229-37.
36. Moore A, McQuay H, Gavaghan D, et al. Deriving dichotomous outcome measures from continuous data in randomised controlled trials of analgesics: verification from independent data. *Pain* 1997;69:127-30.
37. Joint Commission on Accreditation Healthcare Organizations, Pain: current understanding of assessment, management, and treatments. 2001; p. 92.
38. Carns P. Healthcare Guideline: Assessment and Management of Acute Pain, 6<sup>th</sup> edition. Institute for Clinical Systems Improvement. 2008; p. 58.

- 1  
2  
3  
4  
5  
6  
7  
8  
9  
10  
11  
12  
13  
14  
15  
16  
17  
18  
19  
20  
21  
22  
23  
24  
25  
26  
27  
28  
29  
30  
31  
32  
33  
34  
35  
36  
37  
38  
39  
40  
41  
42  
43  
44  
45  
46  
47  
48  
49  
50  
51  
52  
53  
54  
55  
56  
57  
58  
59  
60
39. Boyd RJ. The efficacy of structured assessment and analgesia provision in the paediatric emergency department. *Emerg Med J* 2005;22:30-2.
  40. Vazirani J, Knott JC. Mandatory pain scoring at triage reduces time to analgesia. *Ann Emerg Med* 2012;59:134-38.
  41. Austin PC, Rothwell DM, Tu JV. A comparison of statistical modeling strategies for analyzing length of stay after CABG surgery. *Health Serv Outcomes Res Methodol* 2002;3:107-33.
  42. National Institute of Clinical Studies - National Emergency Department Collaborative Final Report, Melbourne Australia's, April 2004.
  43. Beveridge RC, Clarke B, Janes L, et al. Implementation guidelines for the Canadian Emergency Department Triage and Acuity Scale. Endorsed by the Canadian Association Of Emergency Physicians (CAEP), the National Emergency Nurses Affiliation of Canada (NENA), and L'association des médecins d'urgence du Québec (AMUQ). 1998; p. 1-32.
  44. Wilson JE, Pendleton JM. Oligoanalgesia in the emergency department. *Am J Emerg Med* 1989;7:620-3.
  45. Schull MJ, Guttman A, Leaver CA, et al. Prioritizing performance measurement for emergency department care: consensus on evidence-based quality of care indicators. *CJEM* 2011;13:300-9.
  46. Bendall JC, Simpson PM, Middleton PM, et al. Effectiveness of prehospital morphine, Fentanyl, and Methoxyflurane in pediatric patients. *Prehosp Emerg Care* 2011;15:158-65.

- 1  
2  
3 47. Krauss WC, Shah S, Shah S, et al. Fentanyl in the out-of-hospital setting:  
4  
5 variables associated with hypotension and hypoxemia. *J Emerg Med*  
6  
7  
8 2011;40:182-7.  
9  
10  
11  
12  
13  
14  
15  
16  
17  
18  
19  
20  
21  
22  
23  
24  
25  
26  
27  
28  
29  
30  
31  
32  
33  
34  
35  
36  
37  
38  
39  
40  
41  
42  
43  
44  
45  
46  
47  
48  
49  
50  
51  
52  
53  
54  
55  
56  
57  
58  
59  
60

For peer review only

## STROBE Statement—checklist of items that should be included in reports of observational studies

|                              | Item No | Recommendation                                                                                                                                                                                                                                                                                                                                                                                                                                                                                                                                                                                                                                                                                               |
|------------------------------|---------|--------------------------------------------------------------------------------------------------------------------------------------------------------------------------------------------------------------------------------------------------------------------------------------------------------------------------------------------------------------------------------------------------------------------------------------------------------------------------------------------------------------------------------------------------------------------------------------------------------------------------------------------------------------------------------------------------------------|
| <b>Title and abstract</b>    | 1       | (a) Indicate the study's design with a commonly used term in the title or the abstract<br><b>Done</b><br>(b) Provide in the abstract an informative and balanced summary of what was done and what was found <b>Done</b>                                                                                                                                                                                                                                                                                                                                                                                                                                                                                     |
| <b>Introduction</b>          |         |                                                                                                                                                                                                                                                                                                                                                                                                                                                                                                                                                                                                                                                                                                              |
| Background/rationale         | 2       | Explain the scientific background and rationale for the investigation being reported<br><b>Done</b>                                                                                                                                                                                                                                                                                                                                                                                                                                                                                                                                                                                                          |
| Objectives                   | 3       | State specific objectives, including any prespecified hypotheses <b>Done</b>                                                                                                                                                                                                                                                                                                                                                                                                                                                                                                                                                                                                                                 |
| <b>Methods</b>               |         |                                                                                                                                                                                                                                                                                                                                                                                                                                                                                                                                                                                                                                                                                                              |
| Study design                 | 4       | Present key elements of study design early in the paper <b>Done</b>                                                                                                                                                                                                                                                                                                                                                                                                                                                                                                                                                                                                                                          |
| Setting                      | 5       | Describe the setting, locations, and relevant dates, including periods of recruitment, exposure, follow-up, and data collection <b>Done</b>                                                                                                                                                                                                                                                                                                                                                                                                                                                                                                                                                                  |
| Participants                 | 6       | (a) <i>Cohort study</i> —Give the eligibility criteria, and the sources and methods of selection of participants. Describe methods of follow-up<br><i>Case-control study</i> —Give the eligibility criteria, and the sources and methods of case ascertainment and control selection. Give the rationale for the choice of cases and controls<br><i>Cross-sectional study</i> —Give the eligibility criteria, and the sources and methods of selection of participants <b>Done</b><br>(b) <i>Cohort study</i> —For matched studies, give matching criteria and number of exposed and unexposed<br><i>Case-control study</i> —For matched studies, give matching criteria and the number of controls per case |
| Variables                    | 7       | Clearly define all outcomes, exposures, predictors, potential confounders, and effect modifiers. Give diagnostic criteria, if applicable <b>Done</b>                                                                                                                                                                                                                                                                                                                                                                                                                                                                                                                                                         |
| Data sources/<br>measurement | 8*      | For each variable of interest, give sources of data and details of methods of assessment (measurement). Describe comparability of assessment methods if there is more than one group <b>Done</b>                                                                                                                                                                                                                                                                                                                                                                                                                                                                                                             |
| Bias                         | 9       | Describe any efforts to address potential sources of bias <b>Done</b>                                                                                                                                                                                                                                                                                                                                                                                                                                                                                                                                                                                                                                        |
| Study size                   | 10      | Explain how the study size was arrived at <b>Not applicable</b>                                                                                                                                                                                                                                                                                                                                                                                                                                                                                                                                                                                                                                              |
| Quantitative variables       | 11      | Explain how quantitative variables were handled in the analyses. If applicable, describe which groupings were chosen and why <b>Done</b>                                                                                                                                                                                                                                                                                                                                                                                                                                                                                                                                                                     |
| Statistical methods          | 12      | (a) Describe all statistical methods, including those used to control for confounding<br><b>Done</b><br>(b) Describe any methods used to examine subgroups and interactions <b>Not applicable</b><br>(c) Explain how missing data were addressed <b>Done</b><br>(d) <i>Cohort study</i> —If applicable, explain how loss to follow-up was addressed<br><i>Case-control study</i> —If applicable, explain how matching of cases and controls was addressed<br><i>Cross-sectional study</i> —If applicable, describe analytical methods taking account of sampling strategy<br>(e) Describe any sensitivity analyses <b>Not applicable</b>                                                                     |

Continued on next page

**Results**

|                  |     |                                                                                                                                                                                                                                                                                                                                                                                                                                       |
|------------------|-----|---------------------------------------------------------------------------------------------------------------------------------------------------------------------------------------------------------------------------------------------------------------------------------------------------------------------------------------------------------------------------------------------------------------------------------------|
| Participants     | 13* | (a) Report numbers of individuals at each stage of study—eg numbers potentially eligible, examined for eligibility, confirmed eligible, included in the study, completing follow-up, and analysed <b>Done</b><br>(b) Give reasons for non-participation at each stage <b>Done</b><br>(c) Consider use of a flow diagram                                                                                                               |
| Descriptive data | 14* | (a) Give characteristics of study participants (eg demographic, clinical, social) and information on exposures and potential confounders <b>Done</b><br>(b) Indicate number of participants with missing data for each variable of interest <b>Done</b><br>(c) <i>Cohort study</i> —Summarise follow-up time (eg, average and total amount)                                                                                           |
| Outcome data     | 15* | <i>Cohort study</i> —Report numbers of outcome events or summary measures over time<br><i>Case-control study</i> —Report numbers in each exposure category, or summary measures of exposure<br><i>Cross-sectional study</i> —Report numbers of outcome events or summary measures <b>Done</b>                                                                                                                                         |
| Main results     | 16  | (a) Give unadjusted estimates and, if applicable, confounder-adjusted estimates and their precision (eg, 95% confidence interval). Make clear which confounders were adjusted for and why they were included <b>Done</b><br>(b) Report category boundaries when continuous variables were categorized <b>Done</b><br>(c) If relevant, consider translating estimates of relative risk into absolute risk for a meaningful time period |
| Other analyses   | 17  | Report other analyses done—eg analyses of subgroups and interactions, and sensitivity analyses                                                                                                                                                                                                                                                                                                                                        |

**Discussion**

|                  |    |                                                                                                                                                                                        |
|------------------|----|----------------------------------------------------------------------------------------------------------------------------------------------------------------------------------------|
| Key results      | 18 | Summarise key results with reference to study objectives <b>Done</b>                                                                                                                   |
| Limitations      | 19 | Discuss limitations of the study, taking into account sources of potential bias or imprecision. Discuss both direction and magnitude of any potential bias <b>Done</b>                 |
| Interpretation   | 20 | Give a cautious overall interpretation of results considering objectives, limitations, multiplicity of analyses, results from similar studies, and other relevant evidence <b>Done</b> |
| Generalisability | 21 | Discuss the generalisability (external validity) of the study results <b>Done</b>                                                                                                      |

**Other information**

|         |    |                                                                                                                                                                           |
|---------|----|---------------------------------------------------------------------------------------------------------------------------------------------------------------------------|
| Funding | 22 | Give the source of funding and the role of the funders for the present study and, if applicable, for the original study on which the present article is based <b>Done</b> |
|---------|----|---------------------------------------------------------------------------------------------------------------------------------------------------------------------------|

\*Give information separately for cases and controls in case-control studies and, if applicable, for exposed and unexposed groups in cohort and cross-sectional studies.

**Note:** An Explanation and Elaboration article discusses each checklist item and gives methodological background and published examples of transparent reporting. The STROBE checklist is best used in conjunction with this article (freely available on the Web sites of PLoS Medicine at <http://www.plosmedicine.org/>, Annals of Internal Medicine at <http://www.annals.org/>, and Epidemiology at <http://www.epidem.com/>). Information on the STROBE Initiative is available at [www.strobe-statement.org](http://www.strobe-statement.org).
